# Supplementary material
Source: PubMed Central journal article supplement (PMC2527037)
Supplement: NIHMS63098-supplement-2si20060105_08.pdf [file NIHMS63098-supplement-2si20060105_08.pdf]

# Supporting Information

## Studies on a Total Synthesis of the Microbial Immunosuppressive Agent FR901483

Jeffrey E. Kropf, Ivona C. Meigh, Magnus W.P. Bebbington and Steven M. Weinreb\*

*Department of Chemistry, The Pennsylvania State University  
University Park, Pennsylvania 16802*

*smw@chem.psu.edu*

### **Table of Contents**

|                                      |         |
|--------------------------------------|---------|
| Title page                           | S1      |
| NMR spectra of compounds <b>7-54</b> | S2-S46  |
| X-Ray data compound <b>14</b>        | S47-S52 |
| X-Ray data compound <b>34</b>        | S53-S56 |

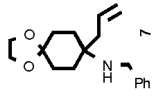

Current Data Parameters  
 NAME Feb15-00-weince  
 EXPNO 10  
 PROCNO 1

F2 - Acquisition Parameters  
 Date\_ 20000215  
 Time 8.33  
 INSTRUM spect  
 PROBHD 5 mm QNP 1H  
 PULPROG zg30  
 TD 32768  
 SOLVENT CDCl3  
 NS 16  
 DS 2  
 SWH 7462.687 Hz  
 FIDRES 0.227743 Hz  
 AQ 2.1955061 sec  
 RG 64  
 DM 67.000 usec  
 DE 95.71 usec  
 TE 300.0 K  
 HL1 0 dB  
 D1 1.0000000 sec  
 P1 12.60 usec  
 SF01 360.1361940 MHz  
 NUCLEUS 1H

F2 - Processing parameters  
 S1 16384  
 SF 360.1338793 MHz  
 WDW EM  
 SSB 0  
 LB 0.30 Hz  
 GB 0  
 PC 1.00

1D NMR plot parameters  
 CX 20.00 cm  
 F1P 6.000 ppm  
 F1 2881.07 Hz  
 F2P 0.000 ppm  
 F2 0.00 Hz  
 PPMCM 0.40000 ppm/cm  
 HZCM 144.05359 Hz/cm

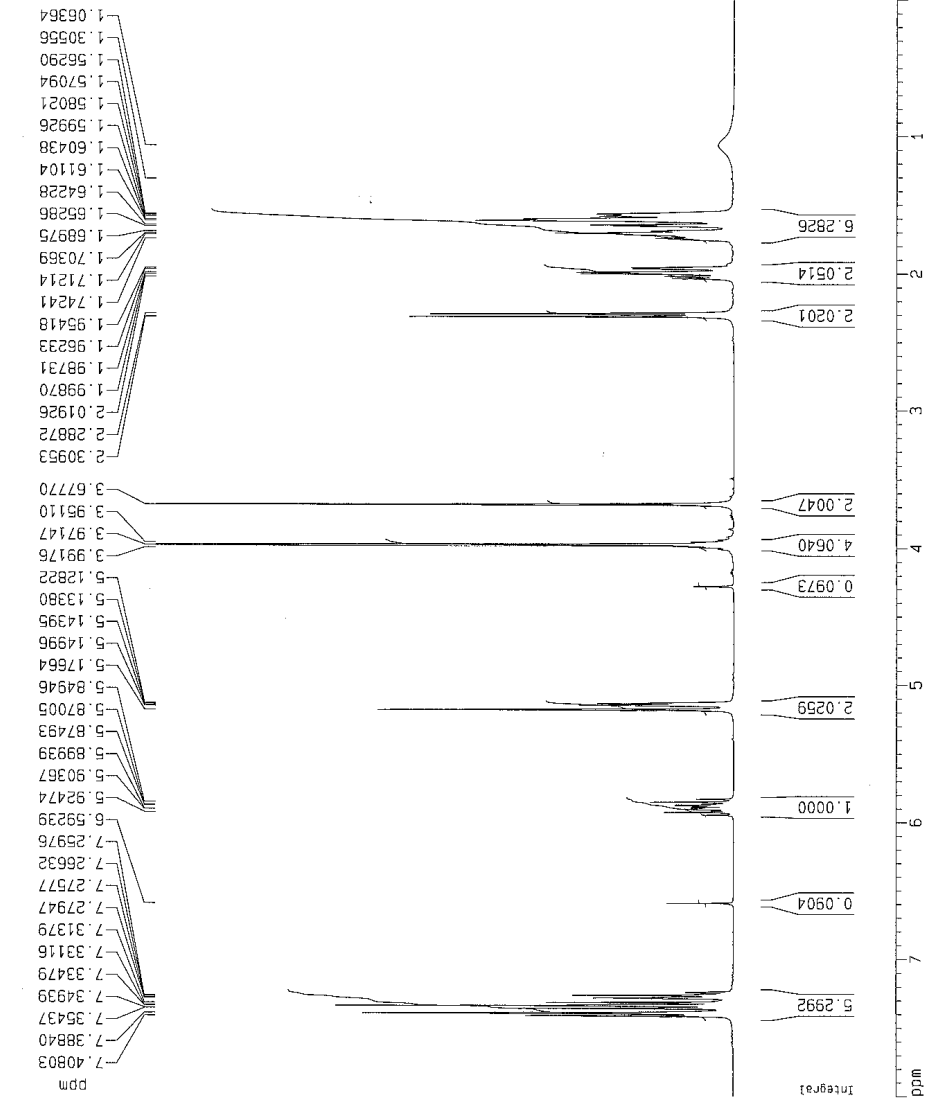

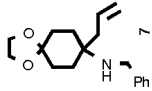

Current Data Parameters  
 NAME Feb15-00-Me19e  
 EXPNO 11  
 PROCNO 1

F2 - Acquisition Parameters  
 Date\_ 20000215  
 Time 6.36  
 INSTRUM spect  
 PROBHD 5 mm QNP 1H  
 PULPROG zgpg30  
 TO 65536  
 SOLVENT CDCl3  
 NS 105  
 DS 2  
 SWH 29411.766 Hz  
 FIDRES 0.448788 Hz  
 AQ 1.1141620 sec  
 RG 32768  
 DN 17.000 usec  
 DE 24.29 usec  
 TE 300.0 K  
 HL1 0 dB  
 D1 2.00000000 sec  
 CPDPRG walz16  
 P31 106.00 usec  
 S4 30 dB  
 D11 0.03000000 sec  
 S2 30 dB  
 F1 8.50 usec  
 SFD1 90.5638242 MHz  
 NUCLEUS 13C

F2 - Processing parameters  
 SI 32768  
 SF 50.557748 MHz  
 NQM EM  
 SSB 0  
 LB 1.00 Hz  
 BB 0  
 PC 1.40

1D NMR plot parameters  
 CK 20.00 cm  
 F1P 175.000 ppm  
 F1 15847.26 Hz  
 F2P 0.000 ppm  
 F2 0.00 Hz  
 PPHCM 8.75000 ppm/cm  
 HZCM 792.36316 Hz/cm

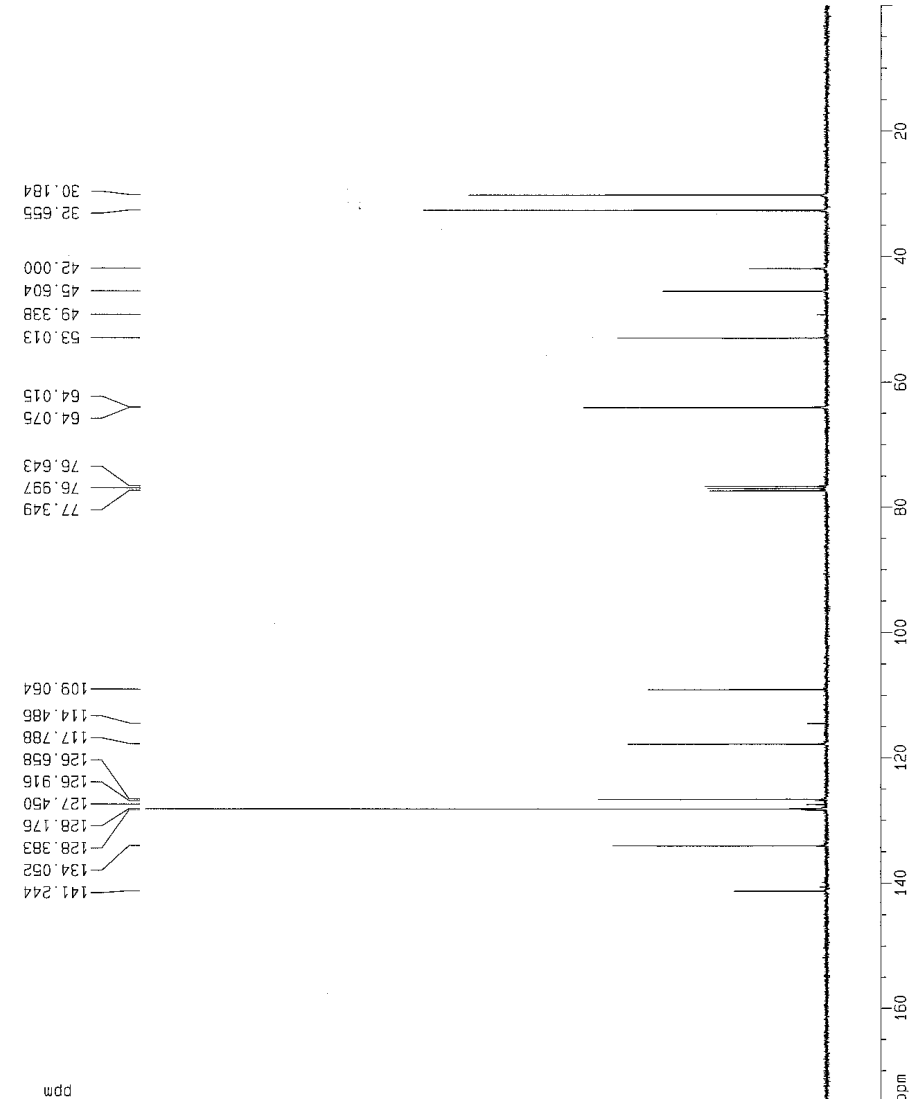

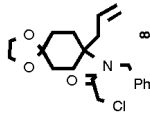

Current Data Parameters  
 NAME Feb22-00-Me1rre  
 EXPNO 10  
 PROCNO 1

F2 - Acquisition Parameters  
 Date\_ 20030222  
 Time\_ 15.17  
 INSTRUM spect  
 PROBRD 5 mm Multinu  
 PULPROG zg30

SOLVENT CDCl3  
 NS 16  
 DS 2  
 SWH 6172.838 Hz  
 FIDRES 0.166300 Hz  
 AQ 2.6542580 sec  
 RG 128  
 DW 81.000 usec  
 DE 6.00 usec  
 TE 300.0 K  
 D1 1.0000000 sec  
 P1 9.60 usec  
 SF01 300.1318534 MHz  
 NUC1 1H  
 PL1 -6.00 dB

F2 - Processing Parameters  
 S1 15364  
 SF 300.1300000 MHz  
 MDM EM  
 SSB 0  
 LB 0.30 Hz  
 GB 0  
 PC 1.00

1D NMR plot parameters  
 CX 20.00 cm  
 F1 8.000 ppm  
 F2 2401.04 Hz  
 F3 0.000 ppm  
 F4 0.00 Hz  
 PPMCM 0.40000 ppm/cm  
 HZCM 120.05200 Hz/cm

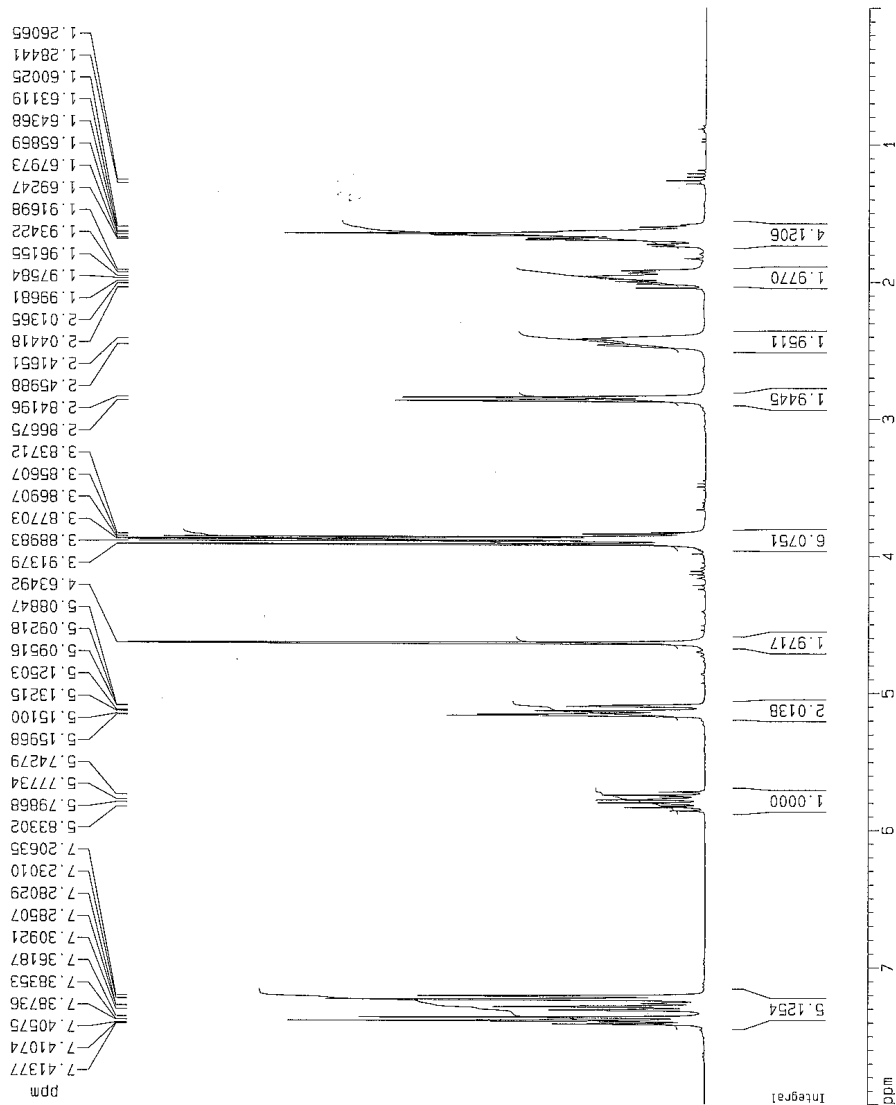

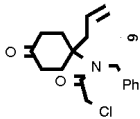

Current Data Parameters  
 NAME Mar05-00-Weinre  
 EXPNO 10  
 PROCNO 1

F2 - Acquisition Parameters  
 Date\_ 20000305  
 Time 7.46  
 INSTRUM spect  
 PROBHD 5 mm QNP 1H  
 PULPROG zg30  
 TD 32768  
 SOLVENT CDCl3  
 NS 16  
 DS 2  
 SWH 7462.687 Hz  
 FIDRES 0.227743 Hz  
 AQ 2.1955061 sec  
 RG 64  
 DM 67.000 usec  
 DE 95.71 usec  
 TE 300.0 K  
 HL1 0 dB  
 D1 1.0000000 sec  
 P1 12.50 usec  
 SFO1 360.1361940 MHz  
 NUCLEUS 1H

F2 - Processing parameters  
 SI 16384  
 SF 360.133837 MHz  
 NQW EM  
 SSB 0  
 LB 0.30 Hz  
 GB 0  
 PC 1.00

1D NMR plot parameters  
 CX 20.00 cm  
 F1P 8.000 ppm  
 F1 2881.07 Hz  
 F2P 0.000 ppm  
 F2 0.00 Hz  
 PPMCM 0.40000 ppm/cm  
 HZCM 144.05357 Hz/cm

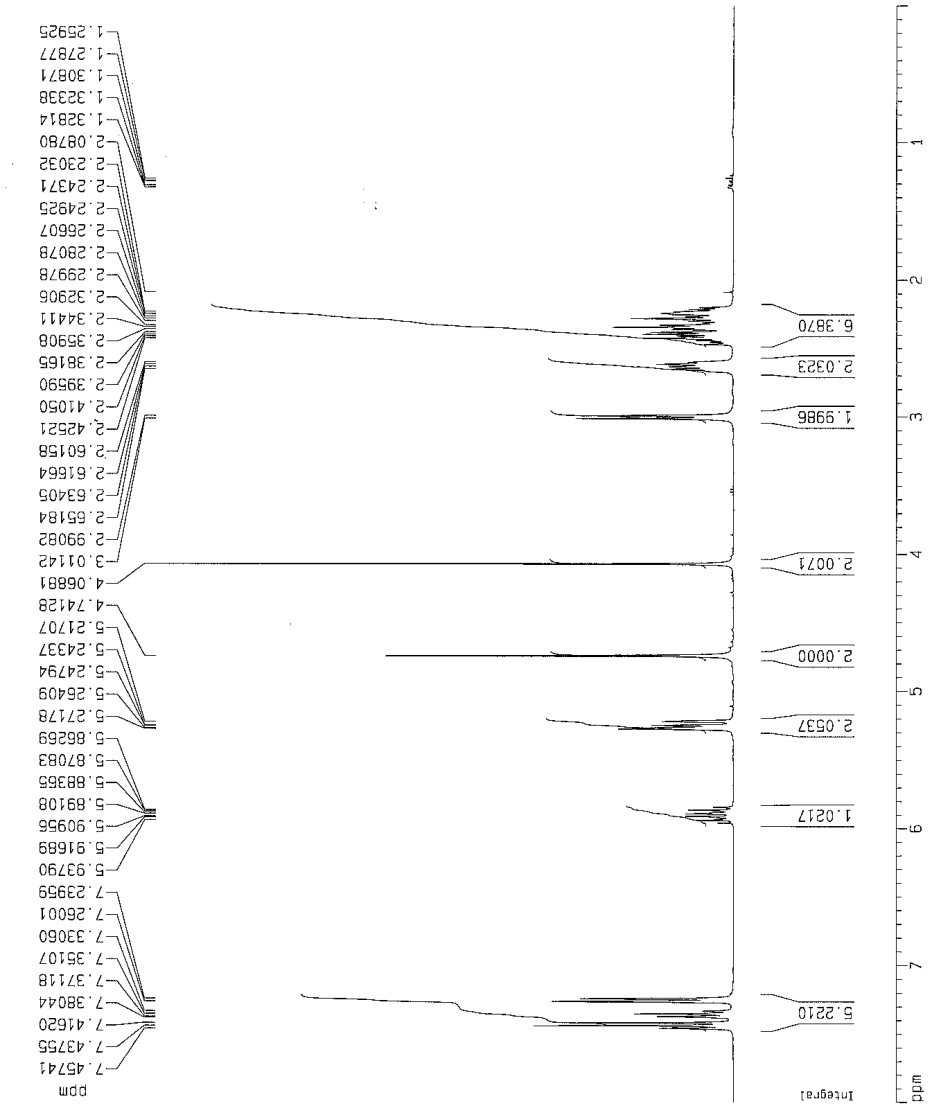

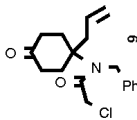

Current Data Parameters  
 NAME Mar06-00-Meirre  
 EXPNO 11  
 PROCNO 1

F2 - Acquisition Parameters  
 Date\_ 20000306  
 Time\_ 7.50  
 INSTRUM spect  
 PROBHD 5 mm QNP 1H  
 PULPROG zgpg30  
 TD 65536  
 SOLVENT CDCl3  
 NS 111  
 DS 2  
 SWH 20411.756 Hz  
 FIDRES 0.448768 Hz  
 AQ 1.1141620 sec  
 RG 32768  
 DW 17.000 usec  
 DE 24.29 usec  
 TE 300.0 K  
 HL1 0 dB  
 D1 2.0000000 sec  
 CHPRG waltz16  
 P31 105.00 usec  
 S4 30 dB  
 O1 0.0300000 sec  
 S2 30 dB  
 P1 8.50 usec  
 SF101 90.5638242 MHz  
 NUCLEUS 13C

F2 - Processing parameters  
 S1 32768  
 SF 90.5657829 MHz  
 NDM EM  
 SSB 0  
 LB 1.00 Hz  
 GB 0  
 PC 1.40

1D NMR plot parameters  
 CX 20.00 cm  
 F1P 220.000 ppm  
 F1 19822.27 Hz  
 F2P 0.000 ppm  
 F2 0.00 Hz  
 PRICK 11.00000 ppm/cm  
 HZCM 996.11365 Hz/cm

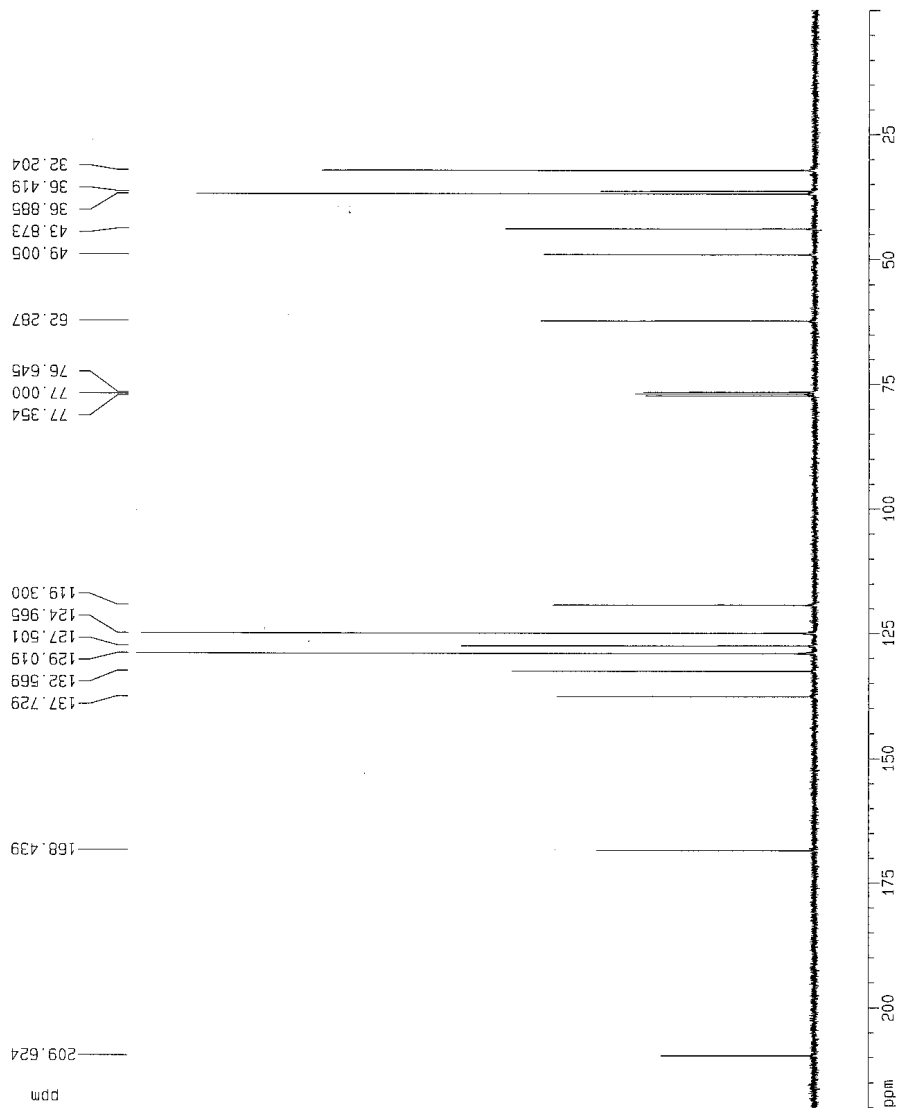

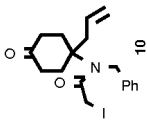

Current Data Parameters  
 NAME Mar09-00-Neoline  
 EXPNO 10  
 PROCNO 1

F2 - Acquisition Parameters  
 Date\_ 20000309\_  
 Time 7.51  
 INSTRUM spect  
 PROBO 5 mm QNP 1H  
 PULPROG zg30  
 TD 32768  
 SOLVENT CDCl3  
 NS 16  
 DS 2  
 SWH 7462.687 Hz  
 FIDRES 0.227743 Hz  
 AQ 2.1955061 sec  
 RG 64  
 DN 67.000 usec  
 DE 95.71 usec  
 TE 300.0 K  
 HL1 0 dB  
 D1 1.00000000 sec  
 P1 12.60 usec  
 SFO1 360.1361940 MHz  
 NUCLEUS 1H

F2 - Processing parameters  
 SI 16384  
 SF 360.1336834 MHz  
 MDW EM  
 SSB 0  
 LB 0.30 Hz  
 GB 0  
 PC 1.00

1D NMR plot parameters  
 CX 20.00 cm  
 F1P 8.000 ppm  
 F1 2881.07 Hz  
 F2P 0.000 ppm  
 F2 0.00 Hz  
 PPMCM 0.40000 ppm/cm  
 HZCM 144.05359 Hz/cm

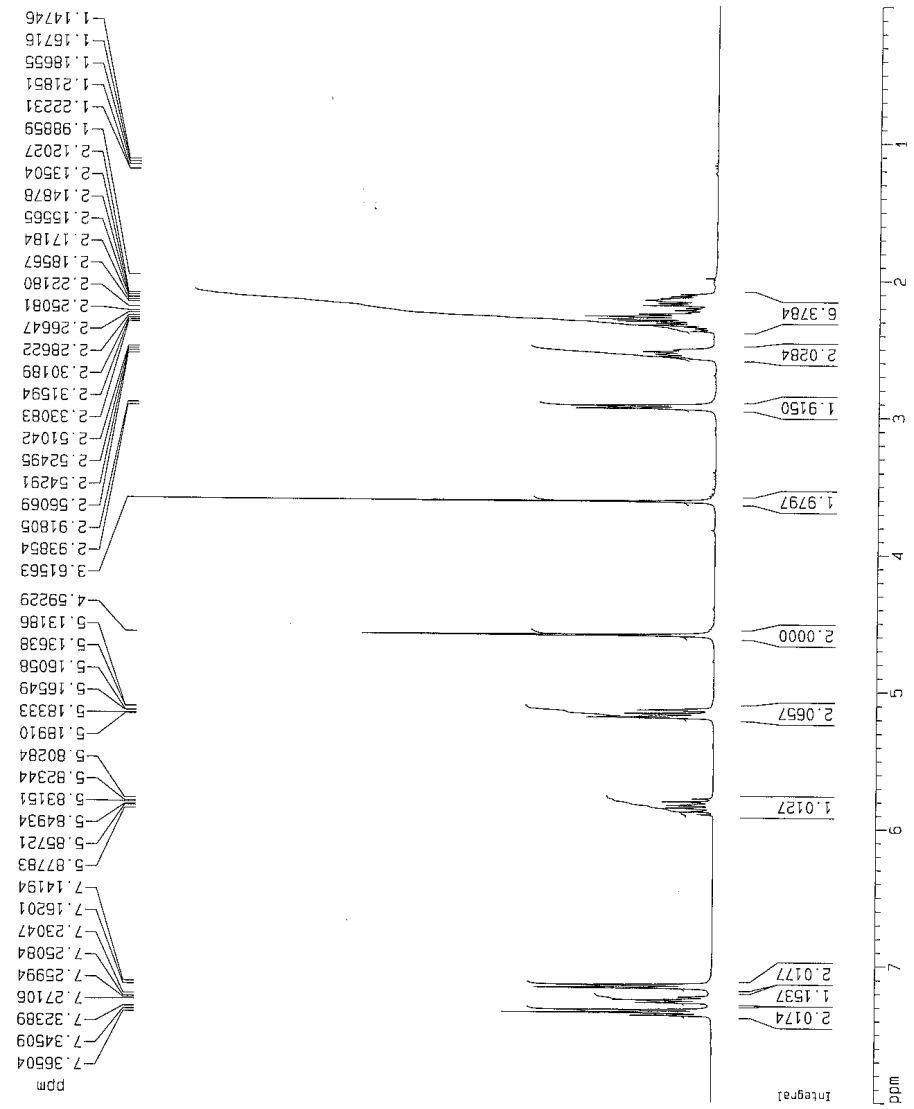

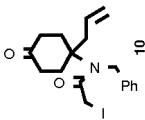

Current Data Parameters  
 NAME Mar09-00-Weinre  
 EXPNO 11  
 PROCNO 1

F2 - Acquisition Parameters  
 Date\_ 20000309  
 Time 7.52  
 INSTRUM spect  
 PROBHD 5 mm QNP 1H  
 PULPROG zgpg30  
 TD 65536  
 SOLVENT CDCl3  
 NS 113  
 DS 2  
 SWH 29411.766 Hz  
 FIDRES 0.448788 Hz  
 AQ 1.1141620 sec  
 RG 32768  
 DM 17.000 usec  
 DE 24.29 usec  
 TE 300.0 K  
 HL1 0 dB  
 D1 2.00000000 sec  
 CPDPRG waltz16  
 P31 106.00 usec  
 S4 30 dB  
 D11 0.03000000 sec  
 S2 30 dB  
 S2 30 dB  
 P1 6.50 usec  
 SF01 30.5638242 MHz  
 NUCLEUS 13C

F2 - Processing parameters  
 SI 32768  
 SF 30.5657165 MHz  
 MDW EM  
 SSB 0  
 LB 1.00 Hz  
 GB 0  
 PC 1.40

1D NMR plot parameters  
 CX 20.00 cm  
 F1P 220.000 ppm  
 F1 19922.27 Hz  
 F2P 10.000 ppm  
 F2 905.55 Hz  
 PPMCM 10.50000 ppm/cm  
 HZCM 950.63563 Hz/cm

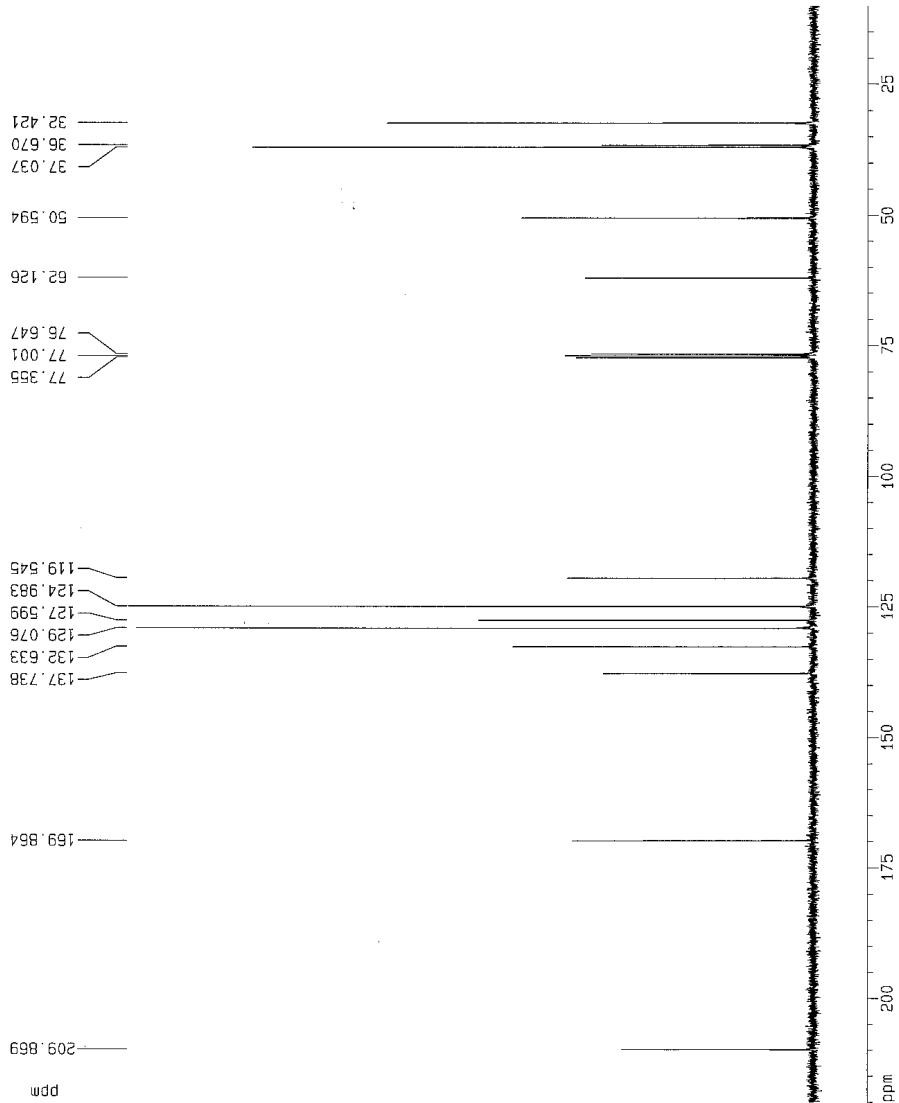



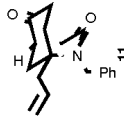

11

Current Data Parameters  
 NAME Mar13-00-Mgine  
 EXPNO 10  
 PROCNO 1

F2 - Acquisition Parameters  
 Date\_ 20000313  
 Time 7:32  
 INSTRUM spect  
 PROBHD 5 mm QNP 1H  
 PULPROG zg30  
 TD 32768  
 SOLVENT DMS-D6  
 NS 16  
 DS 2  
 SWH 7462.667 Hz  
 FIDRES 0.227743 Hz  
 AQ 2.1955061 sec  
 RG 128  
 DN 67.000 usec  
 DE 95.71 usec  
 TE 300.0 K  
 HL1 0 dB  
 D1 1.0000000 sec  
 P1 12.60 usec  
 SFO1 360.1361940 MHz  
 NUCLEUS 1H

F2 - Processing parameters  
 SI 16384  
 SF 360.1339889 MHz  
 NQW EM  
 SSB 0  
 LB 0.30 Hz  
 GB 0  
 PC 1.00

1D NMR plot parameters  
 CA 20.00 cm  
 F1P 8.000 ppm  
 F1 2881.07 Hz  
 F2P 0.000 ppm  
 F2 0.00 Hz  
 PPHCM 0.40000 ppm/cm  
 HZCM 144.05360 Hz/cm

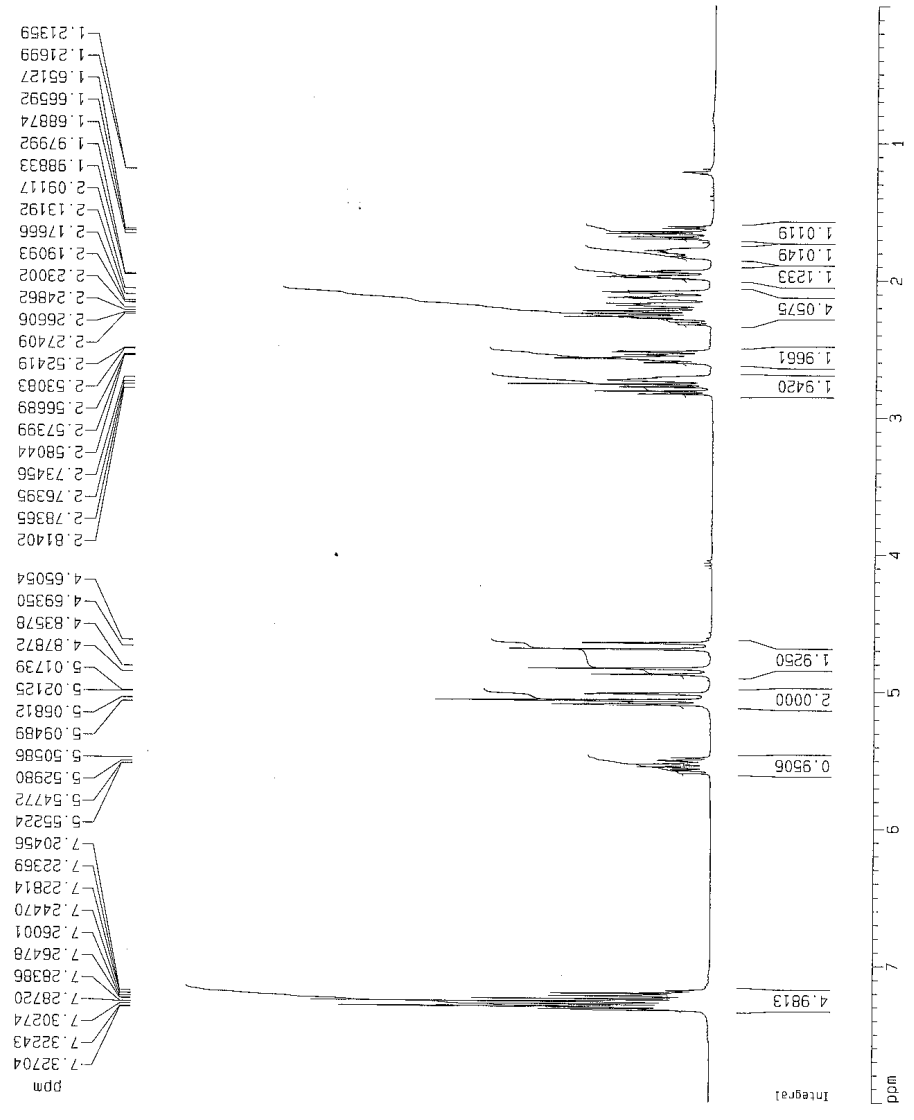

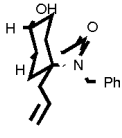

12

Current Data Parameters  
 NAME Nov09-2001-wein  
 EXPNO 20  
 PROCNO 1

F2 - Acquisition Parameters  
 Date\_ 20011109  
 Time 11.47  
 INSTRUM Spect  
 PROBHD 5 mm QNP 1H/1  
 PULPROG zg30  
 TD 65536  
 SOLVENT CDCl<sub>3</sub>  
 NS 16  
 DS 2  
 SWH 6172.639 Hz  
 FIDRES 0.084190 Hz  
 AQ 5.3084660 sec  
 RG 322.5  
 DM 81.000 usec  
 DE 6.00 usec  
 TE 300.0 K  
 D1 1.00000000 sec

==== CHANNEL f1 =====  
 NUC1 1H  
 P1 11.70 usec  
 PL1 0.00 dB  
 SFO1 299.8718518 MHz

F2 - Processing parameters  
 SI 32768  
 SF 299.8700064 MHz  
 WDM EM  
 SSB 0  
 LB 0.30 Hz  
 GB 0  
 PC 1.00

1D NMR plot parameters  
 CX 20.00 cm  
 FIP 7.947 ppm  
 F1 2383.15 Hz  
 F2P 0.678 ppm  
 F2 203.26 Hz  
 PPMCM 0.36347 ppm/cm  
 HZCM 108.99953 Hz/cm

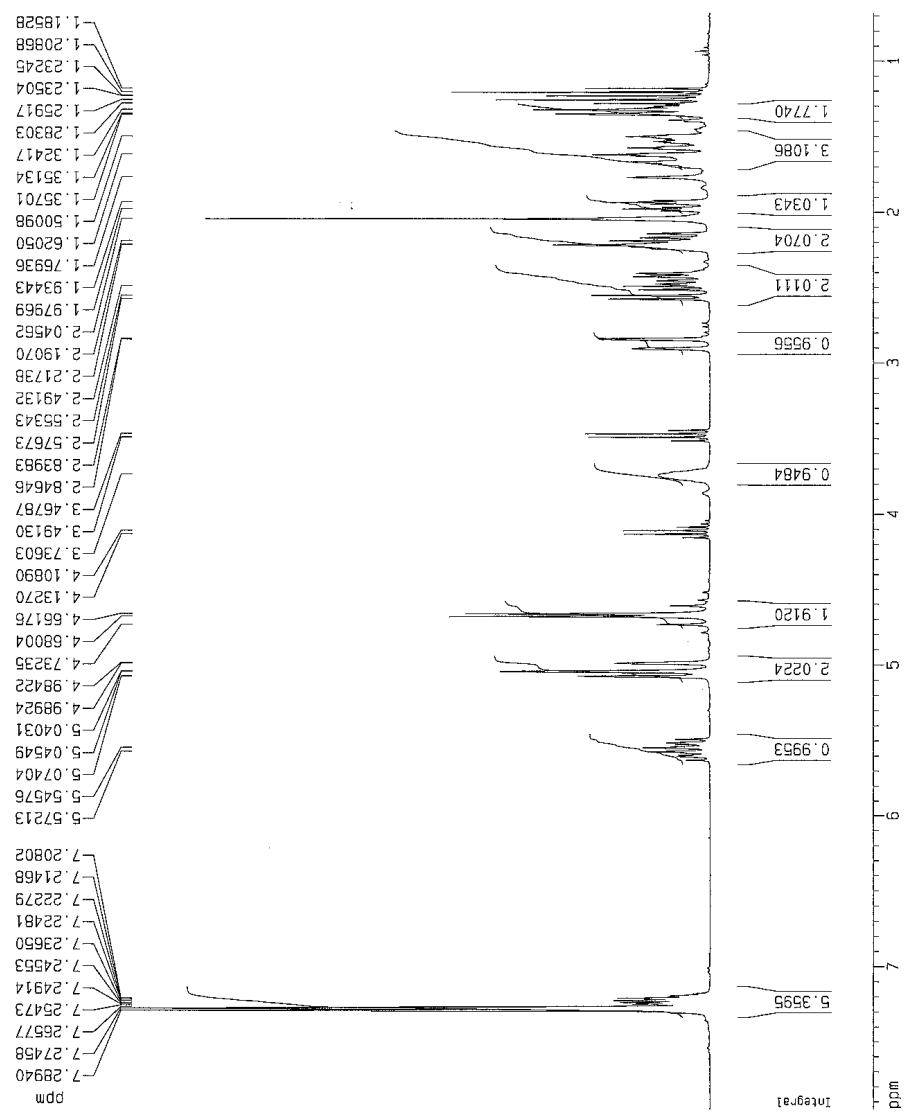

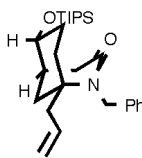

13

Current Data Parameters

NAME Jan14-2002-Wg1.n  
 EXPNO 20  
 PROCNO 1

F2 - Acquisition Parameters

Date\_ 20020114  
 Time 9.54  
 INSTRUM spect  
 PROBHD 5 mm BBI 1H-B  
 PULPROG zg30  
 TD 65536  
 SOLVENT CDCl3  
 NS 16  
 DS 2  
 SWH 8278.146 Hz  
 FIDRES 0.126314 Hz  
 AQ 3.9584243 sec  
 RG 322.5  
 DW 60.400 usec  
 DE 6.00 usec  
 TE 300.0 K  
 D1 1.0000000 sec

===== CHANNEL f1 =====

NUC1 1H  
 P1 6.28 usec  
 PL1 0.00 dB  
 SFO1 400.1324710 MHz

F2 - Processing parameters

SI 32768  
 SF 400.1300375 MHz  
 WDW EM  
 SSB 0  
 LB 0.30 Hz  
 GB 0  
 PC 1.00

1D NMR plot parameters

CX 20.00 cm  
 F1P 7.948 ppm  
 F1 3160.34 Hz  
 F2P -0.203 ppm  
 F2 -81.35 Hz  
 PPMCM 0.40756 ppm/cm  
 HZCM 163.08444 Hz/cm

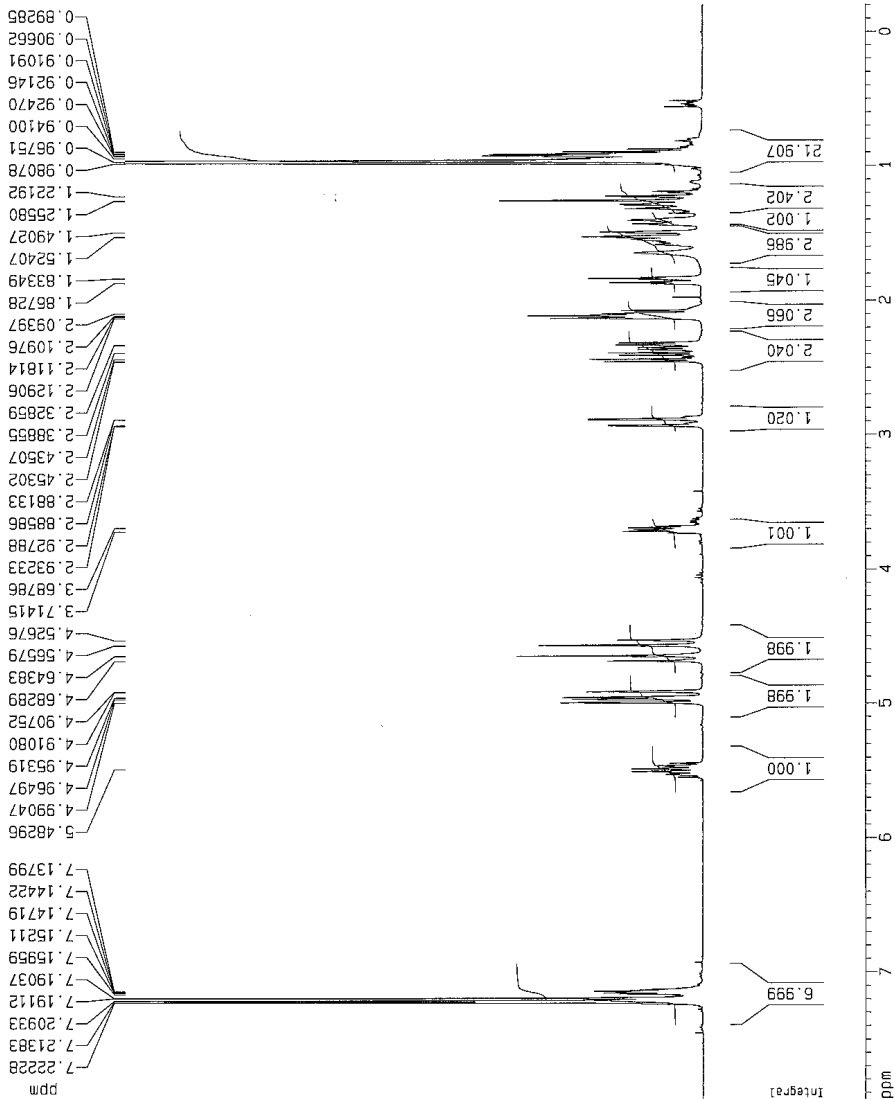

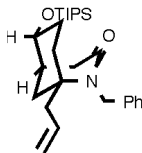

13

Current Data Parameters  
 NAME Dec10-09-Me1rre  
 EXPNO 20  
 PROCNO 1

F2 - Acquisition Parameters

Date\_ 991210  
 Time 8:51  
 INSTRUM spect  
 PROBH0 5 mm QNP 1H  
 PULPROG zgpg30  
 TD 65536  
 SOLVENT CDCl3  
 NS 102  
 DS 2  
 SWH 29411.766 Hz  
 FIDRES 0.448788 Hz  
 AQ 1.1141620 sec  
 RG 32768  
 DW 17.000 usec  
 DE 24.25 usec  
 TE 300.0 K  
 HL 0 dB  
 D1 2.0000000 sec  
 CPDPRG WALTZ16  
 P31 106.00 usec  
 S4 30 dB  
 D11 0.03000000 sec  
 S2 30 dB  
 P1 8.50 usec  
 SF01 90.5638242 MHz  
 NUCLEUS 13C

F2 - Processing parameters

SI 32768  
 SF 90.5557640 MHz  
 EM  
 WDW EM  
 SSB 0  
 LB 1.00 Hz  
 GB 0  
 PC 1.40

1D NMR plot parameters

CX 20.00 cm  
 F1P 180.000 ppm  
 F1 16300.04 Hz  
 F2P 0.000 ppm  
 F2 0.00 Hz  
 PPHCM 9.00000 ppm/cm  
 HZCM 815.00189 Hz/cm

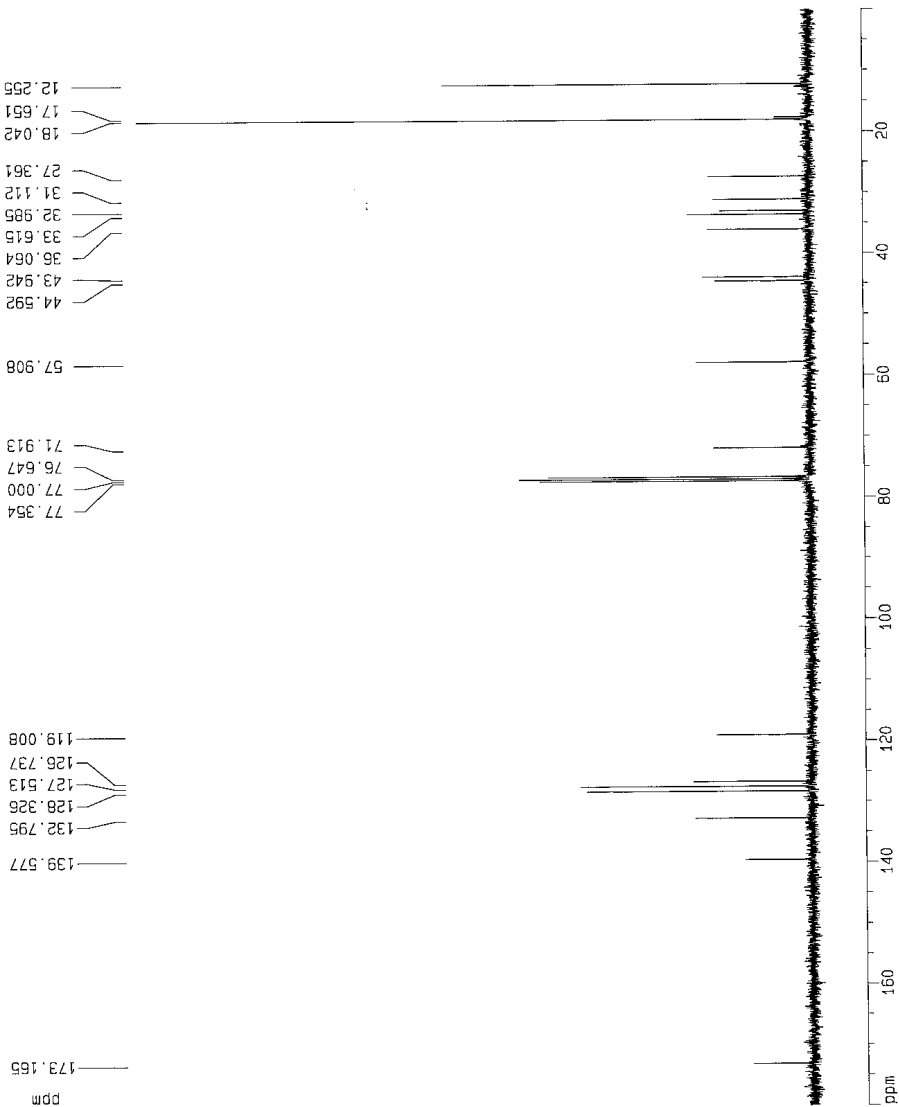

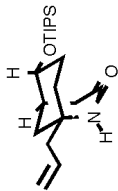

15

Current Data Parameters  
 NAME Jan21-00-Weirine  
 EXPNO 10  
 PROCNO 1

F2 - Acquisition Parameters  
 Date\_ 20000121  
 Time 7.53  
 INSTRUM spect  
 PROBHD 5 mm QNP 1H  
 PULPROG zg30  
 TD 32768  
 SOLVENT CDCl3  
 NS 16  
 DS 2  
 SWH 7462.687 Hz  
 FIDRES 0.227743 Hz  
 AQ 2.1955051 sec  
 RG 64  
 DM 67.000 usec  
 DE 95.71 usec  
 TE 300.0 K  
 HL 0 dB  
 D1 1.00000000 sec  
 P1 12.60 usec  
 SF01 360.1367940 MHz  
 NUCLEUS 1H

F2 - Processing parameters  
 S1 16384  
 SF 360.1339939 MHz  
 EQ EM  
 SSB 0  
 LB 0.30 Hz  
 GB 0  
 PC 1.00

1D NMR plot parameters  
 CX 20.00 cm  
 F1P 8.000 ppm  
 F1 2881.07 Hz  
 F2P 0.000 ppm  
 F2 0.00 Hz  
 PPMCM 0.40000 ppm/cm  
 HZCM 144.05359 Hz/cm

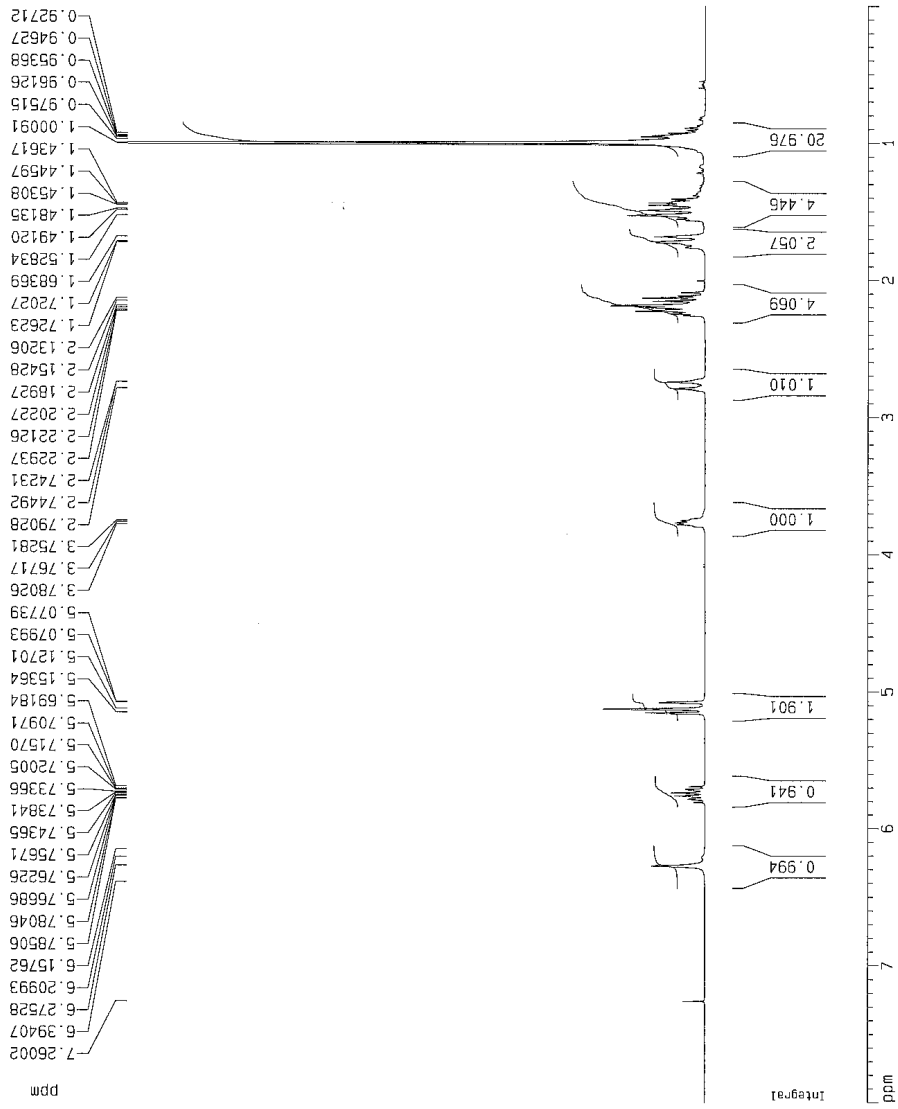

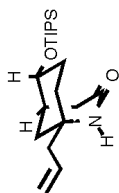

15

Current Data Parameters  
 NAME Jan21-00-Me.inre  
 EXPNO 20  
 PROCNO 1

F2 - Acquisition Parameters  
 Date\_ 20000121  
 Time\_ 8.19  
 INSTRUM spect  
 PROCNO 5 mm QNP 1H  
 PULPROG zgpg30  
 TD 65536  
 SOLVENT CDCl3  
 NS 297  
 DS 2  
 SWH 29411.766 Hz  
 FIDRES 0.446788 Hz  
 AQ 1.1141620 sec  
 RG 32768  
 DW 17.000 usec  
 DE 24.29 usec  
 TE 300.0 K  
 HL1 0 dB  
 D1 2.0000000 sec  
 CPDPRG walz16  
 P31 106.00 usec  
 S4 30 dB  
 D11 0.0300000 sec  
 S2 30 dB  
 P1 6.50 usec  
 SP01 90.5632242 MHz  
 NUCLEUS 13C

F2 - Processing parameters  
 SI 32768  
 SF 90.5657667 MHz  
 HNMR EM  
 SSB 0  
 LB 1.00 Hz  
 GB 0  
 PC 1.40

1D NMR plot parameters  
 EX 20.00 cm  
 F1P 200.000 ppm  
 F1 18111.15 Hz  
 F2P 0.000 ppm  
 F2 0.00 Hz  
 PPMCM 10.00000 ppm/cm  
 HZCM 905.55762 Hz/cm

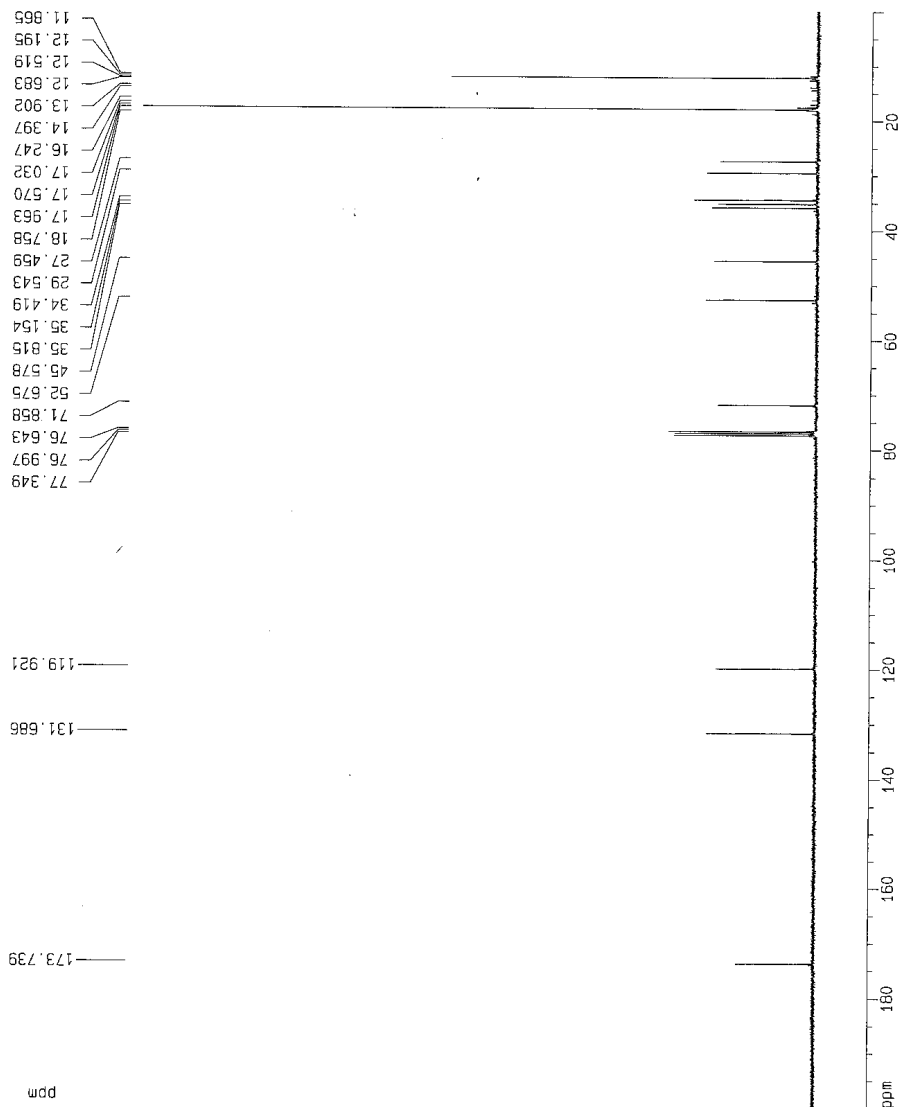

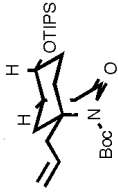

16

Current Data Parameters  
 NAME Jan21-2002-Me1n  
 EXPNO 10  
 PROCNO 1  
 F2 - Acquisition Parameters  
 Date\_ 20020121  
 Time 9.33  
 INSTRUM spect  
 PROBHD 5 mm QNP 1H/1  
 PULPROG zg30  
 TO 65536  
 SOLVENT CDCl3  
 NS 16  
 DS 2  
 SWH 6172.839 Hz  
 FIDRES 0.094190 Hz  
 AQ 5.3084660 sec  
 RG 512  
 Dh 81.000 usec  
 DE 6.00 usec  
 TE 300.0 K  
 D1 1.00000000 sec  
 \*\*\*\*\* CHANNEL f1 \*\*\*\*\*  
 NUC1 1H  
 P1 11.70 usec  
 PL1 0.00 dB  
 SFO1 299.8718519 MHz  
 F2 - Processing parameters  
 SI 32768  
 SF 299.8700000 MHz  
 WDW EPI  
 SSB 0  
 LB 0.30 Hz  
 GB 0  
 PC 1.00  
 1D NMR plot parameters  
 CX 20.00 cm  
 F1P 6.018 ppm  
 F1 1804.48 Hz  
 F2P 0.351 ppm  
 F2 105.16 Hz  
 PPMCH 0.28334 ppm/cm  
 HZCM 84.96650 Hz/cm

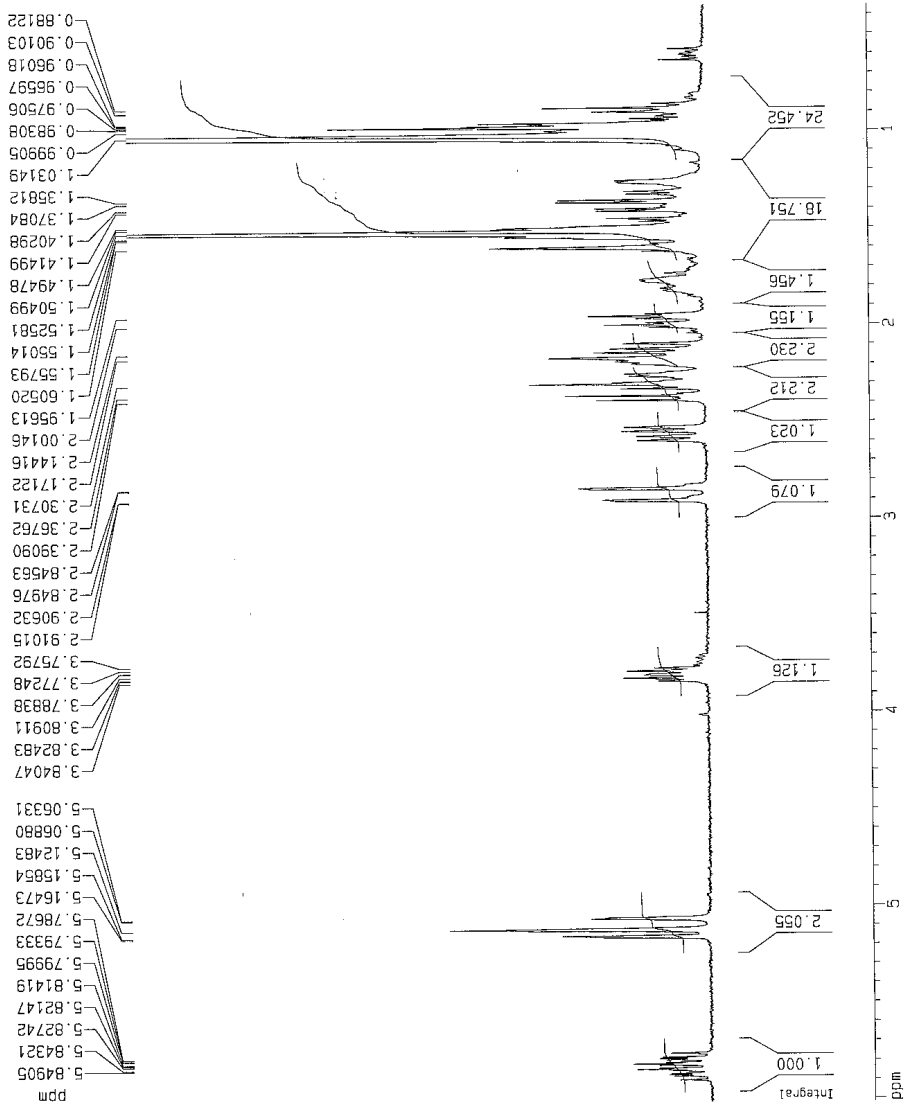

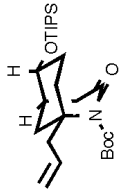

16

Current Data Parameters  
 NAME Jan21-2002-M61.n  
 EXPNO 10  
 PROCNO 1

F2 - Acquisition Parameters  
 Date\_ 20020121  
 Time 13.53  
 INSTRUH spect  
 PROBHD 5 mm BB1 1H-B  
 PULPROG zgpg30  
 TD 65536  
 SOLVENT CDCl3  
 NS 244  
 DS 4  
 SWH 25125.629 Hz  
 FIDRES 0.393387 Hz  
 AQ 1.3042164 sec  
 RG 3649.1  
 DM 19.900 usec  
 DE 6.00 usec  
 TE 300.0 K  
 D1 2.0000000 sec  
 d11 0.0300000 sec  
 d12 0.0002000 sec

\*\*\*\*\* CHANNEL f1 \*\*\*\*\*  
 NUC1 13C  
 P1 16.15 usec  
 PL1 -6.00 dB  
 SF01 100.627717 MHz

\*\*\*\*\* CHANNEL f2 \*\*\*\*\*  
 CPDPRG2 waltz16  
 NUC2 1H  
 P2 113.00 usec  
 PL2 0.00 dB  
 PL12 24.00 dB  
 PL13 24.00 dB  
 SF02 400.1316005 MHz

F2 - Processing parameters  
 SI 32768  
 SF 100.612717 MHz  
 KDM EM  
 SSB 0  
 LB 1.00 Hz  
 GB 0  
 PC 1.40

1D IMF plot parameters  
 CX 20.00 cm  
 F1P 177.585 ppm  
 F1 17868.44 Hz  
 F2P 6.227 ppm  
 F2 626.55 Hz  
 PPMCH B.56844 ppm/cm  
 HZCM 862.09491 Hz/cm

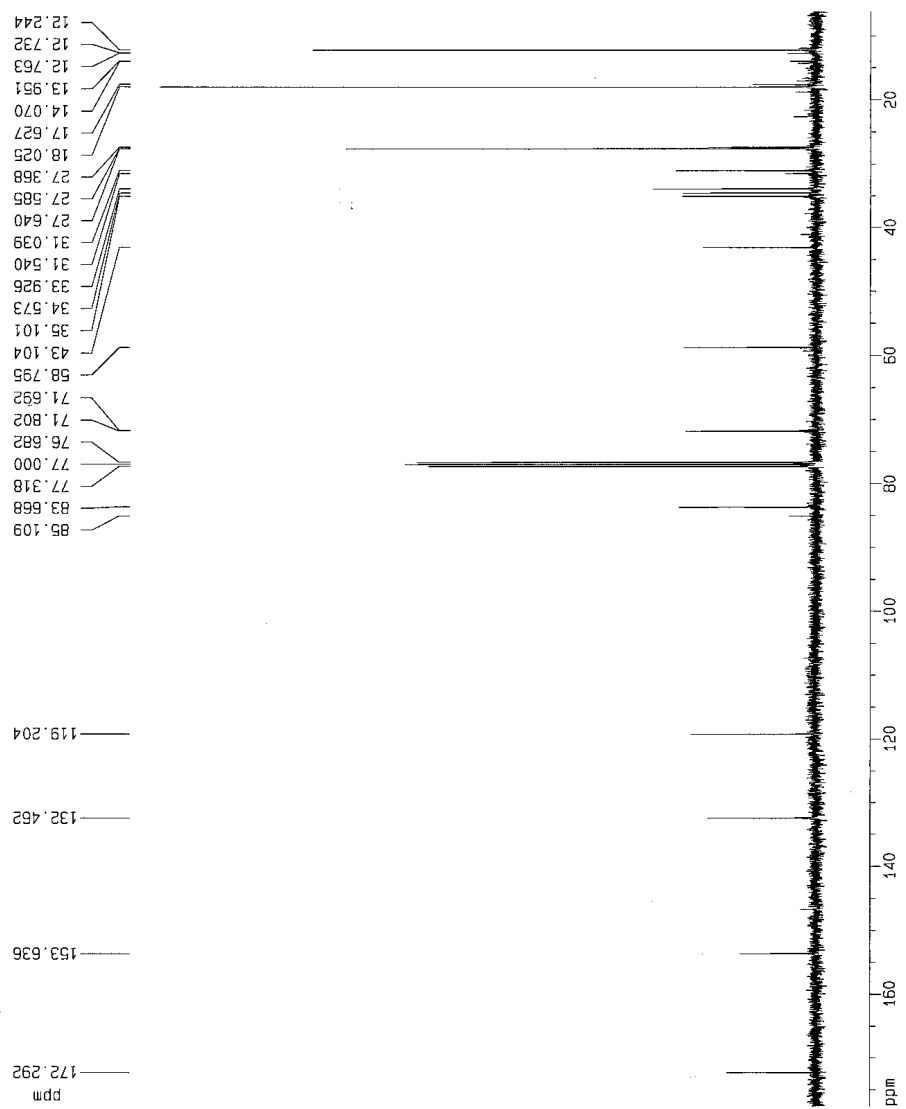



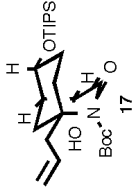

Current Data Parameters  
 NAME Jan29-2002-We.in  
 EXPNO 20  
 PROCNO 1

F2 - Acquisition Parameters  
 Date\_ 20020129  
 Time 15:54  
 INSTRUM spect  
 PROBHD 5 mm Multinu  
 PULPROG zg30  
 TD 65536  
 SOLVENT CDCl3  
 NS 16  
 DS 2  
 SWH 6172.839 Hz  
 FIDRES 0.064190 Hz  
 AQ 5.3064660 sec  
 RG 287.4  
 DM 81.000 usec  
 DE 6.00 usec  
 TE 300.0 K  
 D1 1.0000000 sec

===== CHANNEL f1 =====  
 NUC1 1H  
 P1 9.80 usec  
 PL1 -6.00 dB  
 SFO1 300.1316534 MHz

F2 - Processing parameters  
 SI 32768  
 SF 300.1300062 MHz  
 WDM EM  
 SSB 0  
 LB 0.30 Hz  
 GB 0  
 PC 1.00

1D NMR plot parameters  
 CX 20.00 cm  
 F1P 6.104 ppm  
 F1 1832.12 Hz  
 F2P 0.744 ppm  
 F2 223.24 Hz  
 PPMCM 0.26804 ppm/cm  
 HZCM 80.44561 Hz/cm

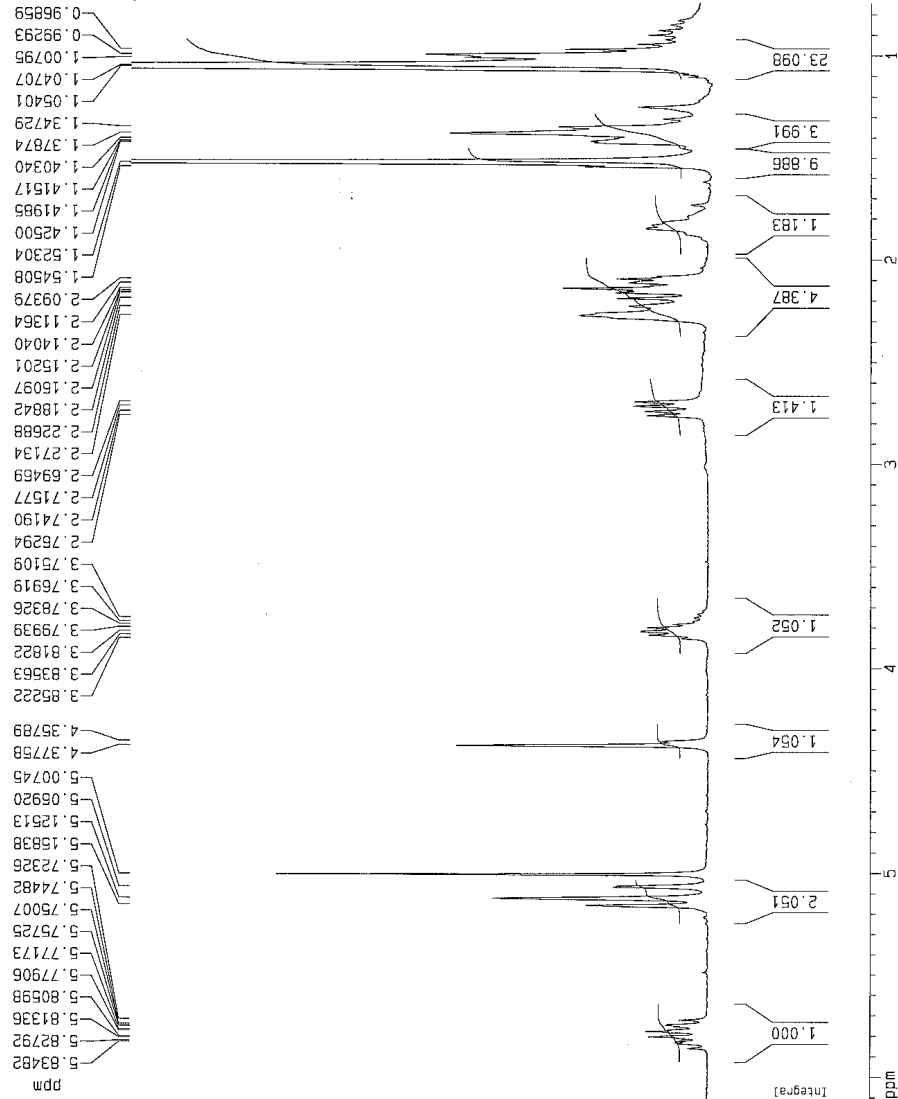

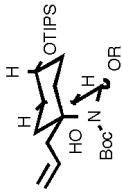

19

Current Data Parameters  
 NAME May31-00-WeIrrc  
 EXPNO 10  
 PROCNO 1

F2 - Acquisition Parameters  
 Date\_ 20000531  
 Time\_ 8.56  
 INSTRUM spect  
 PROBHD 5 mm Multino  
 PULPROG zg30  
 TD 32768  
 SOLVENT CDCl3  
 NS 16  
 DS 2  
 SWH 6172.839 Hz  
 FIDRES 0.188380 Hz  
 AQ 2.6542580 sec  
 RG 323.5  
 DW 61.000 usec  
 DE 6.00 usec  
 TE 300.0 K  
 D1 1.00000000 sec  
 P1 9.60 usec  
 SFO1 300.1318534 MHz  
 NUC1 1H  
 PL1 -6.00 dB

F2 - Processing parameters  
 SI 16384  
 SF 300.130060 MHz  
 XDM EM  
 SSB 0  
 LB 0.30 Hz  
 GB 0  
 PC 1.00

1D NMR plot parameters  
 CX 20.00 cm  
 FXP 8.000 ppm  
 F1 2401.04 Hz  
 F2 0.000 ppm  
 F2 0.00 Hz  
 PPMCM 0.40000 ppm/cm  
 XZCM 120.05200 Hz/cm

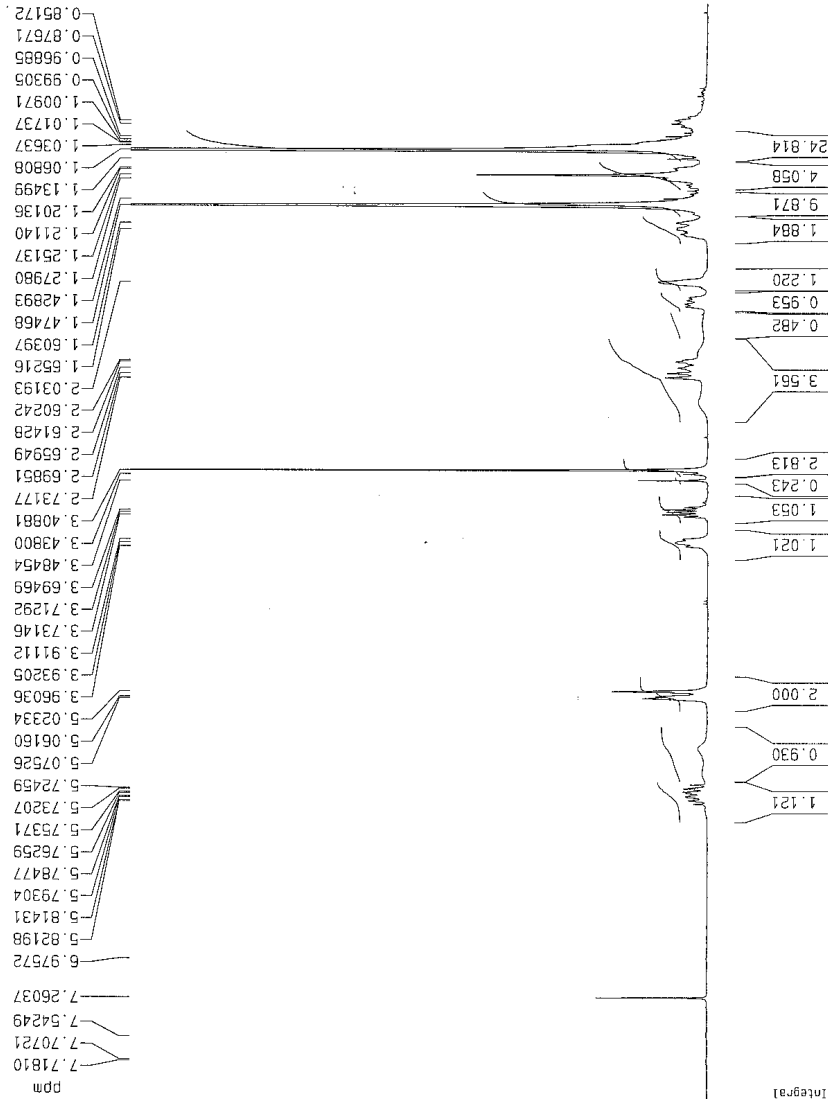

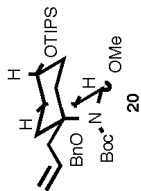

Current Data Parameters  
 NAME F8022-2001-Me1n  
 EXPNO 35  
 PROCNO 1

F2 - Acquisition Parameters  
 Date\_ 20010222  
 Time 15.11  
 INSTRUM spect  
 PROBHD 5 mm Multinu  
 PULPROG zg30  
 TD 65536  
 SOLVENT TDI  
 NS 16  
 DS 2  
 SMH 6172.614 Hz  
 FIDRES 0.094190 Hz  
 AG 5.3084874 sec  
 RG 35.9  
 DM 81.000 usec  
 DE 6.00 usec  
 TE 300.0 K  
 D1 1.0000000 sec

\*\*\*\*\* CHANNEL f1 \*\*\*\*\*  
 NUC1 1H  
 P1 9.80 usec  
 PL1 -6.00 dB  
 SFO1 300.1306418 MHz

F2 - Processing parameters  
 SI 32768  
 SF 300.1284971 MHz  
 WDW no  
 SSB 0  
 LB 0.00 Hz  
 GB 0  
 PC 1.00

1D NMR plot parameters  
 CX 20.00 cm  
 FJP 8.000 ppm  
 F1 2401.03 Hz  
 F2 0.000 ppm  
 F2 0.00 Hz  
 PPMCM 0.40000 ppm/cm  
 HZCM 120.05141 Hz/cm

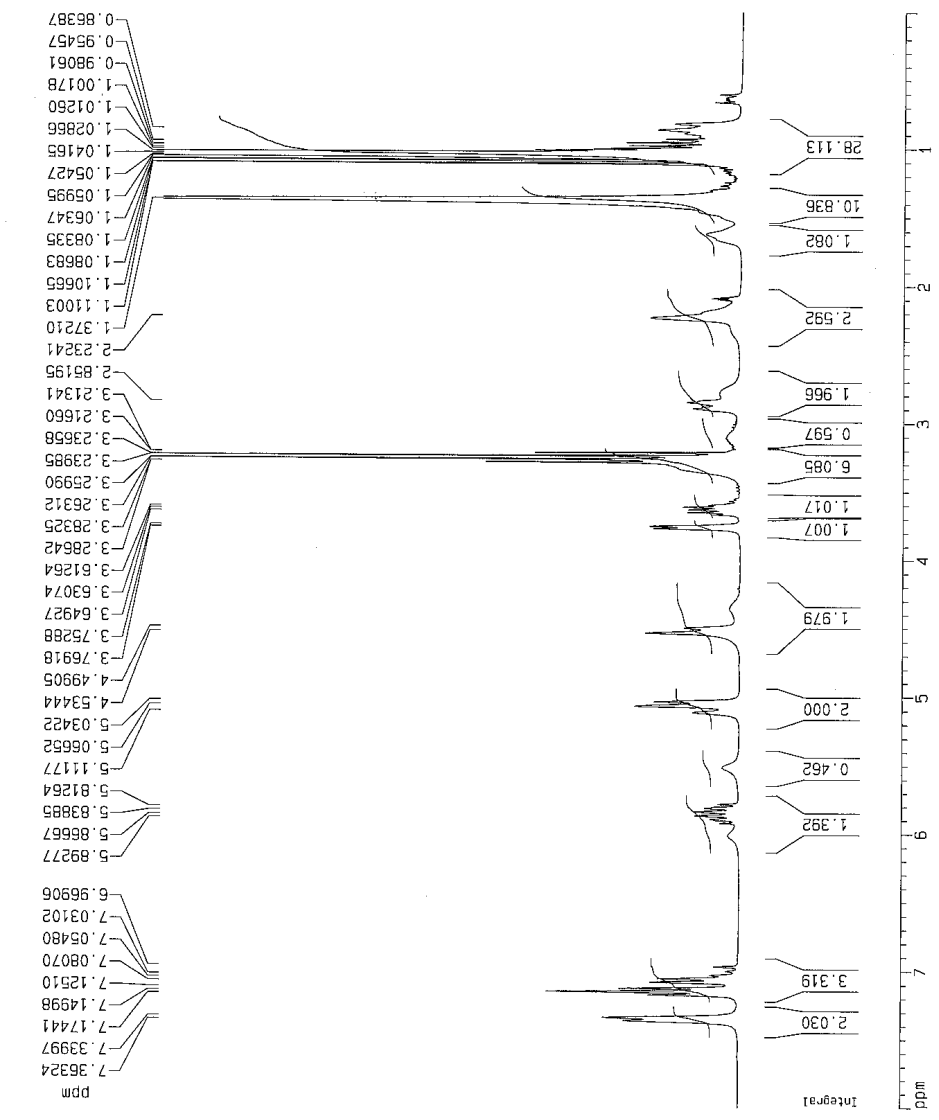

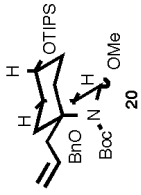

Current Data Parameters  
 NAME Feb22-2001-Main  
 EXPNO 48  
 PROCNO 1

F2 - Acquisition Parameters  
 Date\_ 20010222  
 Time 16.44  
 INSTRUM spect  
 PROBHD 5 mm Multinu  
 PULPROG zgpg30  
 TD 65536  
 SOLVENT T01  
 NS 873  
 DS 4  
 SWH 18832.383 Hz  
 FIDRES 0.287350 Hz  
 AQ 1.7400308 sec  
 RG 8132  
 DM 26.550 usec  
 DE 6.00 usec  
 TE 300.0 K  
 D1 2.0000000 sec  
 d11 0.0300000 sec  
 d12 0.0000200 sec

===== CHANNEL f1 =====  
 NUC1 13C  
 P1 5.60 usec  
 PL1 -6.00 dB  
 SF01 75.4760200 MHz

===== CHANNEL f2 =====  
 CPDPRG2 waltz16  
 NUC2 1H  
 P2 11.40 usec  
 PL2 -6.00 dB  
 PL12 18.00 dB  
 PL13 18.00 dB  
 SF02 300.1312005 MHz

F2 - Processing parameters  
 SI 32768  
 SF 75.4677085 MHz  
 WDW 0  
 SSB 0  
 LB 0.00 Hz  
 GB 0  
 PC 1.40

1D NMR Plot parameters  
 CX 20.00 cm  
 F1P 180.000 ppm  
 F1 13594.19 Hz  
 F2P 0.000 ppm  
 F2 0.00 Hz  
 PPMCK 9.00000 ppm/cm  
 HZCK 819.20935 Hz/cm

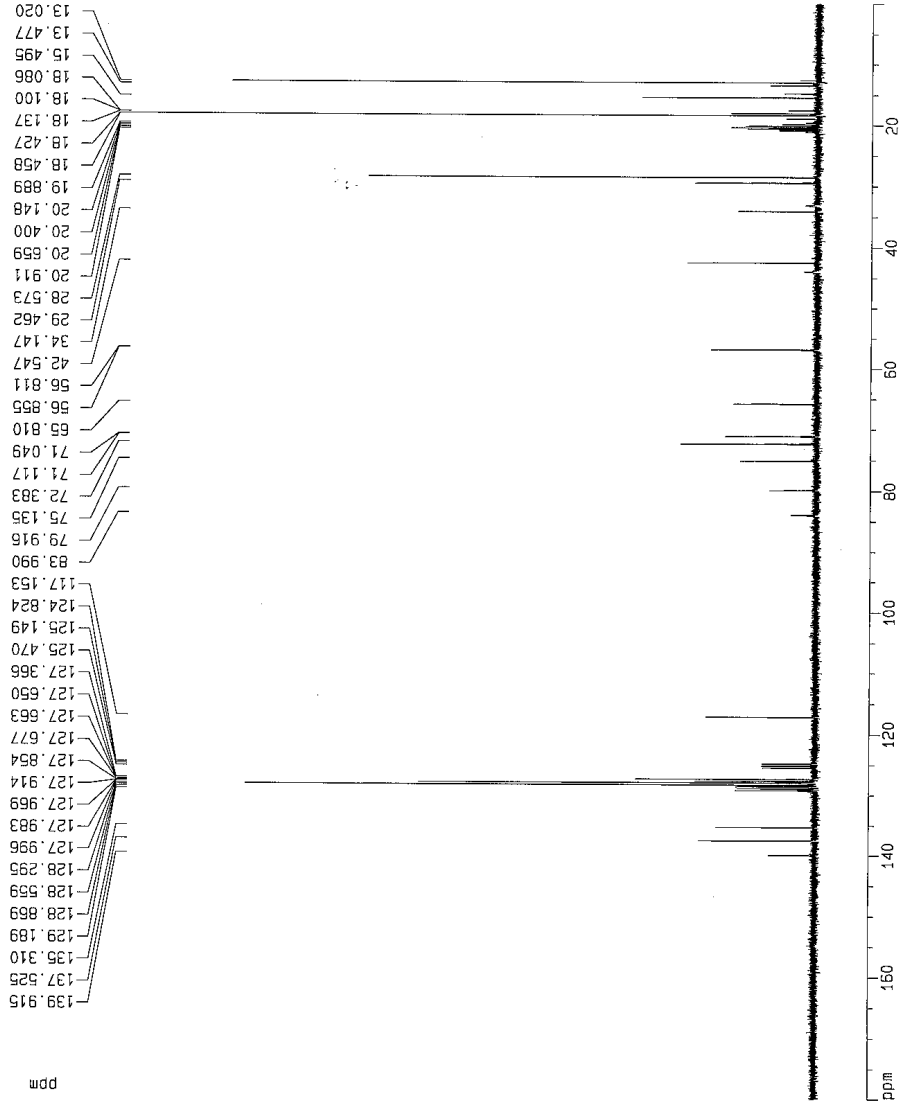

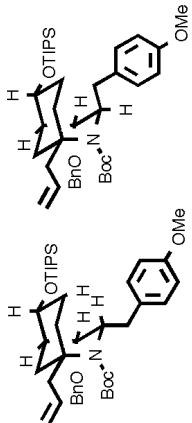

Current Data Parameters  
 NAME Metmeb-2-7-20  
 EXPNO 15  
 PROCNO 1

F2 - Acquisition Parameters  
 Date\_ 20010207  
 Time 14.55  
 INSTRUM spect  
 PROBHD 5 mm GNP 1H/1  
 PULPROG zg30  
 TD 65536  
 SOLVENT CDCl3  
 NS 16  
 DS 2  
 SWH 6172.839 Hz  
 FTIDRES 0.094190 Hz  
 AQ 5.3054660 sec  
 RG 101.6  
 DM 81.000 usec  
 DE 6.00 usec  
 TE 300.0 K  
 D1 1.00000000 sec

===== CHANNEL f1 =====  
 NUC1 1H  
 P1 11.70 usec  
 PL1 0.00 dB  
 SF01 299.8718518 MHz

F2 - Processing parameters  
 SI 32768  
 SF 299.8700899 MHz  
 WDW nd  
 SSB 0  
 LB 0.00 Hz  
 GB 0  
 PC 1.00

1D NMR plot parameters  
 CX 20.00 cm  
 F1P 8.000 ppm  
 F1 2399.96 Hz  
 F2P 0.000 ppm  
 F2 0.00 Hz  
 PPKM 0.40000 ppm/cm  
 HZCM 119.94800 Hz/cm

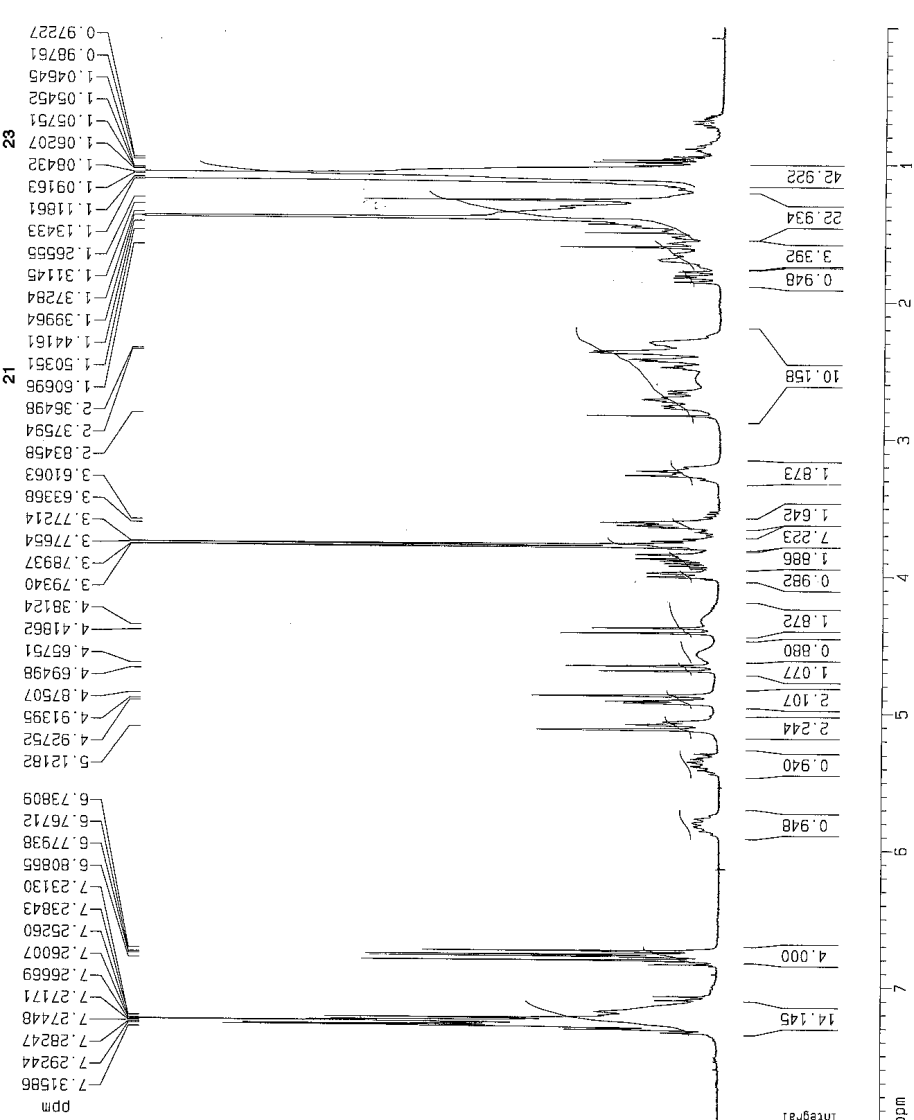

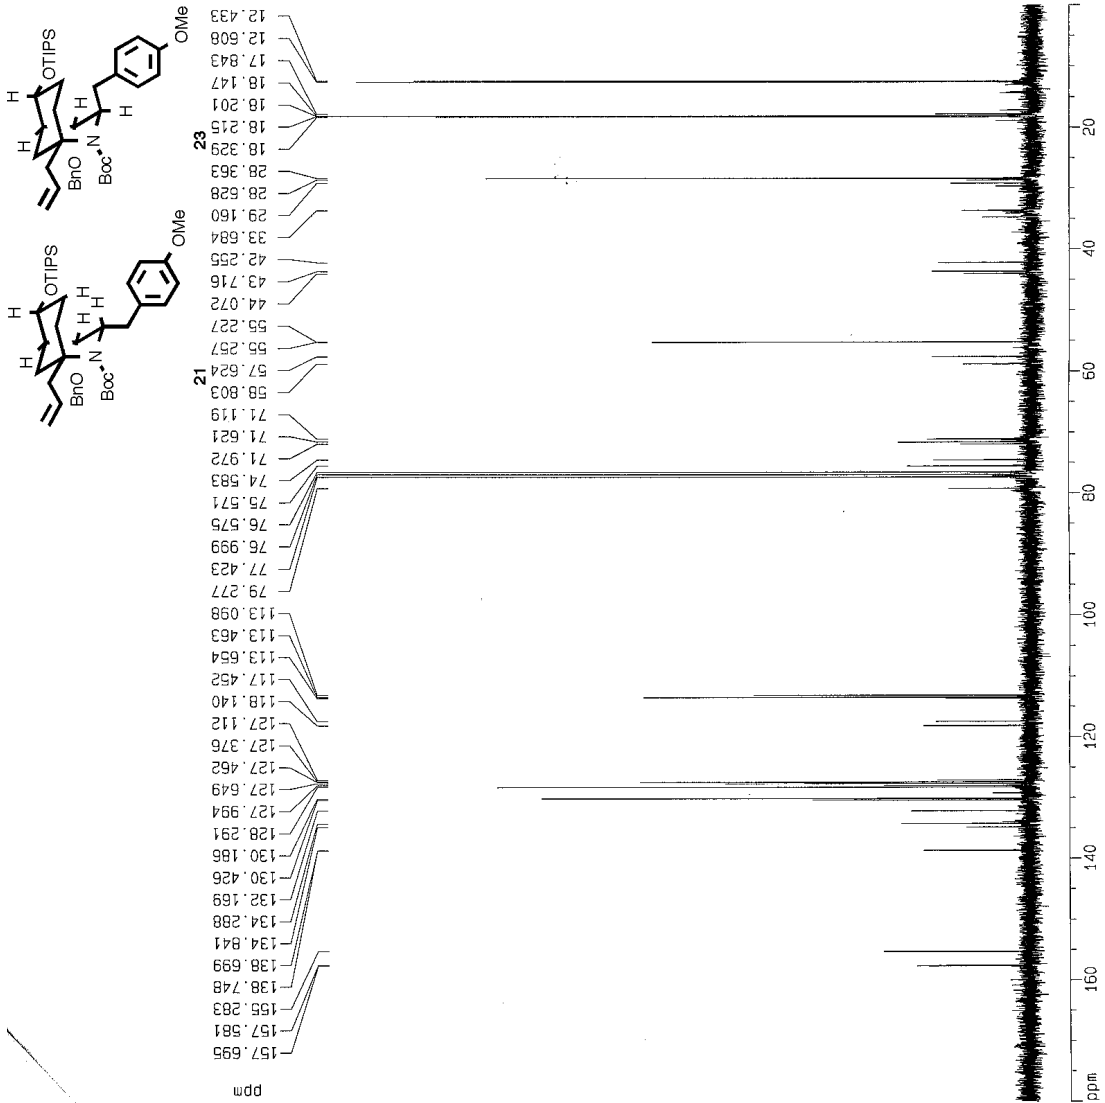

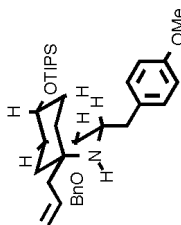

Current Data Parameters  
 NAME Sep16-2004-Me1n  
 EXPNO 40  
 PROCNO 1

F2 - Acquisition Parameters  
 Date\_ 20040816  
 Time 16:37  
 INSTRUM spect  
 PROBRD 5 mm Multinu  
 PULPROG zg30  
 TD 65536  
 SOLVENT CDCl3  
 NS 16  
 DS 2  
 SWH 6172.838 Hz  
 FIDRES 0.094190 Hz  
 AQ 5.3084860 sec  
 RG 143.7  
 DM 61.000 usec  
 DE 6.00 usec  
 TE 300.0 K  
 D1 1.0000000 sec

===== CHANNEL f1 =====  
 NUC1 1H  
 P1 9.60 usec  
 PL1 -6.00 dB  
 SFO1 300.1310554 MHz

F2 - Processing parameters  
 SI 32768  
 SF 300.1300308 MHz  
 WDW EM  
 SSB 0  
 LB 0.30 Hz  
 GB 0  
 PC 1.00

1D NMR plot parameters  
 CX 20.00 cm  
 F1P 5.039 ppm  
 F1 2442.76 Hz  
 F2P -0.002 ppm  
 F2 -0.72 Hz  
 PPMCM 0.40208 ppm/cm  
 HZCM 120.67487 Hz/cm

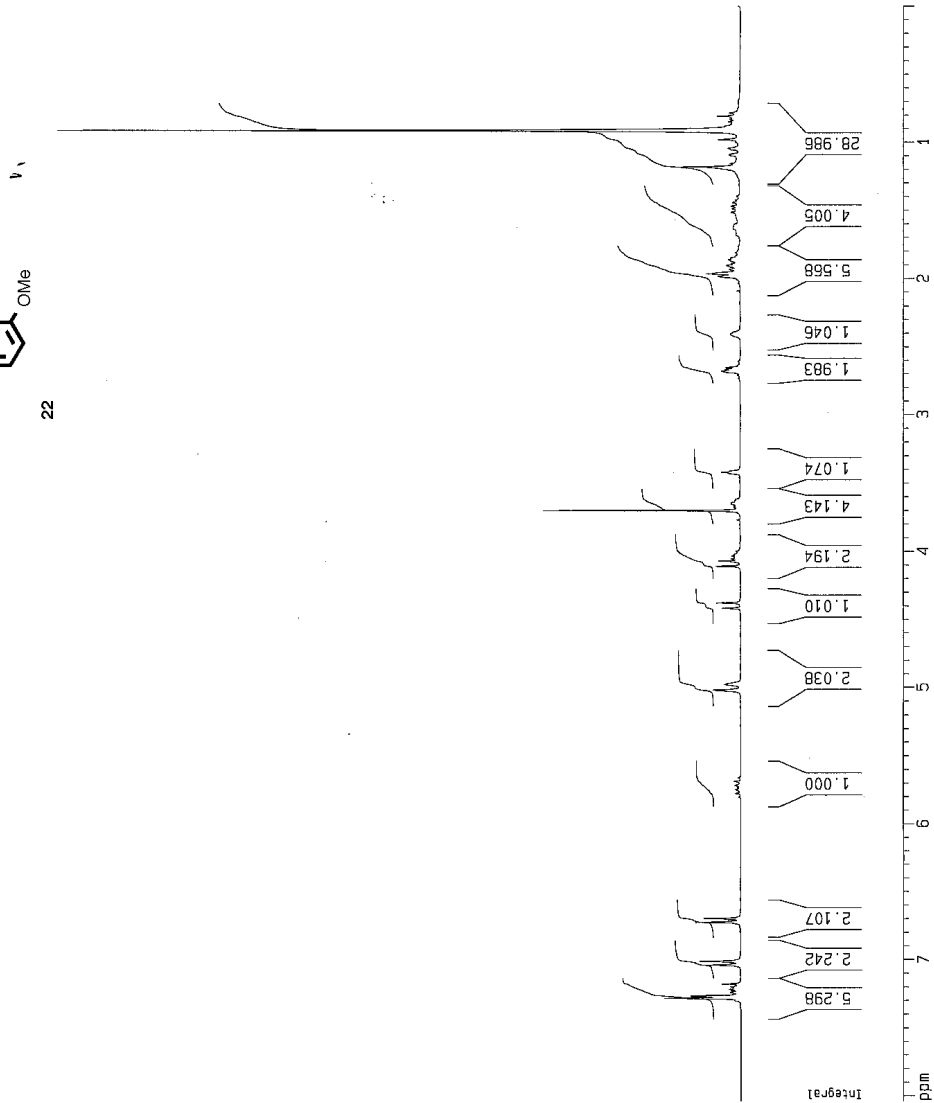

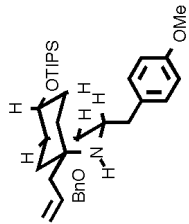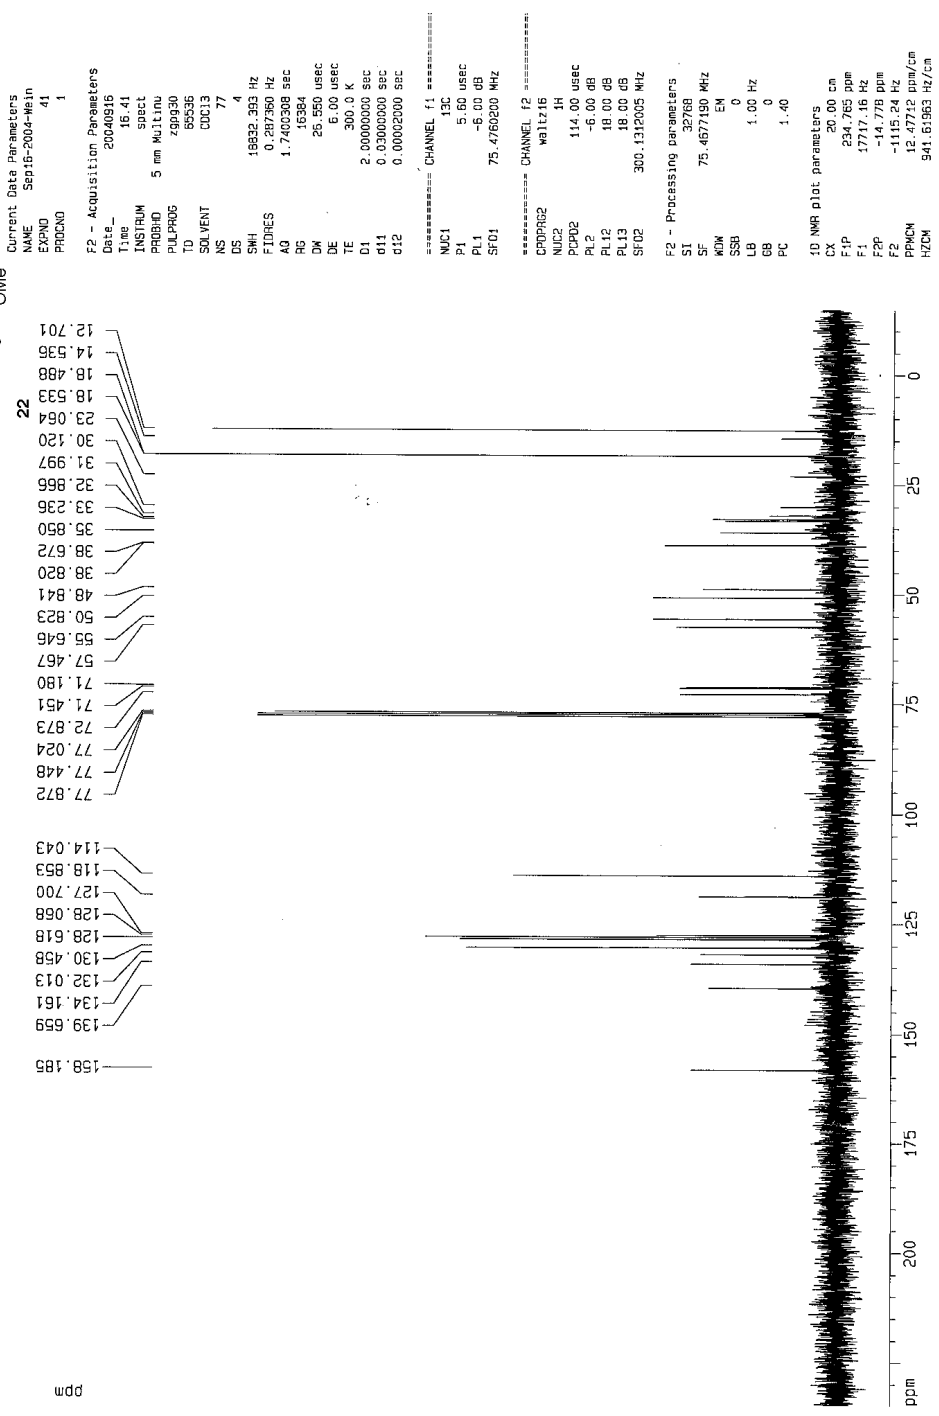



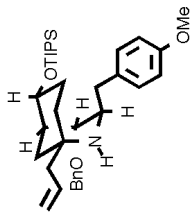

Current Data Parameters  
 NAME Sep18-2004-wein  
 EXPNO 30  
 PROCNO 1

F2 - Acquisition Parameters  
 Date\_ 20040816  
 Time 15.22  
 INSTRUM spect  
 PROBHD 5 mm Multino  
 PULPROG zgpg30  
 TD 65536  
 SOLVENT CDCl3  
 NS 15  
 DS 2  
 SWH 6172.839 Hz  
 FIDRES 0.084190 Hz  
 AQ 5.3084660 sec  
 RG 90.5  
 DW 81.000 usec  
 DE 6.00 usec  
 TE 300.0 K  
 D1 1.0000000 sec

===== CHANNEL f1 =====  
 NUC1 1H  
 P1 9.60 usec  
 PL1 -6.00 dB  
 SF01 300.1318534 MHz

F2 - Processing parameters  
 SI 32768  
 SF 300.1300293 MHz  
 MDN EM  
 SSB 0  
 LB 0.30 Hz  
 GB 0  
 PC 1.00

1D NMR plot parameters  
 CX 20.00 cm  
 FIP 8.001 ppm  
 F1 2401.34 Hz  
 F2P -0.015 ppm  
 F2 -4.64 Hz  
 PPMCM 0.40082 ppm/cm  
 HZCM 120.29896 Hz/cm

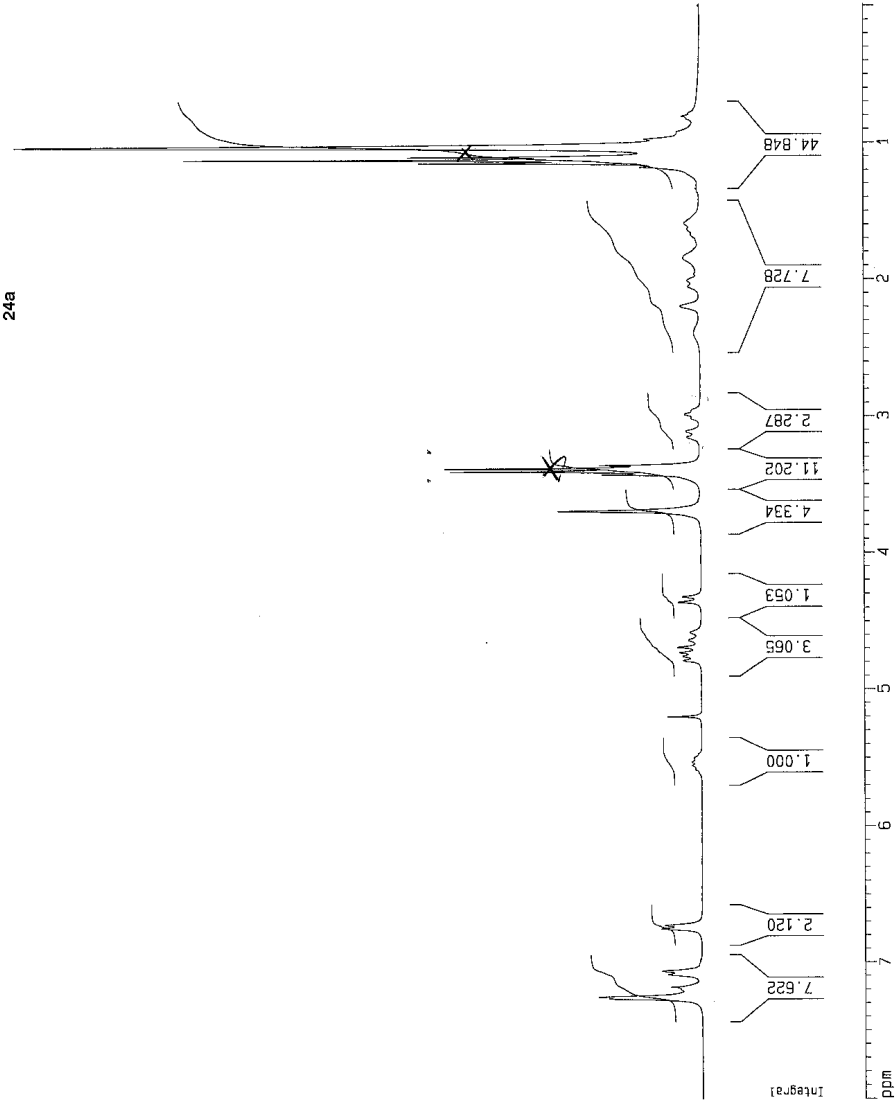

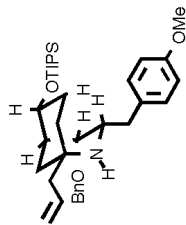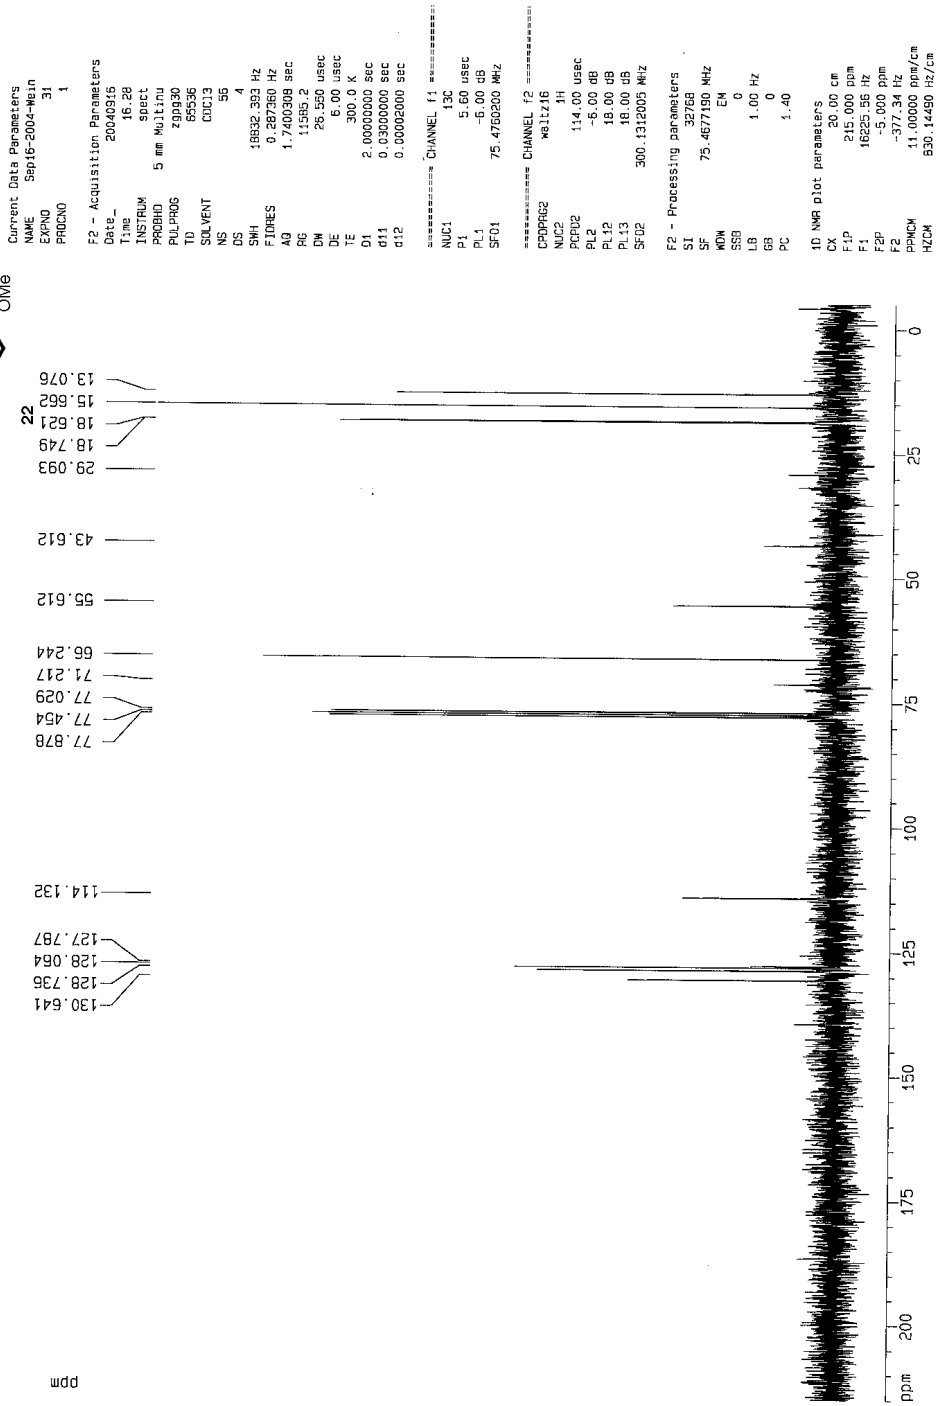

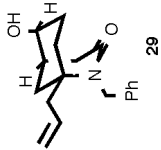

Current Data Parameters  
 NAME Dec07-2001-MeIn  
 EXPNO 10  
 PROCNO 1

F2 - Acquisition Parameters  
 Date\_ 20011207  
 Time 13.26  
 INSTRUM spect  
 PROBHD 5 mm QNP 1H/1  
 PULPROG zg30  
 TO 65536  
 SOLVENT CDCl3  
 NS 16  
 DS 2  
 SWH 6172.839 Hz  
 FIDRES 0.064190 Hz  
 AQ 5.3084660 sec  
 RG 362  
 DM 81.000 usec  
 DE 6.00 usec  
 TE 300.0 K  
 D1 1.0000000 sec

\*\*\*\*\* CHANNEL f1 \*\*\*\*\*  
 NUC1 1H  
 P1 11.70 usec  
 PL1 0.00 dB  
 SF01 299.8718518 MHz

F2 - Processing parameters  
 SI 32768  
 SF 299.8700000 MHz  
 MDK EM  
 SSB 0  
 LB 0.30 Hz  
 GB 0  
 PC 1.00

1D NMR plot parameters  
 CX 20.00 cm  
 F1P 7.844 ppm  
 F1 2352.30 Hz  
 F2P 0.218 ppm  
 F2 65.29 Hz  
 PPMCM 0.38133 ppm/cm  
 HZCM 114.36046 Hz/cm

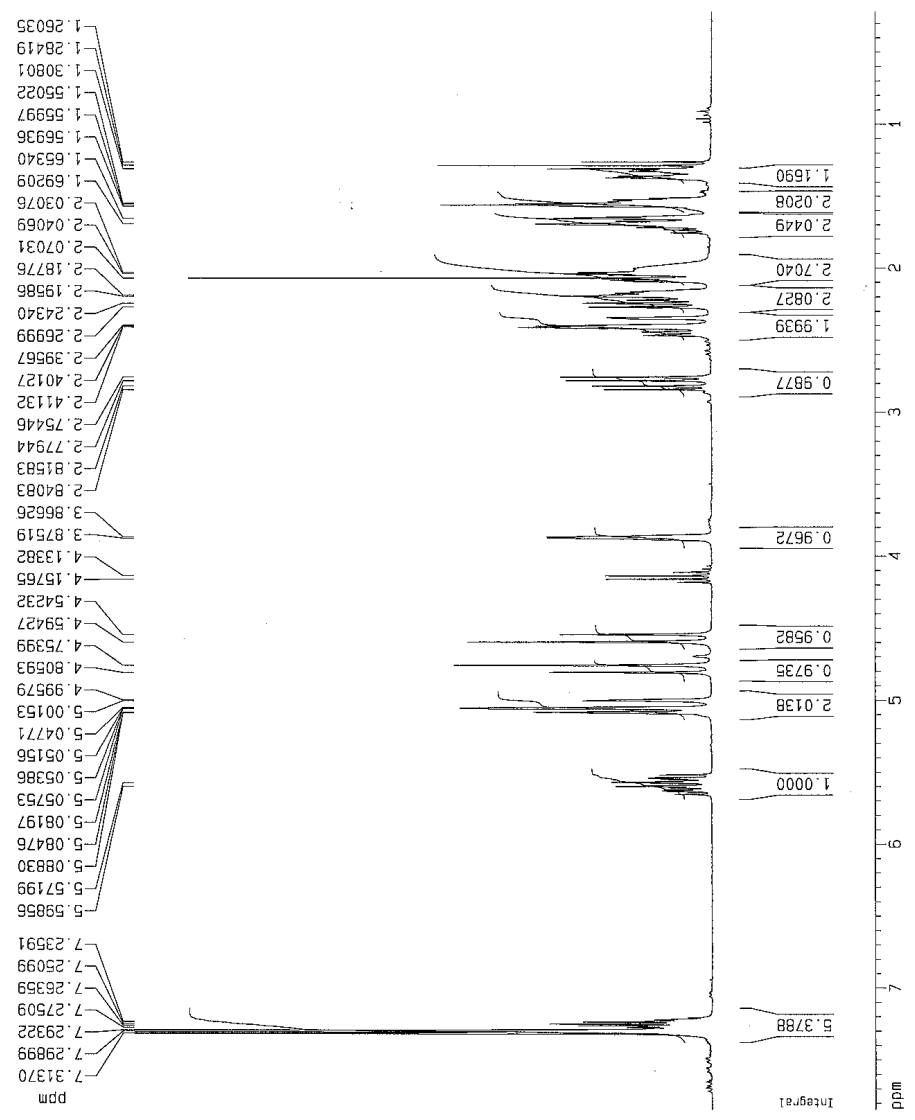

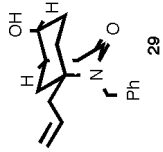

Current Data Parameters  
 NAME NOV28-2001-WBJN  
 EXPNO 30  
 PROCNO 1

F2 - Acquisition Parameters  
 Date\_ 20011128  
 Time 9:28  
 INSTRUM spect  
 PULPROG 5 mm BBI 1H-3  
 TD 259930  
 ID B5536  
 SOLVENT CUC13  
 NS 214  
 DS 4  
 SWH 25125.859 Hz  
 FIDRES 0.383987 Hz  
 AQ 1.3042164 sec  
 RG 8192  
 DW 19.300 usec  
 DE 6.00 usec  
 TE 300.0 K  
 D1 2.00000000 sec  
 d11 0.03000000 sec  
 d12 0.00002000 sec

===== CHANNEL f1 =====  
 NUC1 13C  
 P1 15.60 usec  
 PL1 -6.00 dB  
 SFO1 100.627959 MHz

===== CHANNEL f2 =====  
 CPDPRG2 waltz16  
 NUC2 1H  
 PCPD2 111.00 usec  
 PL2 0.00 dB  
 PL12 24.00 dB  
 PL13 24.00 dB  
 SFO2 400.1315005 MHz

F2 - Processing parameters  
 SI 32758  
 SF 100.6127870 MHz  
 WDW EM  
 SSB 0  
 LB 1.00 Hz  
 GB 0  
 PC 1.40

1D NMR plot parameters  
 CX 20.00 cm  
 F1P 177.323 ppm  
 F1 17840.96 Hz  
 F2P 18.649 ppm  
 F2 1876.34 Hz  
 PPMCM 7.93370 ppm/cm  
 HZCM 799.23120 Hz/cm

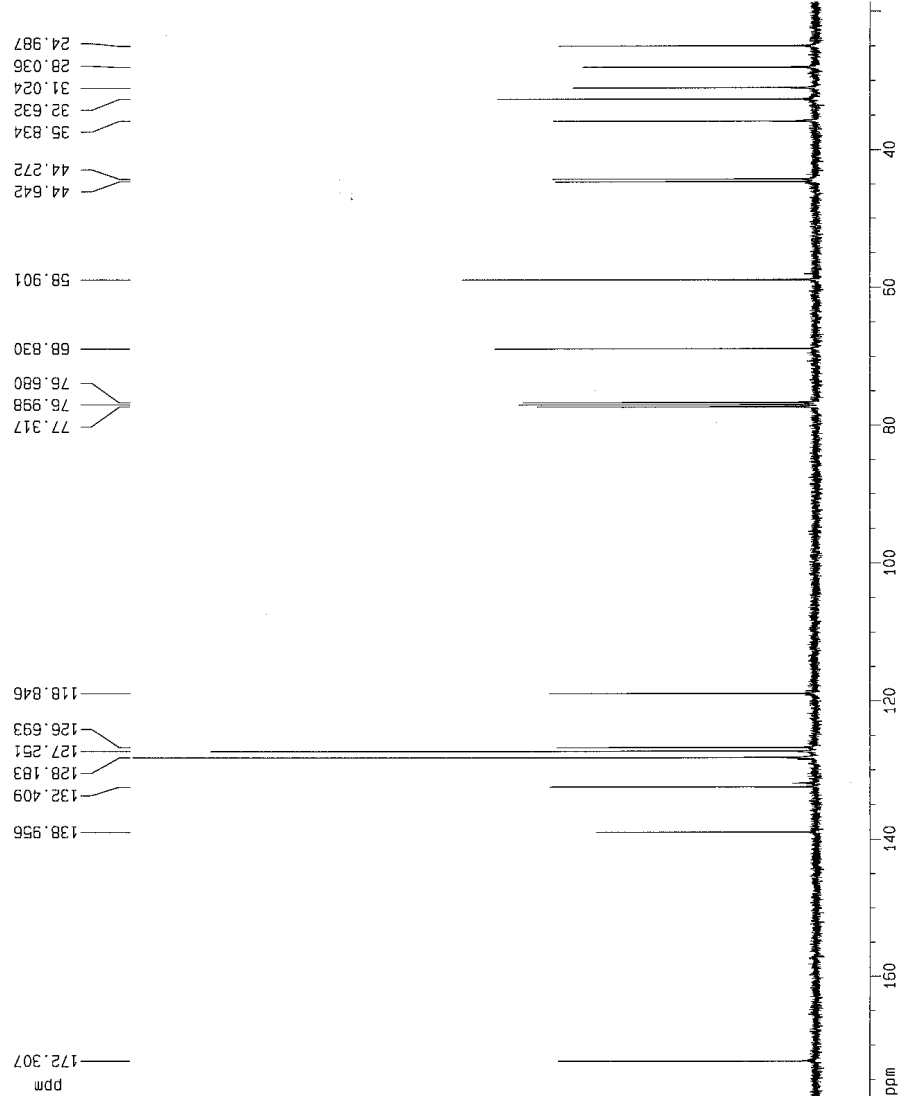

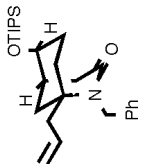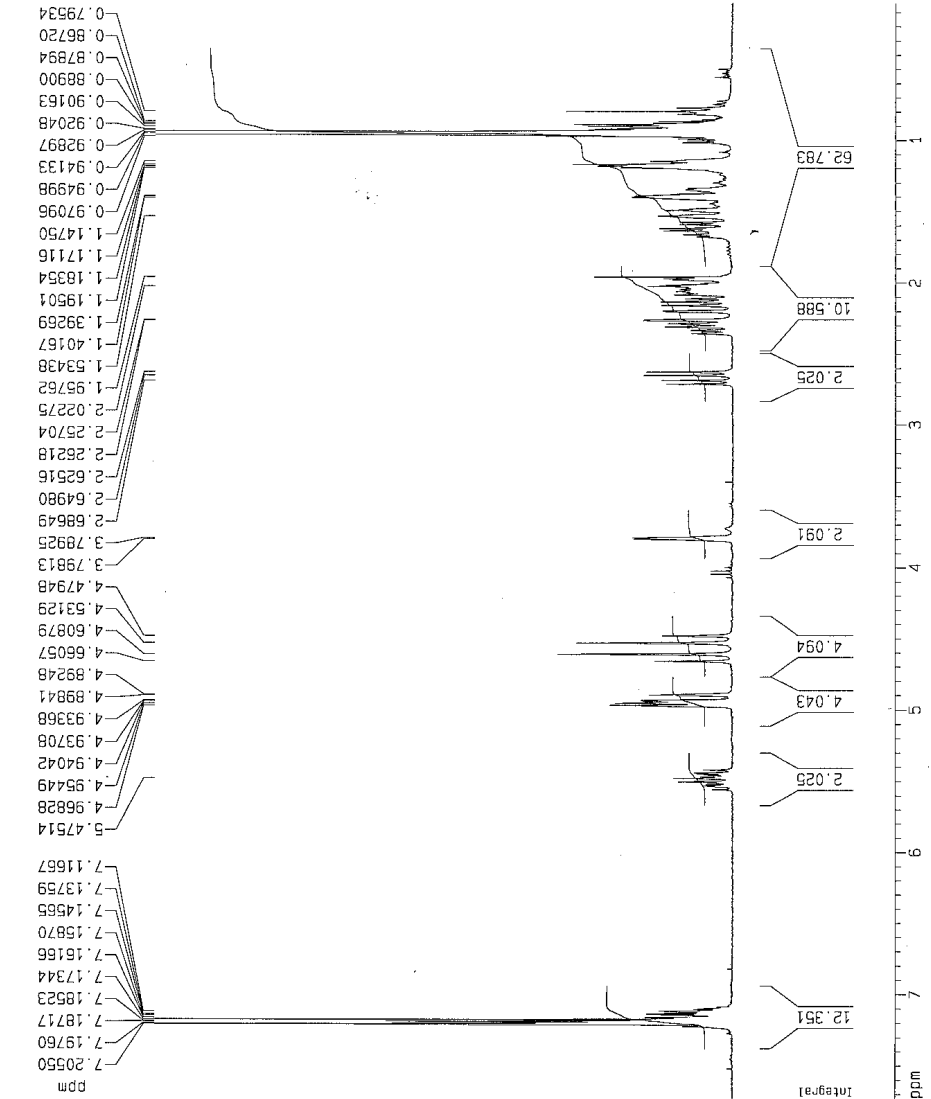

Current Data Parameters  
 NAME Dec12-2001-Wg1n  
 EXPNO 10  
 PROCNO 1

F2 - Acquisition Parameters  
 Date\_ 20011212  
 Time 15.00  
 INSTRUM spect  
 PROBHD 5 mm Multinu  
 PULPROG zg30  
 TO 65536  
 SOLVENT CCl3  
 NS 16  
 DS 2  
 SWH 6172.839 Hz  
 FIDRES 0.094190 Hz  
 AG 5.3084660 sec  
 RG 405.4  
 DW 61.000 usec  
 DE 6.00 usec  
 TE 300.0 K  
 D1 1.0000000 sec

\*\*\*\*\* CHANNEL f1 \*\*\*\*\*  
 NUC1 1H  
 P1 9.00 usec  
 PL1 -6.00 dB  
 SF01 300.1318534 MHz

F2 - Processing parameters  
 SI 32768  
 SF 300.1300321 MHz  
 MDN EM  
 SSB 0  
 LB 0.30 Hz  
 GB 0  
 PC 1.00

1D NMR plot parameters  
 CX 20.00 cm  
 F4P 7.729 ppm  
 F1 2319.80 Hz  
 F2P 0.035 ppm  
 F2 10.48 Hz  
 PPMCM 0.38472 ppm/cm  
 HZCM 115.46584 Hz/cm

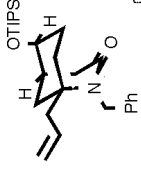

Current Data Parameters  
 NAME Oct11-2001-Ne1  
 EXPNO 20  
 PROCNO 1

F2 - Acquisition Parameters  
 Date\_ 20011011  
 Time 3.25  
 INSTRUM Spect  
 PROBO 5 mm QNP 1H  
 PULPROG zgpg30  
 TD 65536  
 SOLVENT CDCl<sub>3</sub>  
 NS 215  
 DS 4  
 SWH 22727.273 Hz  
 FIDRES 0.346791 Hz  
 AQ 1.4418420 sec  
 RG 32768  
 DW 22.000 usec  
 DE 31.43 usec  
 TE 300.0 K  
 HL1 0 dB  
 CPDPRG waitz16  
 P31 105.00 usec  
 S4 30 dB  
 D11 0.03000000 sec  
 S2 30 dB  
 P1 7.50 usec  
 SFO1 90.5658969 MHz  
 NUCLEUS 13C

F2 - Processing parameters  
 SI 32768  
 SF 90.5657773 MHz  
 WDW no  
 SSB 0  
 LB 0.00 Hz  
 GB 0  
 PC 1.40

ID NMR plot parameters  
 CX 20.00 cm  
 F1P 150.000 ppm  
 F1 17205.60 Hz  
 F2P 0.000 ppm  
 F2 0.00 Hz  
 PPRCM 9.50000 ppm/cm  
 HZCM 860.27991 Hz/cm

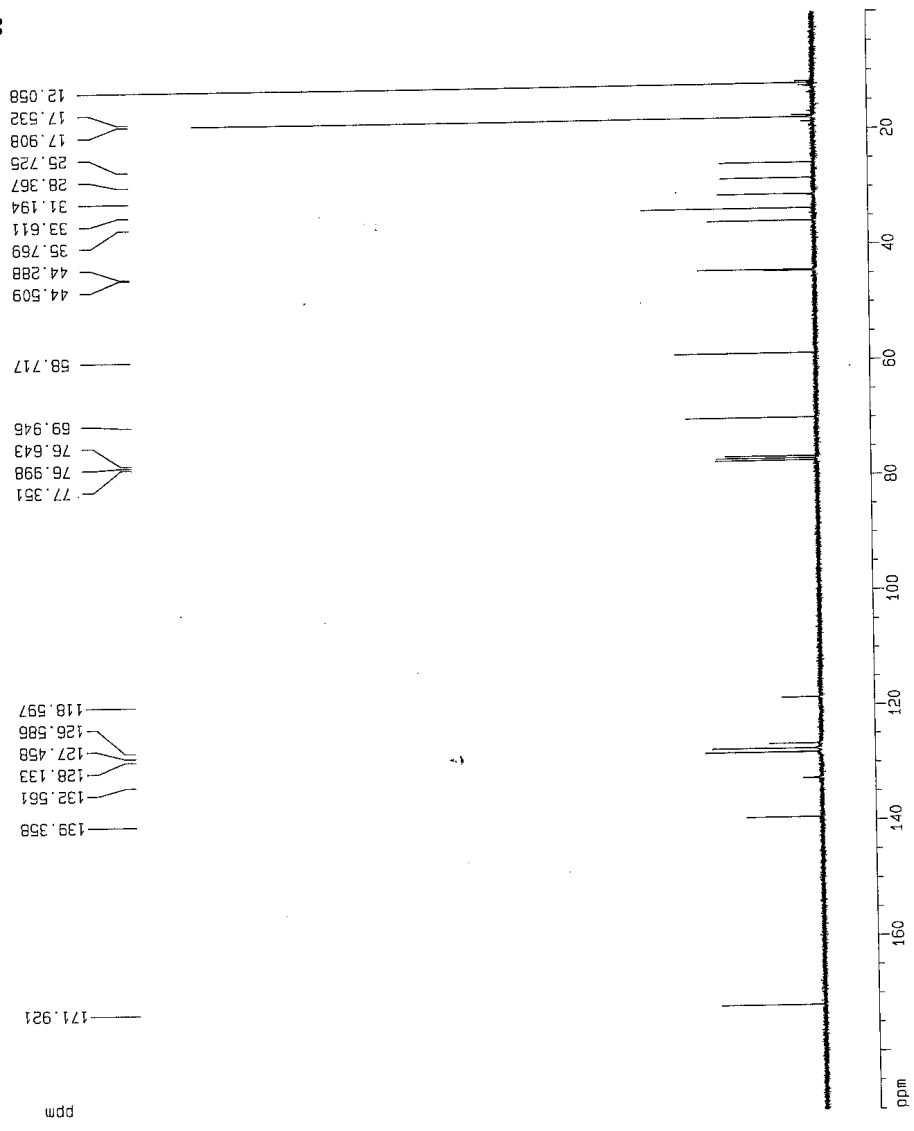

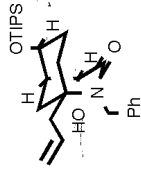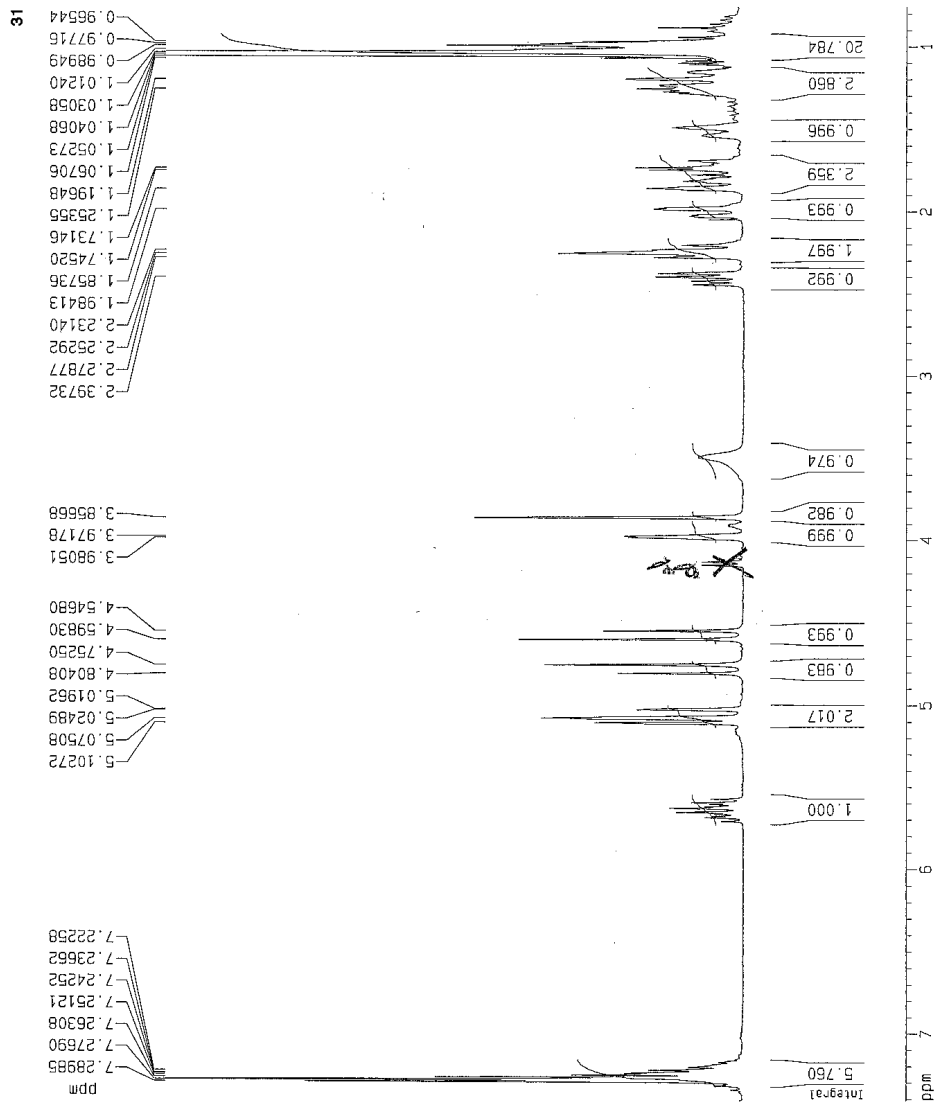

Current Data Parameters  
 NAME Mar29-2002-Wein  
 EXPNO 10  
 PROCNO 1

F2 - Acquisition Parameters  
 Date\_ 20020329  
 Time 15:01  
 INSTRUM spect  
 PROBRD 5 mm Nu-Itin  
 PULPROG zg30  
 TO 65536  
 SOLVENT CDCl3  
 NS 16  
 DS 2  
 SWH 6172.839 Hz  
 FIDRES 0.094190 Hz  
 AQ 5.3084660 sec  
 RG 256  
 DW 81.000 usec  
 DE 6.00 usec  
 TE 300.0 K  
 D1 1.0000000 sec

===== CHANNEL f1 =====  
 NUC1 1H  
 P1 9.80 usec  
 PL1 -6.00 dB  
 SF01 300.1318534 MHz

F2 - Processing parameters  
 SI 32768  
 SF 300.1300052 MHz  
 MDW EM  
 SSB 0  
 LB 0.30 Hz  
 GB 0  
 PC 1.00

1D NMR plot parameters  
 CX 20.00 cm  
 F1P 7.410 ppm  
 F1 2223.89 Hz  
 F2P 0.755 ppm  
 F2 226.48 Hz  
 PPMCM 0.33276 ppm/cm  
 HZCM 95.87049 Hz/cm

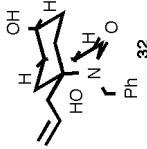

Current Data Parameters  
 NAME Apr30-2002-Wein  
 EXPNO 10  
 PROCNO 1

F2 - Acquisition Parameters  
 Date\_ 20020430  
 Time 14.46  
 INSTRUM spect  
 PROBRD 5 mm BBI 1H-B  
 PULPROG zg30  
 TD 65536  
 SOLVENT CDCl3  
 NS 16  
 DS 2  
 SWH 6278.146 Hz  
 FIDRES 0.126314 Hz  
 AQ 3.9564243 sec  
 RG 90.5  
 DM 60.400 usec  
 DE 6.00 usec  
 TE 300.0 K  
 D1 1.00000000 sec

===== CHANNEL f1 =====  
 NUC1 1H  
 P1 6.28 usec  
 PL1 0.00 dB  
 SFO1 400.1324710 MHz

F2 - Processing parameters  
 SI 32768  
 SF 400.1300076 MHz  
 WDW EN  
 SSB 0  
 LB 0.30 Hz  
 GB 0  
 PC 1.00

1D NMR plot parameters  
 CX 20.00 cm  
 F1P 7.408 ppm  
 F1 2954.27 Hz  
 F2P 1.076 ppm  
 F2 430.66 Hz  
 PPMCM 0.31660 ppm/cm  
 HZCM 126.68047 Hz/cm

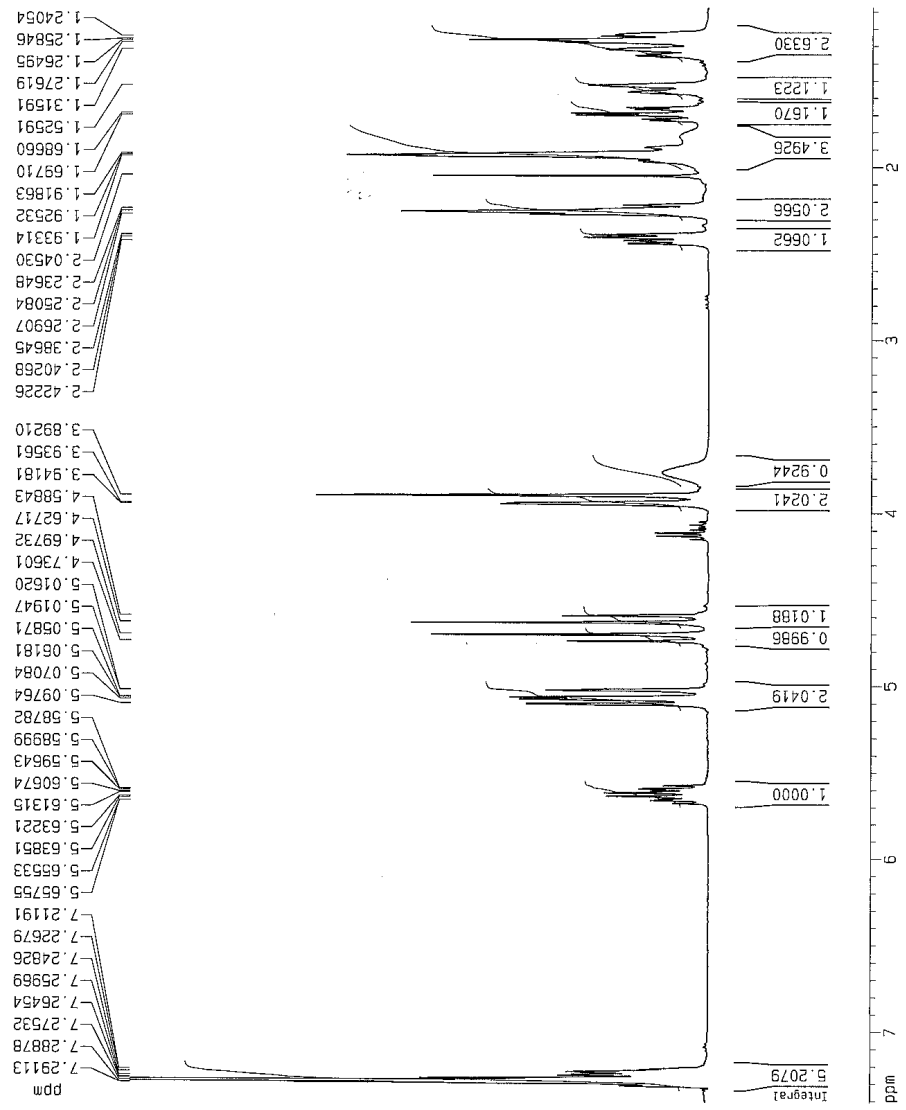



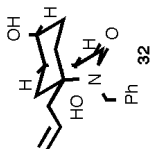

Current Data Parameters  
 NAME Apr30-2002-Main  
 EXPNO 11  
 PROCNO 1

F2 - Acquisition Parameters  
 Date\_ 20020430  
 Time 15.01  
 INSTRUM spect  
 PROBHD 5 mm BBI 1H-8  
 PULPROG zgpg30  
 TD 65536  
 SOLVENT CDCl3  
 NS 308  
 DS 4  
 SWH 25125.625 Hz  
 FIDRES 0.383387 Hz  
 AQ 1.3042164 sec  
 RG 8192  
 DN 19.500 USEC  
 DE 6.00 USEC  
 TE 300.0 K  
 D1 2.00000000 sec  
 d11 0.03000000 sec  
 d12 0.00020000 sec

===== CHANNEL f1 =====  
 NUC1 13C  
 P1 16.15 USEC  
 PL1 -6.00 dB  
 SFO1 100.6237959 MHz

===== CHANNEL f2 =====  
 CPDPRG2 waltz16  
 NUC2 1H  
 PCPD2 113.00 USEC  
 PL2 0.00 dB  
 PL12 24.00 dB  
 PL13 24.00 dB  
 SFO2 400.1315005 MHz

F2 - Processing parameters  
 SI 32758  
 SF 100.612717 MHz  
 WOK EM  
 SSB 0  
 LB 1.00 Hz  
 GB 0  
 PC 1.40

1D NMR plot parameters  
 CX 20.00 cm  
 F1p 177.157 ppm  
 F1 17828.28 Hz  
 F2p 20.250 ppm  
 F2 2037.42 Hz  
 PRMCM 7.84734 ppm/cm  
 HZCM 789.54279 Hz/cm

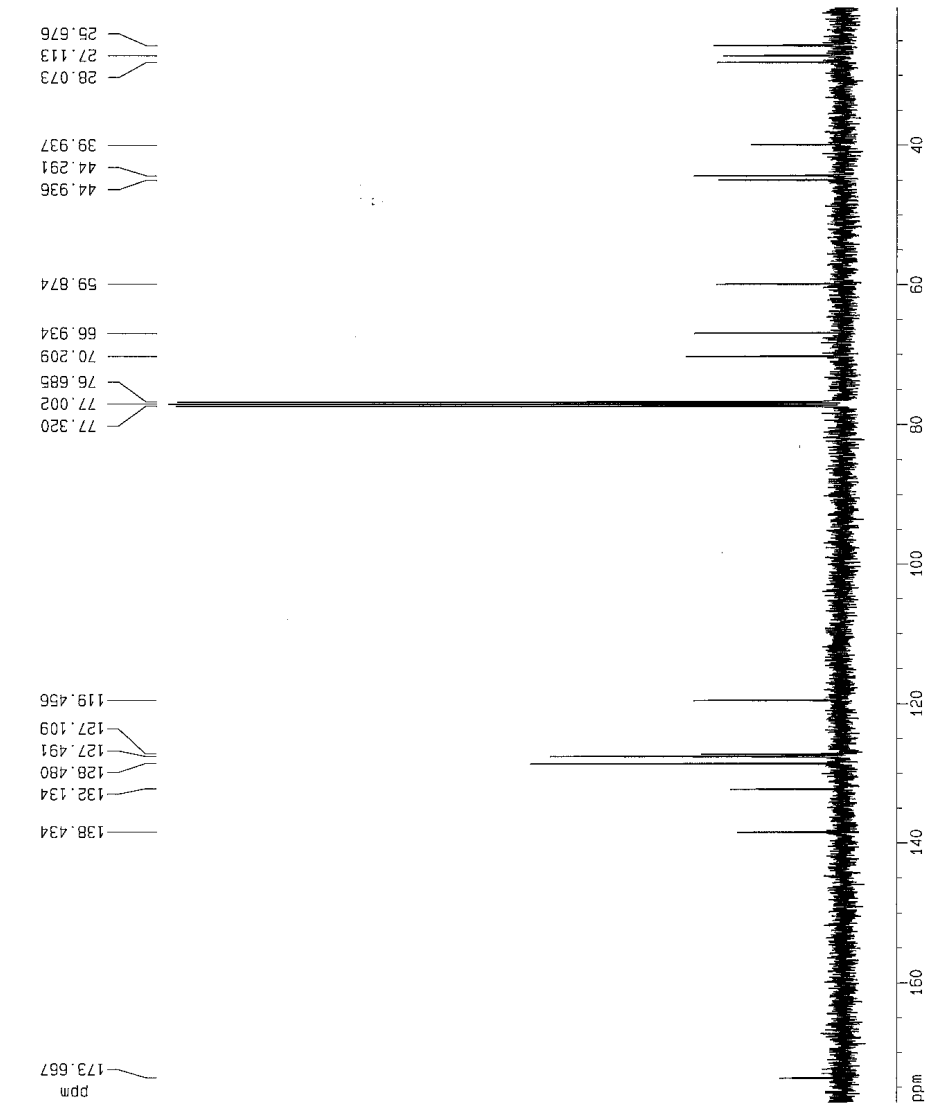

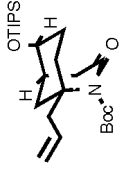

33

Current Data Parameters  
 NAME Dec12-2001-Mein  
 EXPNO 20  
 PROCNO 1

F2 - Acquisition Parameters  
 Date\_ 20011212  
 Time 15:11  
 INSTRUM spect  
 PROBHD 5 mm Multinu  
 PULPROG zg30  
 TO 65536  
 SOLVENT CDCl3  
 NS 16  
 DS 2  
 SWH 6172.839 Hz  
 FIDRES 0.094130 Hz  
 AQ 5.3084690 sec  
 RG 456.1  
 DW 81.000 usec  
 DE 6.00 usec  
 TE 300.0 K  
 D1 1.00000000 sec

===== CHANNEL f1 =====  
 NUC1 <sup>1</sup>H  
 P1 9.80 usec  
 PL1 -5.00 dB  
 SF01 300.1318534 MHz

F2 - Processing parameters  
 SI 32768  
 SF 300.1300357 MHz  
 MDM EM  
 SSB 0  
 LB 0.30 Hz  
 GB 0  
 PC 1.00

1D NMR plot parameters  
 CX 20.00 cm  
 F1P 7.766 ppm  
 F2P -0.148 ppm  
 F2 -44.39 Hz  
 PRGM 0.99571 ppm/cm  
 HZCM 118.76586 Hz/cm

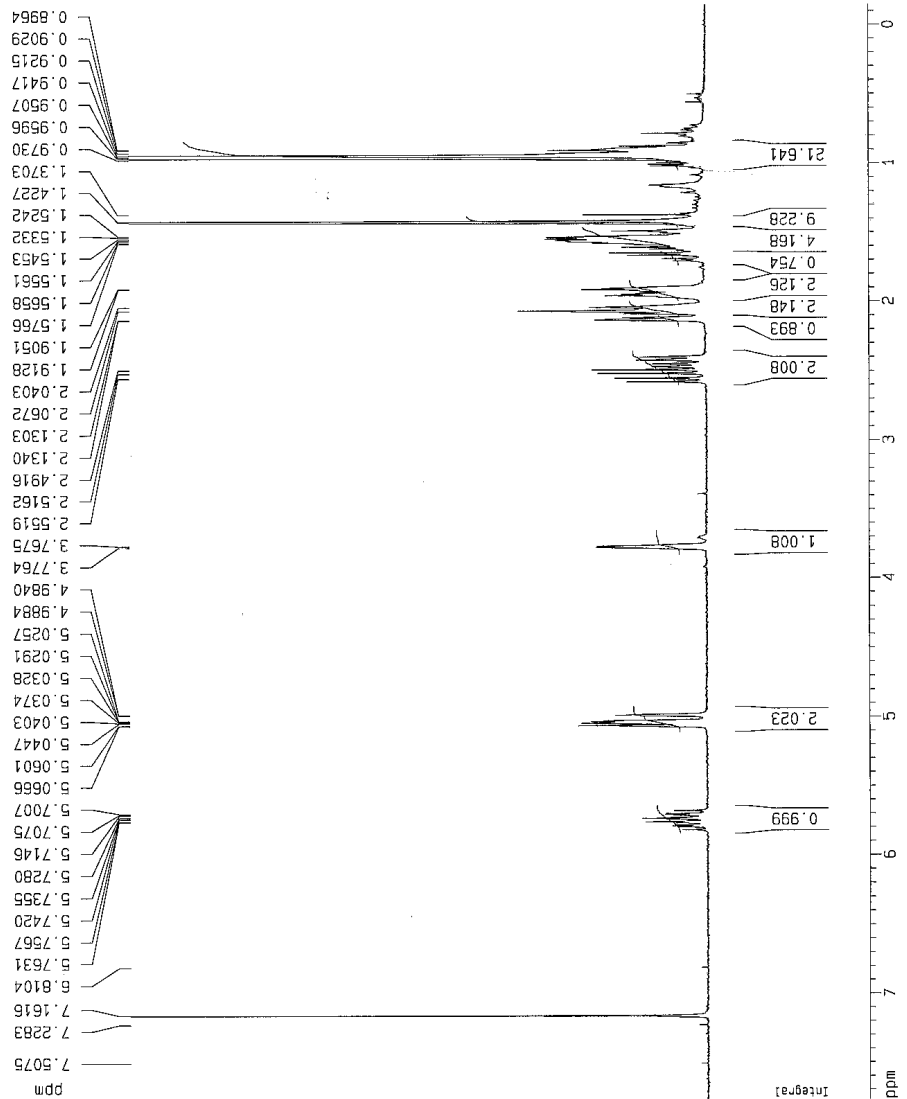

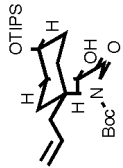

94

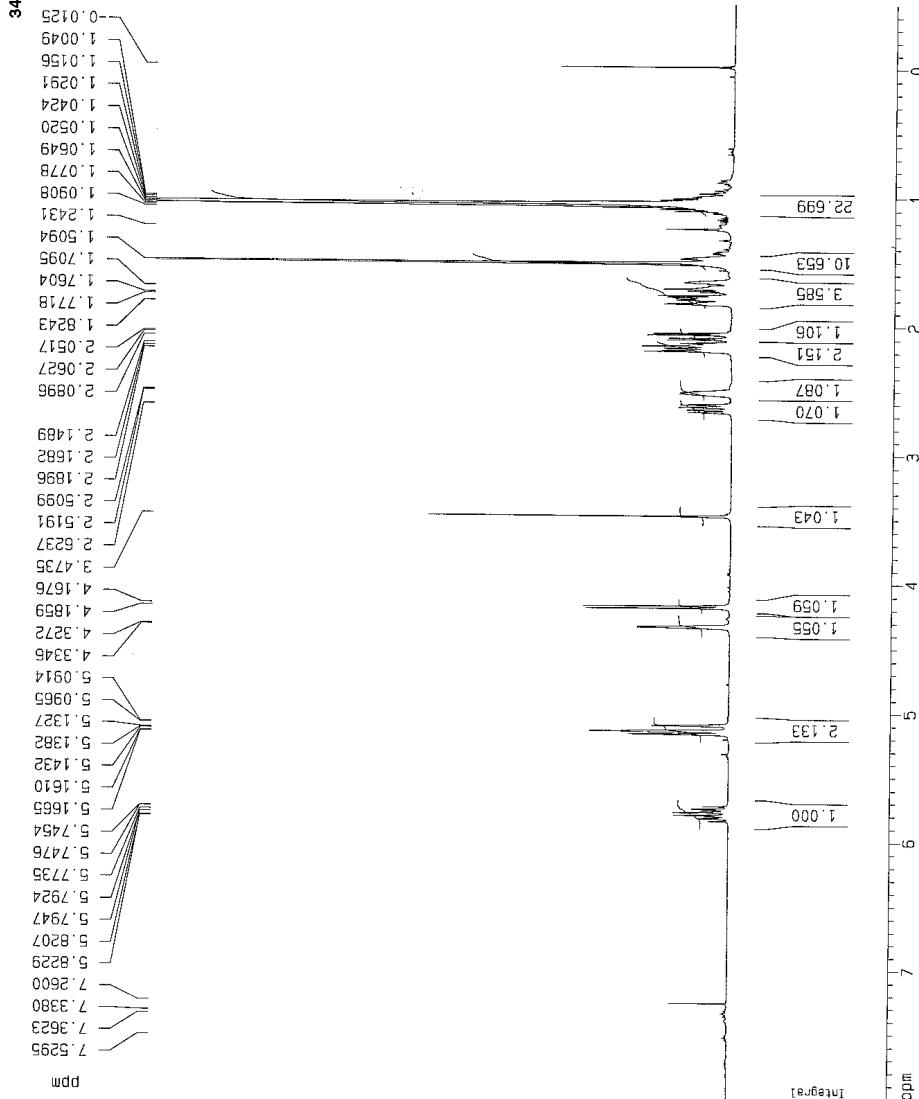

Current Data Parameters  
 NAME Oct23-2001-Me1  
 EXPNO 10  
 PROCNO 1

F2 - Acquisition Parameters  
 Date\_ 20011022  
 Time 22:36  
 INSTRUM spect  
 PROBD 5 mm QNP 1H  
 PULPROG zg30  
 TD 65536  
 SOLVENT CDCl3  
 NS 16  
 DS 2  
 SWH 7462.657 Hz  
 FIDRES 0.113672 Hz  
 AQ 4.3909621 sec  
 RG 128  
 DW 67.000 usec  
 DE 95.71 usec  
 TE 300.0 K  
 HL1 0 dB  
 P1 1.0000000 sec  
 P1 12.00 usec  
 SF01 360.1361620 MHz  
 NUCLEUS 1H

F2 - Processing parameters  
 SI 32768  
 SF 360.1359540 MHz  
 MDW no  
 SSB 0  
 LB 0.00 Hz  
 GB 0  
 PC 1.00

1D NMR plot parameters  
 CX 20.00 cm  
 F1P 5.000 ppm  
 F1 2881.07 Hz  
 F2P -0.500 ppm  
 F2 -180.07 Hz  
 PPMCM 0.482500 ppm/cm  
 HZCM 153.06695 Hz/cm

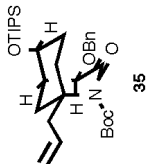

Current Data Parameters  
 NAME Feb04-2002-Wein  
 EXPNO 30  
 PROCNO 1

F2 - Acquisition Parameters  
 Date\_ 20020204  
 Time 9.18  
 INSTRUM spect  
 PROBHD 5 mm Multinu  
 PULPROG zg30  
 TD 65536  
 SOLVENT CDCl3  
 NS 16  
 DS 2  
 SWH 6172.839 Hz  
 FIDRES 0.094190 Hz  
 AQ 5.3024660 sec  
 RG 181  
 DM B1.000 usec  
 DE 6.00 usec  
 TE 300.0 K  
 D1 1.00000000 sec

===== CHANNEL f1 =====  
 NUC1 1H  
 P1 9.80 usec  
 PL1 -6.00 dB  
 SF01 300.1318534 MHz

F2 - Processing parameters  
 SI 32768  
 SF 300.1300277 MHz  
 NDM FM  
 SSB 0  
 LB 0.30 Hz  
 GB 0  
 PC 1.00

1D NMR plot parameters  
 CX 20.00 cm  
 FIP 7.583 ppm  
 F1 2275.81 Hz  
 F2 0.298 ppm  
 F3 69.69 Hz  
 PPMCM 0.36421 ppm/cm  
 HZCM 109.31071 Hz/cm

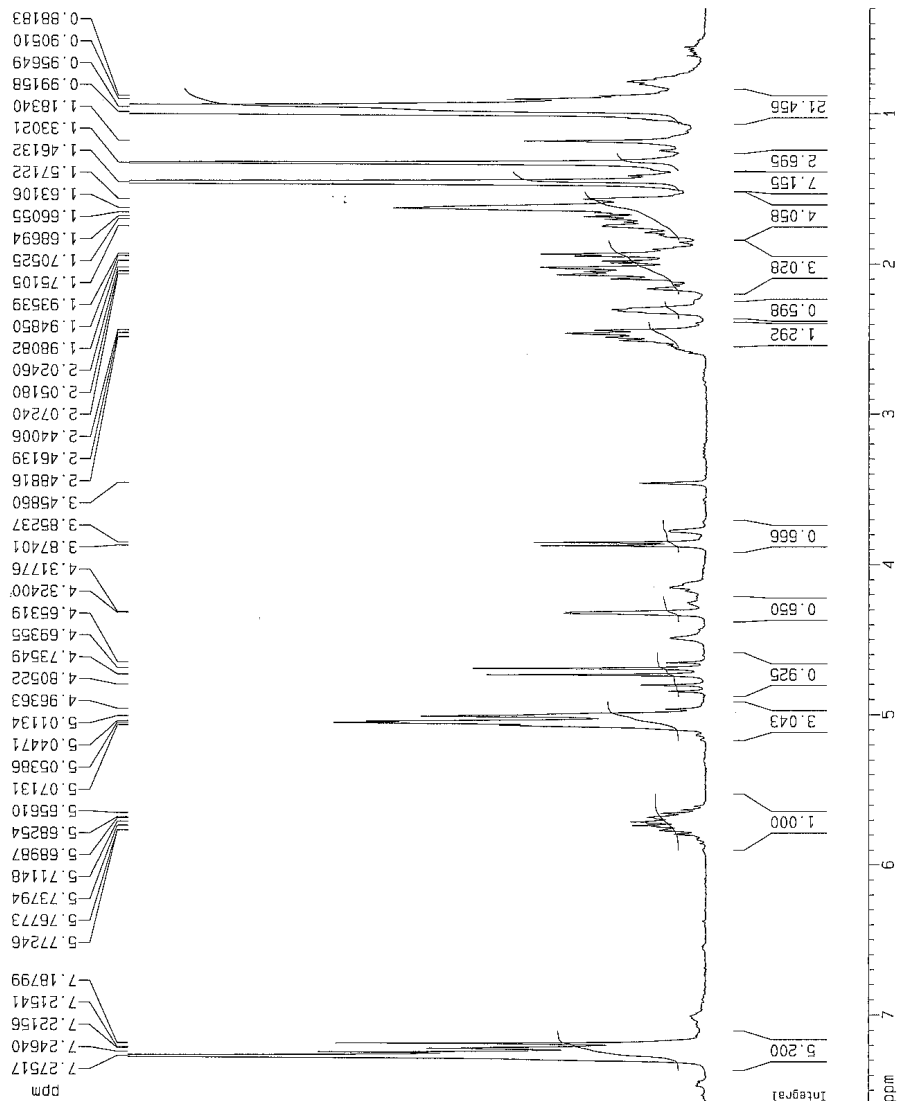

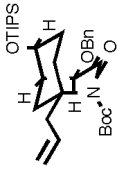

35

Current Data Parameters

NAME Nov17-2001-161  
EXPNO 30  
PROCNO 1

F2 - Acquisition Parameters

Date\_ 20011116  
Time 23.41  
INSTRUM spect  
PROBHD 5 mm QNP 1H  
PULPROG zgpg30  
TD 65536  
SOLVENT CUC13  
NS 344  
DS 4  
SWH 22727.273 Hz  
FIDRES 0.346791 Hz  
AQ 1.4418420 sec  
RG 32768  
DM 22.000 usec  
DE 31.43 usec  
TE 300.0 K  
HL1 0 dB  
D1 2.0000000 sec  
CPDPRG waltz16  
P31 106.00 usec  
S4 30 dB  
D11 0.0300000 sec  
S2 30 dB  
P1 7.90 usec  
SFO1 90.5659669 MHz  
NUCLEUS 13C

F2 - Processing parameters

SI 32768  
SF 90.5557628 MHz  
WDW EM  
SSB 0  
LB 1.00 Hz  
GB 0  
PC 1.40  
ID NMR plot parameters  
CX 20.00 cm  
F1P 160.000 ppm  
F1 16300.04 Hz  
F2P 0.000 ppm  
F2 0.00 Hz  
PPMCM 9.00000 ppm/cm  
HZCM 815.00189 Hz/cm

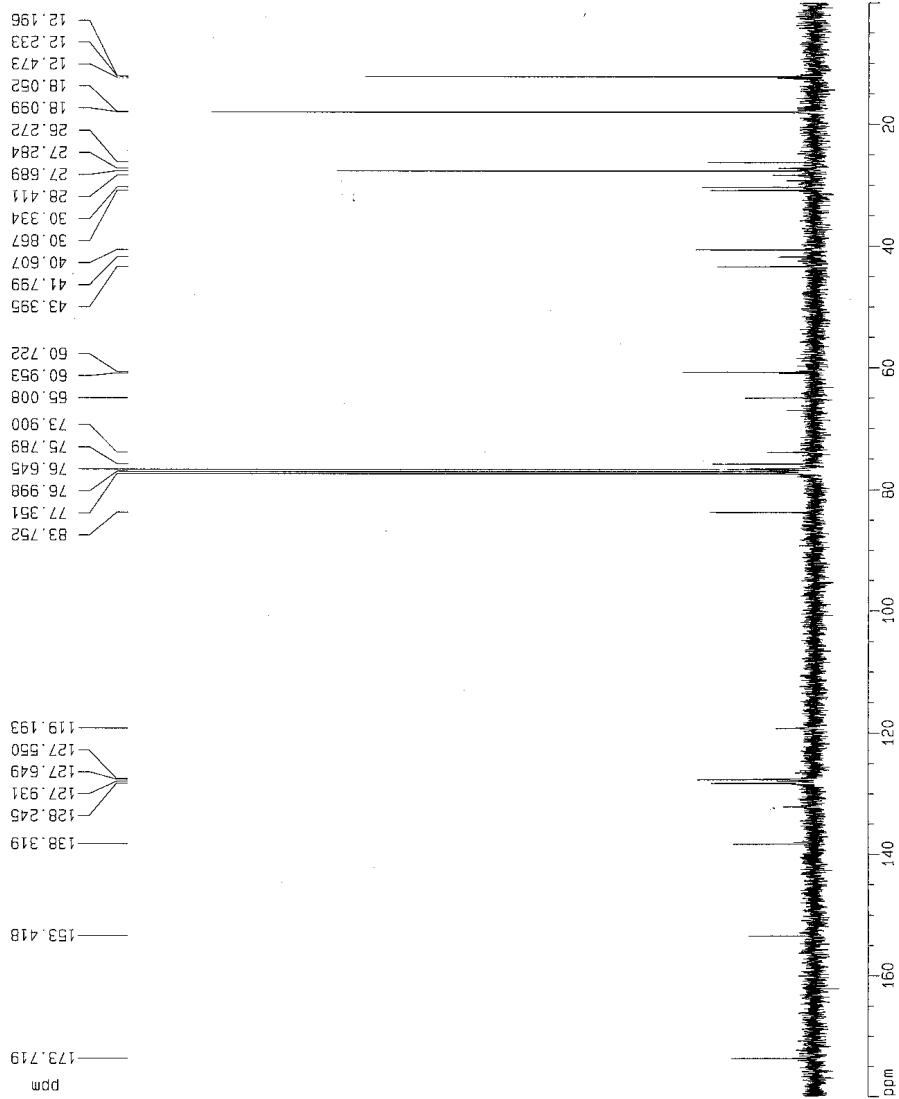

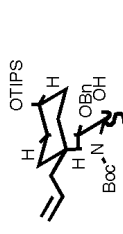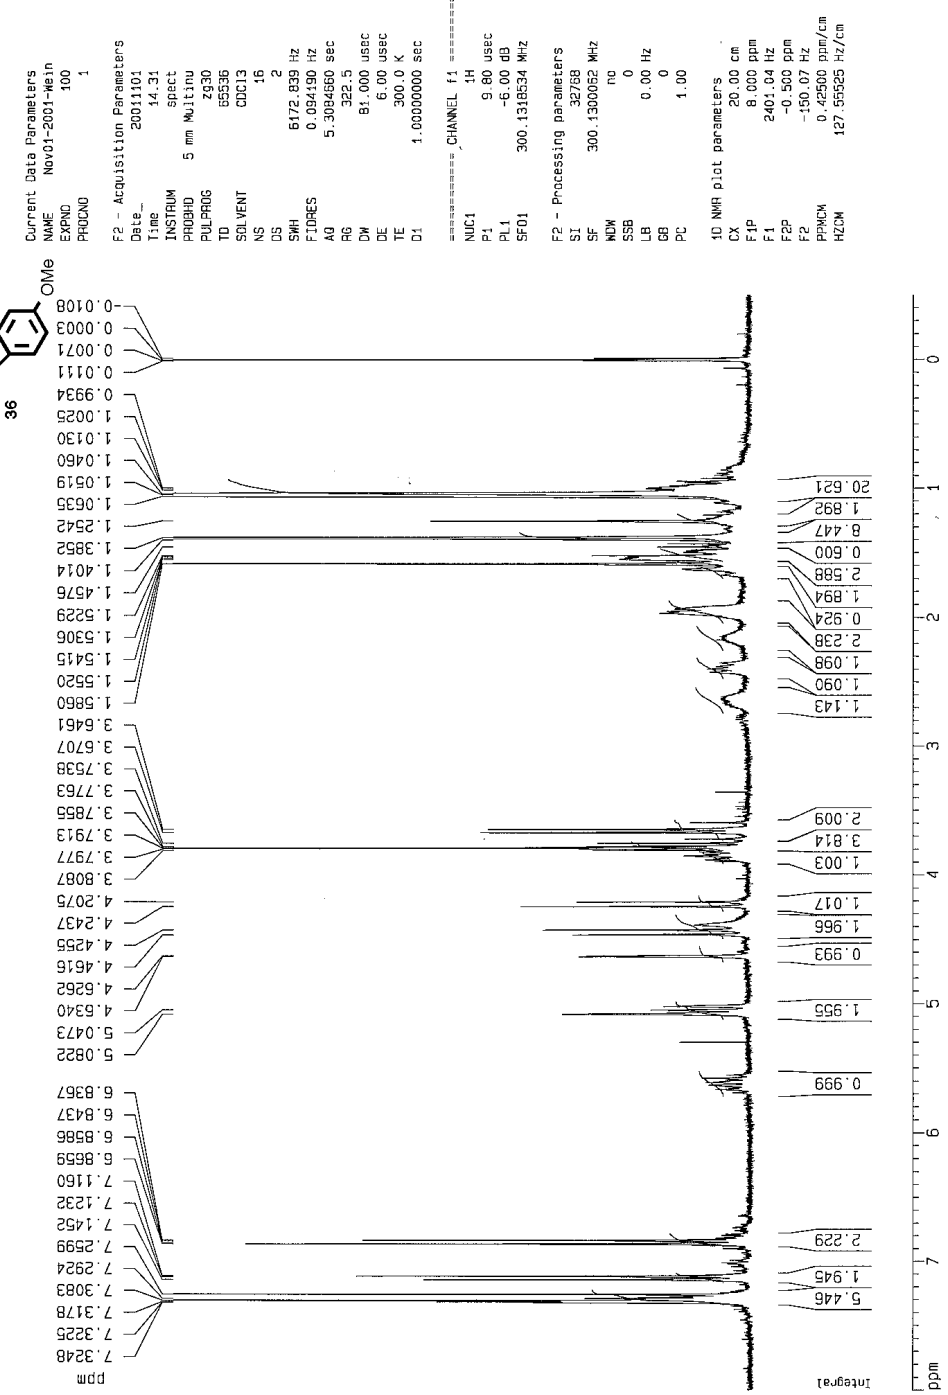

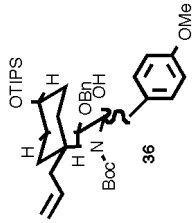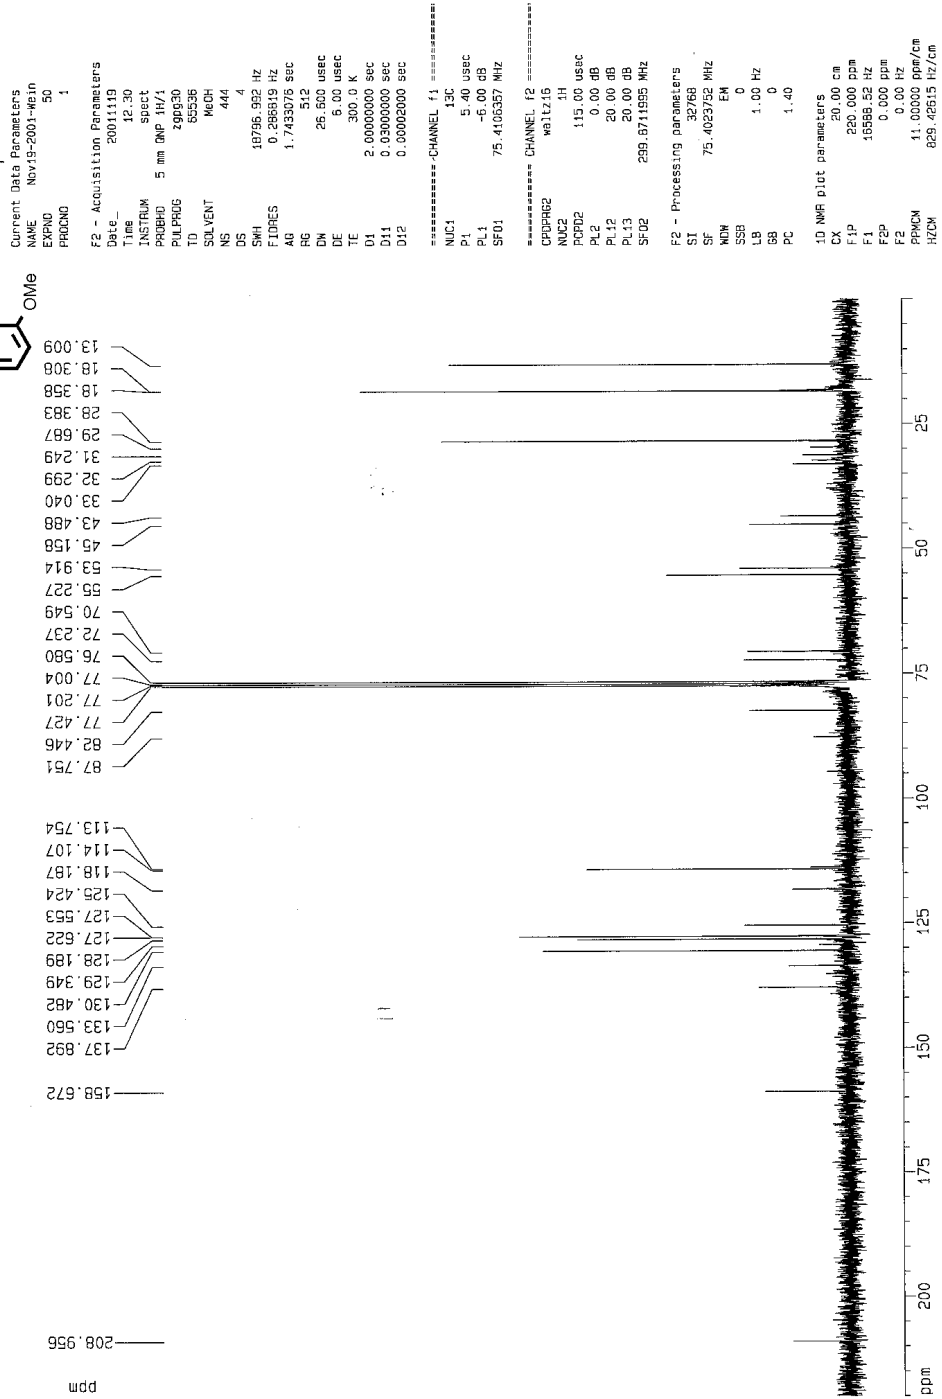

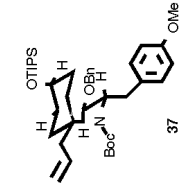

Current Data Parameters  
 NAME Nov27-2001-wein  
 EXPNO 20  
 PROCNO 1

F2 - Acquisition Parameters  
 Date\_ 20011127  
 Time 20.15  
 INSTRUM spect  
 PROBHD 5 mm GNP 1H/1  
 PULPROG zg30  
 TD 65536  
 SOLVENT CDCl3  
 NS 16  
 DS 2  
 SWH 6472.839 Hz  
 FIDRES 0.094180 Hz  
 AQ 5.3084660 sec  
 RG 322.5  
 DN 81.000 usec  
 DE 6.00 usec  
 TE 300.0 K  
 D1 1.00000000 sec

===== CHANNEL f1 =====  
 NUC1 1H  
 P1 11.70 usec  
 PL1 0.00 dB  
 SF01 299.9718516 MHz

F2 - Processing parameters  
 SI 32768  
 SF 299.8700099 MHz  
 MDW nc  
 SSB 0  
 LB 0.00 Hz  
 GB 0  
 PC 1.00

1D NMR plot parameters  
 CX 20.00 cm  
 F1P 8.000 ppm  
 F1 2398.36 Hz  
 F2P -0.500 ppm  
 F2 -149.93 Hz  
 PRMCM 0.42500 ppm/cm  
 HZCM 127.44475 Hz/cm

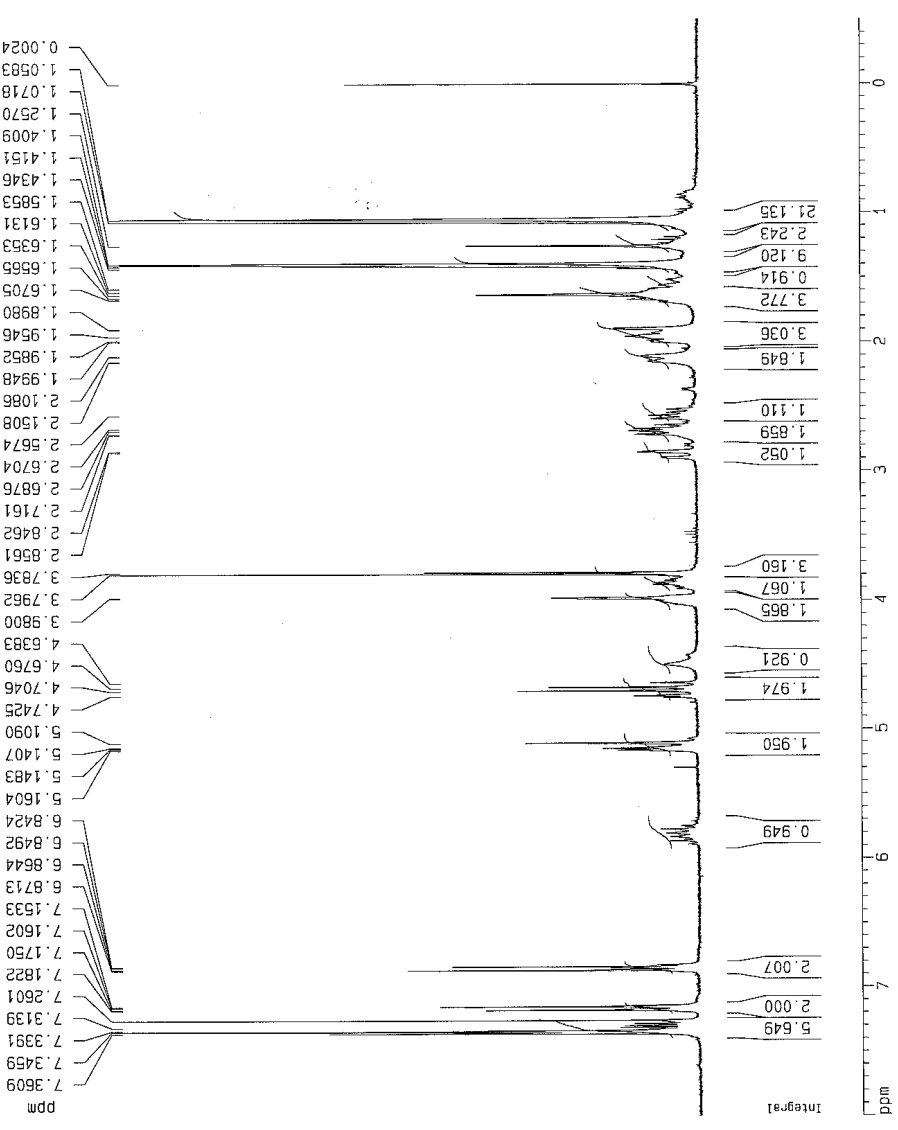



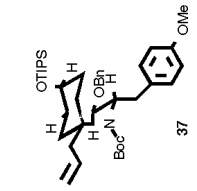

Current Data Parameters  
 NAME Nov27-2001-Hein  
 EXPNO 31  
 PROCNO 1

F2 - Acquisition Parameters  
 Date\_ 20011128  
 Time 7.57  
 INSTRUM spect  
 PROBHD 5 mm QNP 1H/1  
 PULPROG zgpg30  
 TD 65536  
 SOLVENT CDCl3  
 NS 800  
 DS 4  
 SWH 18795.992 HZ  
 FIDRES 0.286819 HZ  
 AQ 1.7433076 sec  
 RG 8192  
 DW 26.600 usec  
 DE 6.00 usec  
 TE 300.0 K  
 D1 2.00000000 sec  
 D11 0.03000000 sec  
 D12 0.00020000 sec

===== CHANNEL f1 =====  
 NUC1 13C  
 P1 5.40 usec  
 PL1 -6.00 dB  
 SF01 75.4106357 MHz

===== CHANNEL f2 =====  
 CPDPRG2 waltz16  
 NUC2 1H  
 P2 115.00 usec  
 PL2 0.00 dB  
 PL12 20.00 dB  
 PL13 20.00 dB  
 SF02 299.8711595 MHz

F2 - Processing parameters  
 SI 32768  
 SF 75.4023410 MHz  
 KW 6  
 SSB 0  
 LB 0  
 GB 0  
 PC 1.40

1D NMR plot parameters  
 CX 20.00 cm  
 F1P 165.000 ppm  
 F1 12441.38 Hz  
 F2P 0.000 ppm  
 F2 0.00 Hz  
 PRGM 8.25000 ppm/cm  
 HZCM 622.06934 Hz/cm

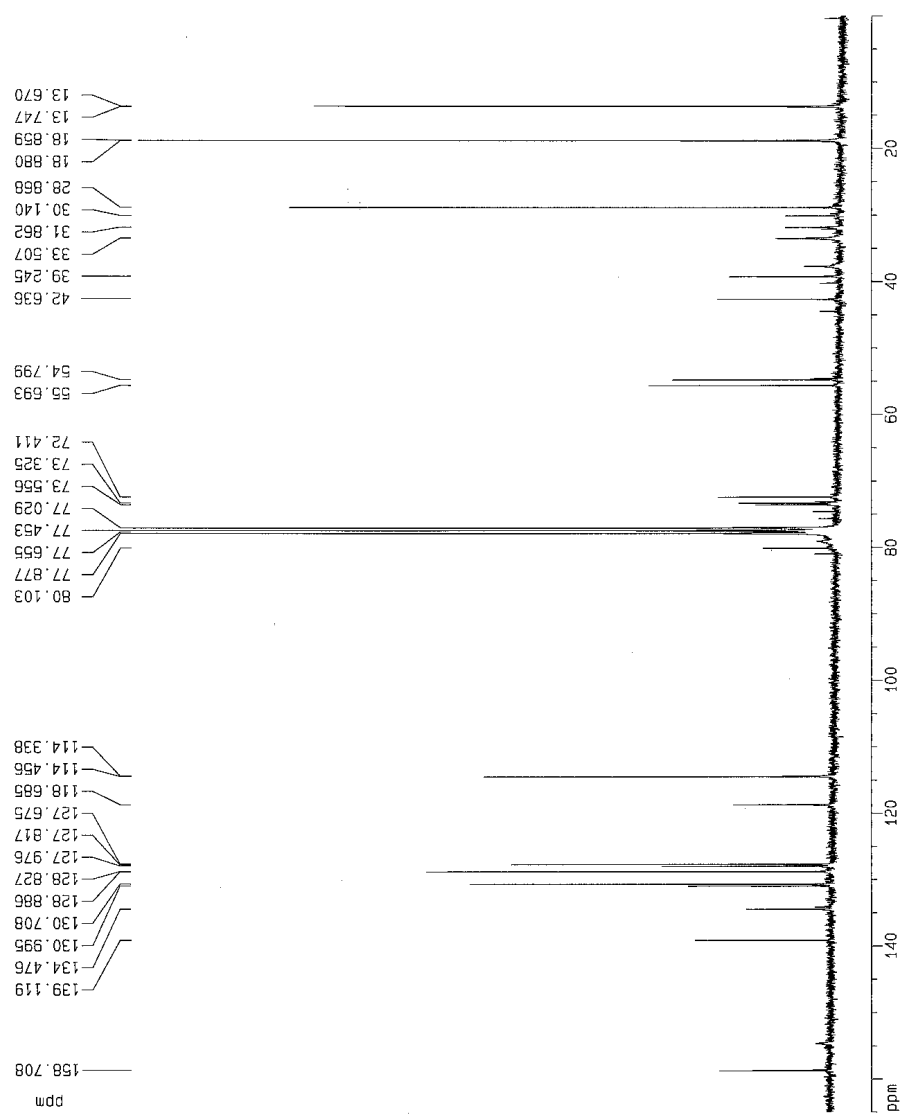

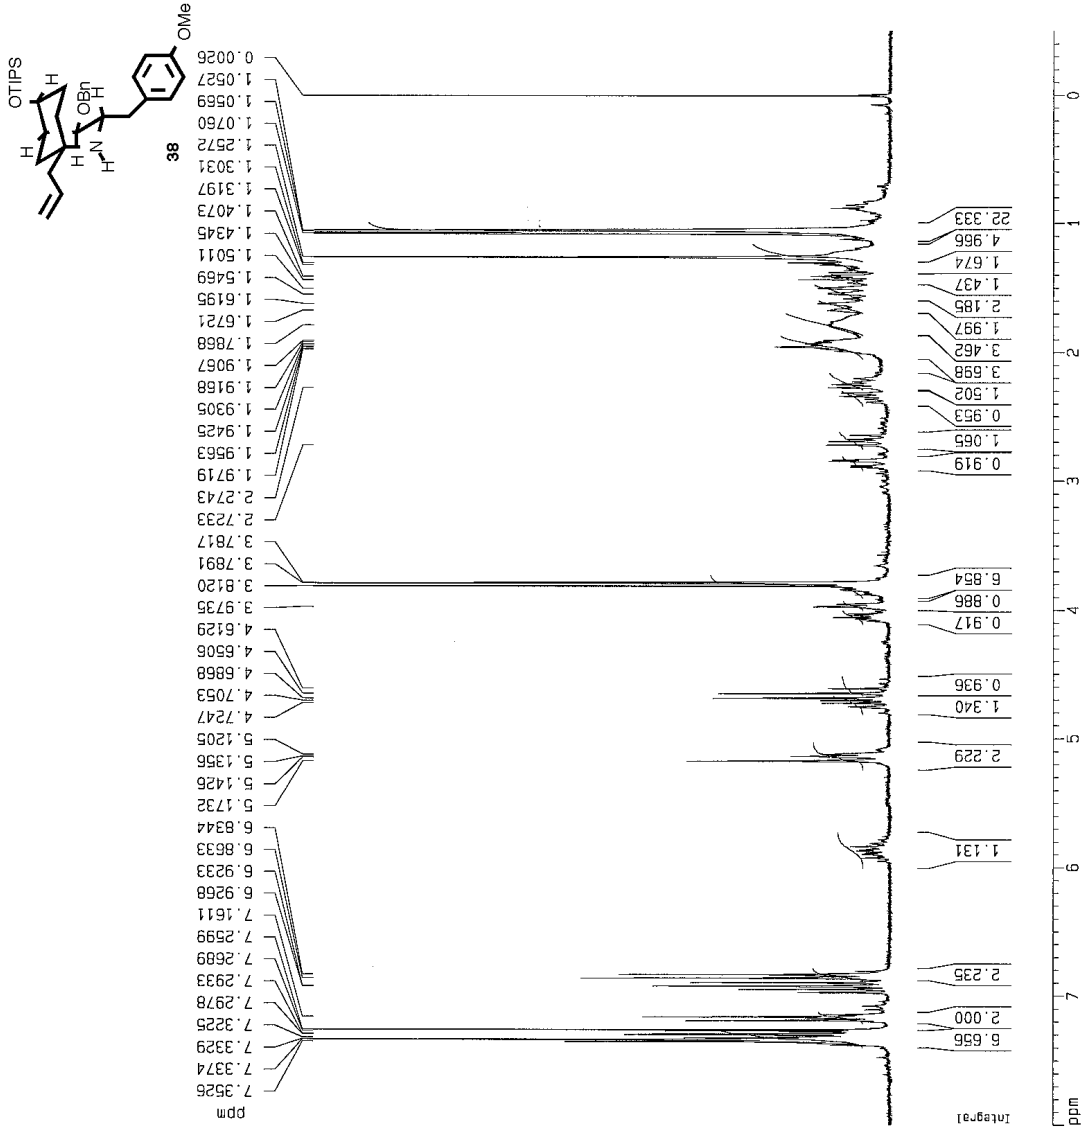

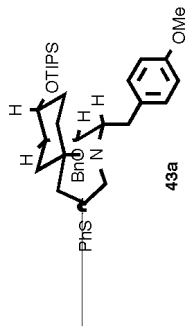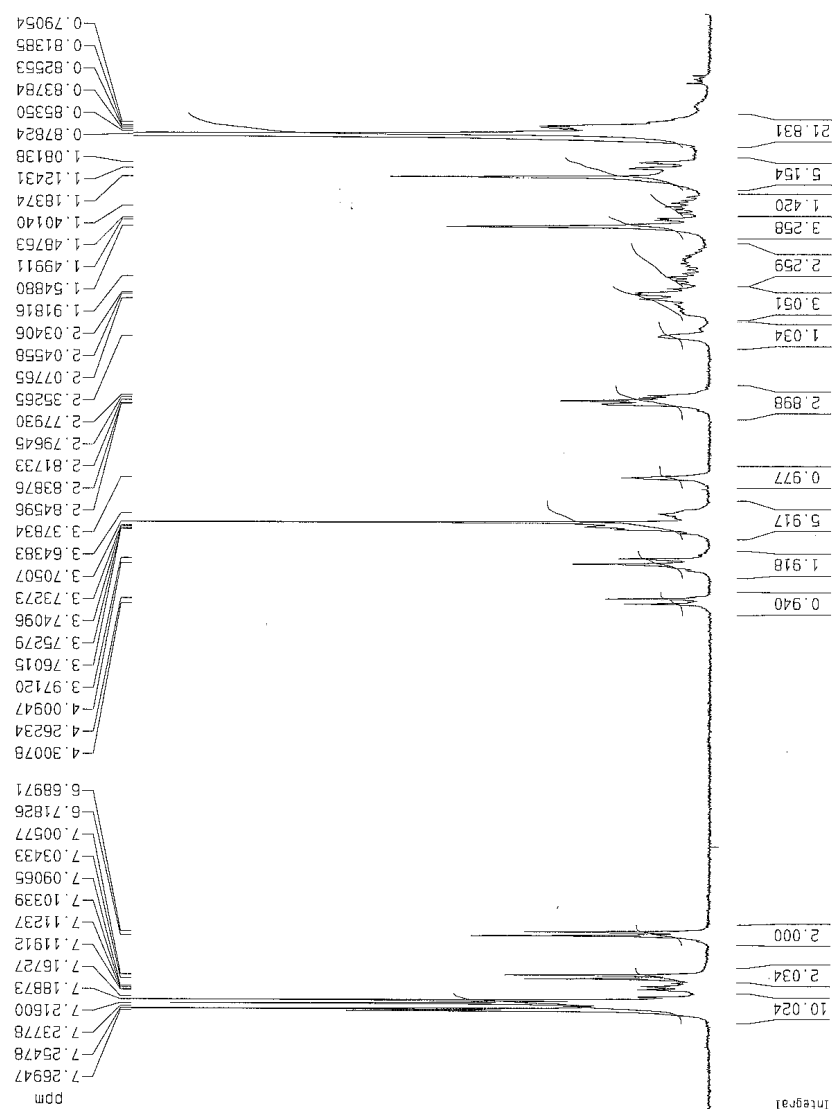

Current Data Parameters  
 NAME May14-2001-MeIn  
 EXPNO 20  
 PROCNO 1  
 F2 - Acquisition Parameters  
 Date\_ 20010514  
 Time 9.03  
 INSTRUM spect  
 PROBHD 5 mm QNP 1H/1  
 PULPROG zg30  
 TO 65636  
 SOLVENT CDCl3  
 NS 16  
 DS 2  
 SWH 6172.638 Hz  
 FIDRES 0.084190 Hz  
 AQ 5.3084660 sec  
 RG 645.1  
 DM 81.000 usec  
 DE 6.00 usec  
 TE 300.0 K  
 D1 1.0000000 sec  
 ===== CHANNEL f1 =====  
 NUC1 1H  
 P1 11.70 usec  
 PL1 0.00 dB  
 SF01 299.8718518 MHz  
 F2 - Processing parameters  
 SI 32768  
 SF 299.8700311 MHz  
 WDM EM  
 SSB 0  
 LB 0.30 Hz  
 GB 0  
 PC 1.00  
 ID NMR plot parameters  
 CX 20.00 cm  
 F1P 8.000 ppm  
 F1 2388.96 Hz  
 F2P 0.000 ppm  
 F2 0.00 Hz  
 PPMCM 0.40000 ppm/cm  
 HZCM 119.94801 Hz/cm

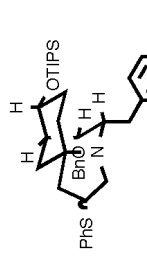

Current Data Parameters  
 NAME May20-2001-we1  
 EXPNO 11  
 PROCNO 1

F2 - Acquisition Parameters  
 Date\_ 20010520  
 Time 16.15  
 INSTRUM spect  
 PROBHD 5 mm BBI 1H-B  
 PULPROG zg30  
 TD 65536  
 SOLVENT CDCl3  
 NS 16  
 DS 2  
 SWH 8278.146 Hz  
 FIDRES 0.126314 Hz  
 AQ 3.9584293 sec  
 RG 161.3  
 DW 60.400 usec  
 DE 6.00 usec  
 TE 300.0 K  
 D1 1.00000000 sec

===== CHANNEL f1 =====  
 NUC1 1H  
 P1 6.38 usec  
 PL1 0.00 dB  
 SF01 400.1324710 MHz

F2 - Processing parameters  
 SI 32768  
 SF 400.1300894 MHz  
 WDW nd  
 SSB 0  
 LB 0.00 Hz  
 GB 0  
 PC 1.00

1D NMR plot parameters  
 CX 20.00 cm  
 F1P 8.000 ppm  
 F1 3201.04 Hz  
 F2 0.000 ppm  
 F2 0.00 Hz  
 PPMCM 0.40000 ppm/cm  
 HZCM 160.05200 Hz/cm

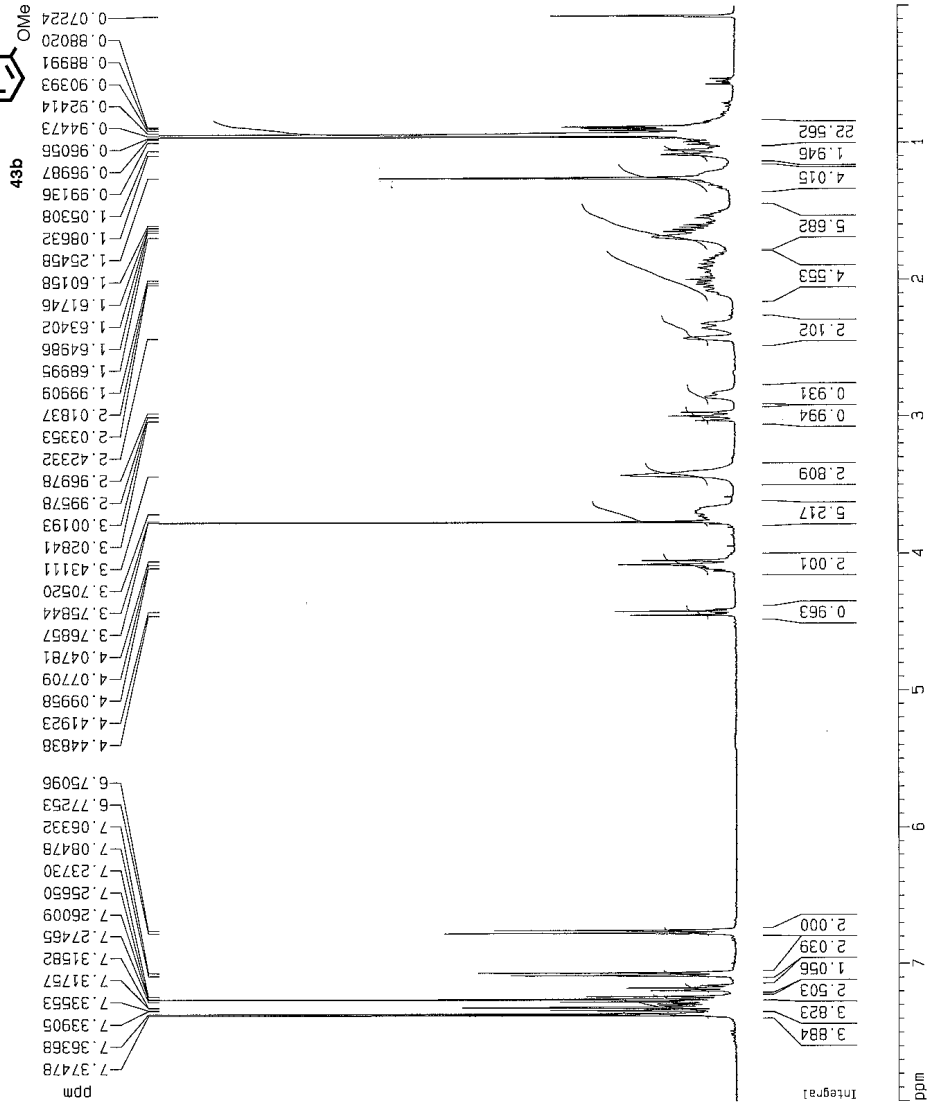

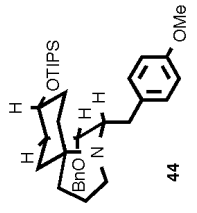

Current Data Parameters  
 NAME May29-2001-Rel  
 EXPNO 10  
 PROCNO 1

F2 - Acquisition Parameters  
 Date\_ 20010529  
 Time 20.20  
 INSTRUM spect  
 PROBHD 5 mm GNP 4H/1  
 PULPROG zg30  
 TD 65536  
 SOLVENT CDCl3  
 NS 16  
 DS 2  
 SWH 6172.839 Hz  
 FIDRES 0.094190 Hz  
 AQ 5.3084650 sec  
 RG 362  
 DW 81.000 usec  
 DE 6.00 usec  
 TE 300.0 K  
 D1 1.00000000 sec

\*\*\*\*\* CHANNEL f1 \*\*\*\*\*  
 NUC1 1H  
 P1 11.70 usec  
 PL1 0.00 dB  
 SF01 299.8718518 MHz

F2 - Processing parameters  
 SI 32768  
 SF 299.8700101 MHz  
 WDW no  
 SSB 0  
 LB 0.00 Hz  
 GB 0  
 PC 1.00

1D NMR plot parameters  
 CX 20.00 cm  
 F1P 8.000 ppm  
 F1 2398.96 Hz  
 F2P 0.000 ppm  
 F2 0.00 Hz  
 PPMCM 0.40000 ppm/cm  
 HZCM 119.94800 Hz/cm

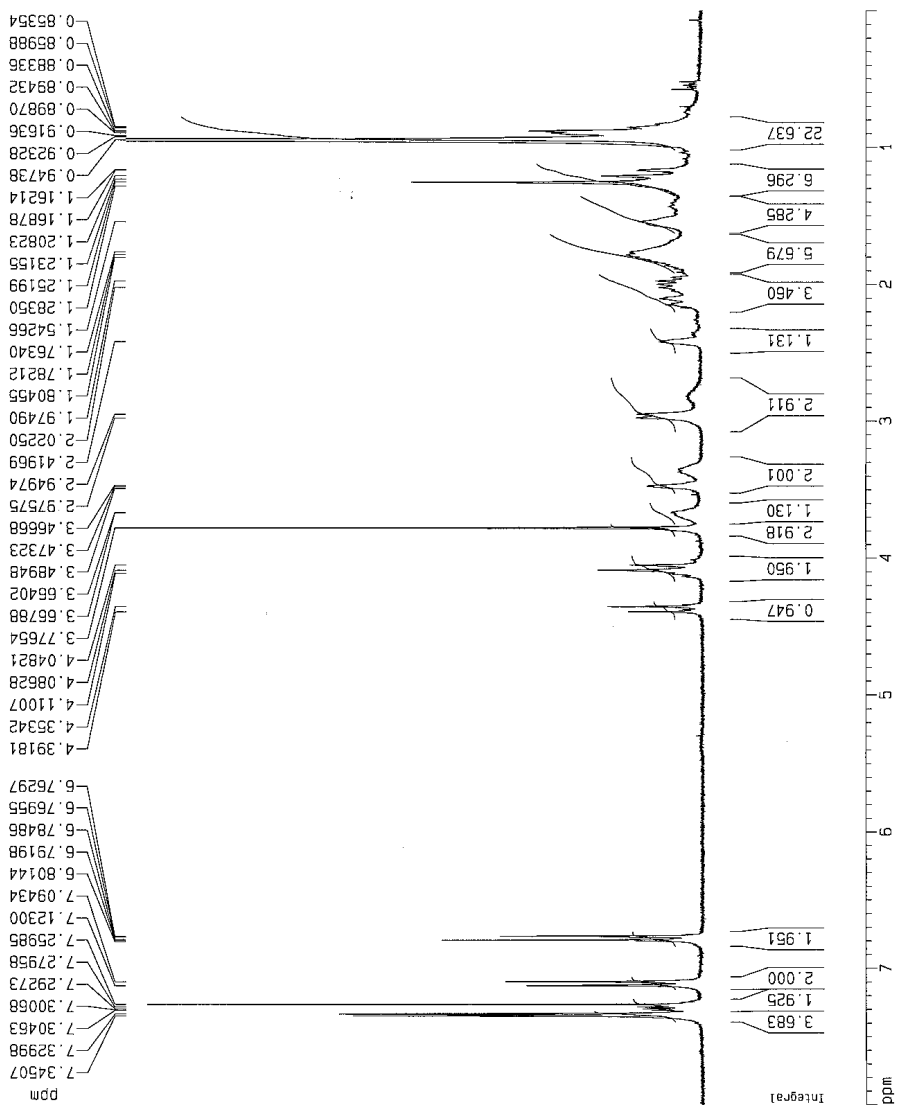

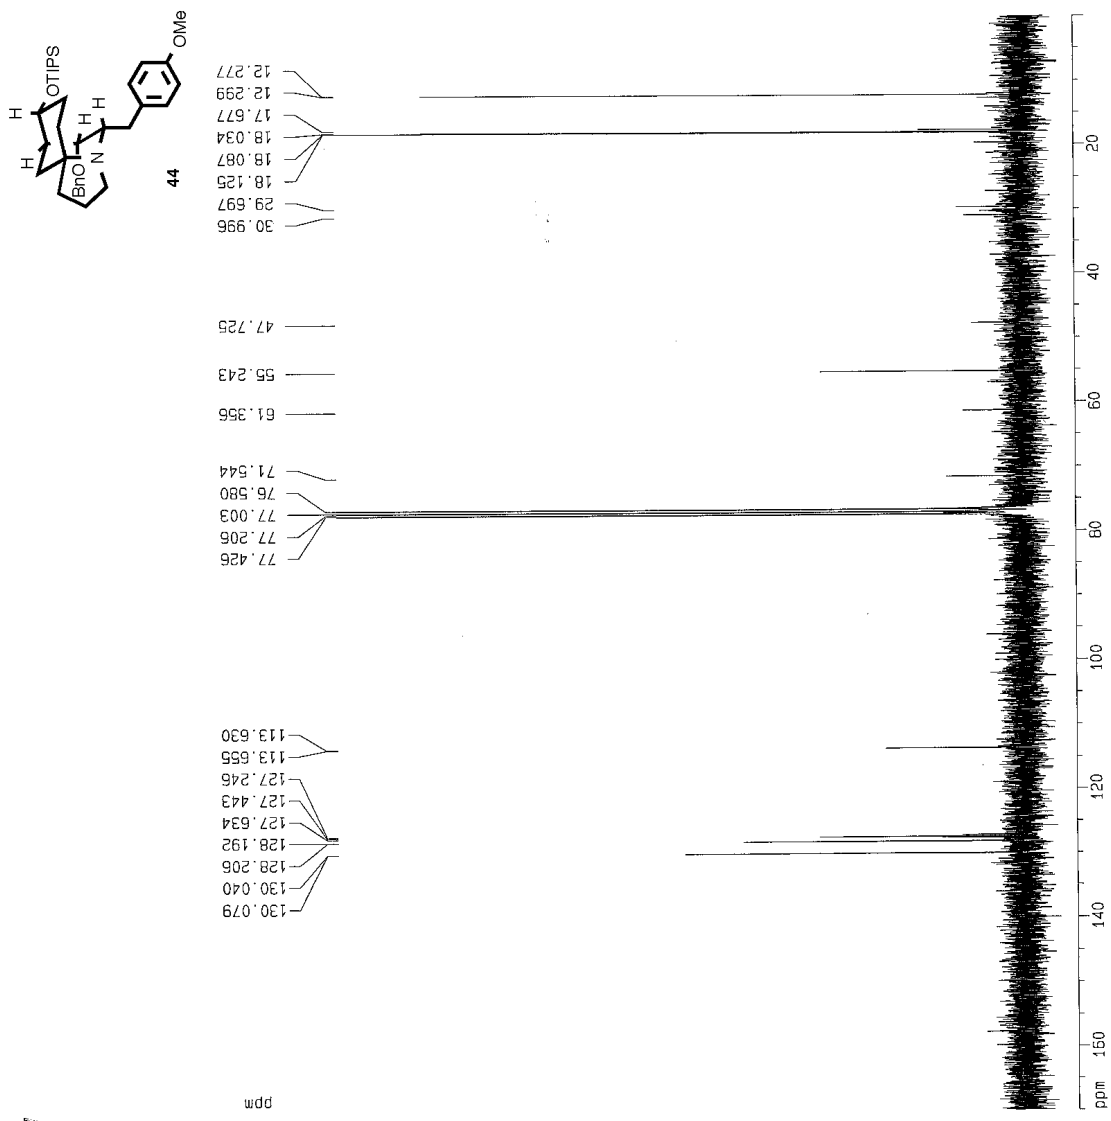

Current Data Parameters  
 NAME JUN09-2001-Wein  
 EXPNO 30  
 PROCNO 1

F2 - Acquisition Parameters  
 Date\_ 20010609  
 Time 4.03  
 INSTRUM spect  
 PROBHD 5 mm Mjltinu  
 PULPROG zgpg30  
 TD 65536  
 SOLVENT CDCl3  
 NS 10000  
 DS 4  
 SWH 18632.383 Hz  
 FIDRES 0.287360 Hz  
 AQ 1.7400308 sec  
 RG 13004  
 DK 26.550 USEC  
 DE 5.00 USEC  
 TE 300.0 K  
 D1 2.0000000 sec  
 d11 0.0300000 sec  
 d12 0.0000200 sec

===== CHANNEL f1 =====  
 NUC1 13C  
 P1 5.60 USEC  
 PL1 -6.00 dB  
 SF01 75.4760200 MHz

===== CHANNEL f2 =====  
 CROPRG2 wa1lz15  
 NUC2 1H  
 P2 114.00 USEC  
 PL2 -6.00 dB  
 PL12 18.00 dB  
 PL13 18.00 dB  
 SF02 300.1312005 MHz

F2 - Processing parameters  
 S1 32768  
 SF 75.467503 MHz  
 MDW 0  
 SSB 0  
 LB 0.00 Hz  
 GB 0  
 PC 1.40

1D NMR plot parameters  
 CX 20.00 cm  
 F1P 170.000 ppm  
 F1 12869.56 Hz  
 F2P 0.000 ppm  
 F2 0.00 Hz  
 PPMCM B.50000 ppm/cm  
 HZCM 641.47569 Hz/cm

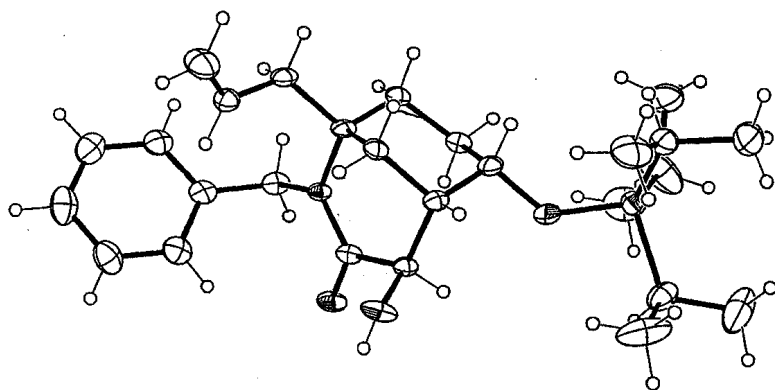

X-Ray Crystal Structure Data for  $\alpha$ -Hydroxylactam 14

Table 1. Crystal Data and Structure Refinement for  $\alpha$ -Hydroxylactam 14

|                                          |                                                                                                                               |
|------------------------------------------|-------------------------------------------------------------------------------------------------------------------------------|
| Empirical formula                        | C <sub>27</sub> H <sub>43</sub> N O <sub>3</sub> Si                                                                           |
| Formula weight                           | 457.71                                                                                                                        |
| Crystal system                           | Triclinic                                                                                                                     |
| Space group                              | P-1                                                                                                                           |
| Unit cell dimensions                     | a = 13.4402(13) Å $\alpha$ = 91.911(2)°<br>b = 14.3073(13) Å $\beta$ = 91.864(2)°<br>c = 14.3705(14) Å $\gamma$ = 106.914(2)° |
| Volume                                   | 2639.8(4) Å <sup>3</sup>                                                                                                      |
| Z                                        | 4                                                                                                                             |
| Density (calculated)                     | 1.152 Mg/m <sup>3</sup>                                                                                                       |
| Wavelength                               | 0.71073 Å                                                                                                                     |
| Temperature                              | 133(2) K                                                                                                                      |
| <i>F</i> (000)                           | 1000                                                                                                                          |
| Absorption coefficient                   | 0.116 mm <sup>-1</sup>                                                                                                        |
| Absorption correction                    | Empirical                                                                                                                     |
| Max. and min. transmission               | 0.962 and 0.651                                                                                                               |
| Theta range for data collection          | 1.59 to 25.00°                                                                                                                |
| Reflections collected                    | 29009                                                                                                                         |
| Independent reflections                  | 9077 [R(int) = 0.0648]                                                                                                        |
| Data / restraints / parameters           | 9077 / 10 / 587                                                                                                               |
| wR( <i>F</i> <sup>2</sup> all data)      | wR = 0.1373                                                                                                                   |
| R( <i>F</i> obsd data)                   | R = 0.0511                                                                                                                    |
| Goodness-of-fit on <i>F</i> <sup>2</sup> | 1.046                                                                                                                         |
| Observed data [I > 2 $\sigma$ (I)]       | 6065                                                                                                                          |
| Largest and mean shift / s.u.            | 0.000 and 0.000                                                                                                               |
| Largest diff. Peak and hole              | 0.506 and -0.554 e/Å <sup>3</sup>                                                                                             |



Table 2. Bond lengths [Å] for  $\alpha$ -Hydroxylactam · 14

|                            |            |               |          |
|----------------------------|------------|---------------|----------|
| Si(1A)-O(1A)               | 1.6433(18) | Si(1A)-C(23A) | 1.879(3) |
| Si(1A)-C(26A)              | 1.864(3)   | Si(1A)-C(29A) | 1.883(3) |
| O(1A)-C(2A)                | 1.431(3)   | Si(1B)-C(29B) | 1.883(3) |
| C(2A)-C(9A)                | 1.518(3)   | Si(1B)-C(26B) | 1.888(3) |
| C(2A)-C(3A)                | 1.522(3)   | O(1B)-C(2B)   | 1.436(3) |
| C(3A)-C(4A)                | 1.519(3)   | C(2B)-C(9B)   | 1.517(3) |
| C(3A)-C(12A)               | 1.525(3)   | C(2B)-C(3B)   | 1.531(3) |
| C(4A)-O(10A)               | 1.416(3)   | C(3B)-C(12B)  | 1.522(3) |
| C(4A)-C(5A)                | 1.524(3)   | C(3B)-C(4B)   | 1.526(3) |
| C(5A)-O(11A)               | 1.239(3)   | C(4B)-O(10B)  | 1.421(3) |
| C(5A)-N(6A)                | 1.355(3)   | C(4B)-C(5B)   | 1.520(3) |
| N(6A)-C(13A)               | 1.478(3)   | C(5B)-O(11B)  | 1.239(3) |
| N(6A)-C(7A)                | 1.498(3)   | C(5B)-N(6B)   | 1.356(3) |
| C(7A)-C(12A)               | 1.529(3)   | N(6B)-C(13B)  | 1.475(3) |
| C(7A)-C(20A)               | 1.535(3)   | N(6B)-C(7B)   | 1.496(3) |
| C(7A)-C(8A)                | 1.540(3)   | C(7B)-C(12B)  | 1.529(3) |
| C(8A)-C(9A)                | 1.528(3)   | C(7B)-C(8B)   | 1.541(3) |
| C(13A)-C(14A)              | 1.509(4)   | C(7B)-C(20B)  | 1.544(3) |
| C(14A)-C(15A)              | 1.385(4)   | C(8B)-C(9B)   | 1.530(3) |
| C(14A)-C(19A)              | 1.392(4)   | C(13B)-C(14B) | 1.510(3) |
| C(15A)-C(16A)              | 1.384(4)   | C(14B)-C(15B) | 1.392(4) |
| C(16A)-C(17A)              | 1.380(4)   | C(14B)-C(19B) | 1.393(4) |
| C(17A)-C(18A)              | 1.376(4)   | C(15B)-C(16B) | 1.386(4) |
| C(18A)-C(19A)              | 1.380(4)   | C(16B)-C(17B) | 1.378(4) |
| C(20A)-C(21A)              | 1.499(4)   | C(17B)-C(18B) | 1.379(4) |
| C(21A)-C(22A)              | 1.306(4)   | C(18B)-C(19B) | 1.387(4) |
| C(23A)-C(25A)              | 1.525(4)   | C(20B)-C(21B) | 1.503(3) |
| C(23A)-C(24A)              | 1.533(4)   | C(21B)-C(22B) | 1.306(4) |
| C(26A)-C(28 <sup>†</sup> ) | 1.484(4)   | C(23B)-C(25B) | 1.527(4) |
| C(26A)-C(27A)              | 1.501(4)   | C(23B)-C(24B) | 1.533(4) |
| C(26A)-C(28A)              | 1.505(3)   | C(26B)-C(27B) | 1.518(4) |
| C(29A)-C(31A)              | 1.523(4)   | C(26B)-C(28B) | 1.563(4) |
| C(29A)-C(30A)              | 1.553(4)   | C(29B)-C(31B) | 1.531(4) |
| Si(1B)-O(1B)               | 1.6519(18) | C(29B)-C(30B) | 1.536(3) |
| Si(1B)-C(23B)              | 1.882(3)   |               |          |

Table 3. Bond angles [Å] for  $\alpha$ -Hydroxylactan 14

|                      |            |                      |            |
|----------------------|------------|----------------------|------------|
| O(1A)-Si(1A)-C(26A)  | 110.57(14) | C(23A)-Si(1A)-C(29A) | 115.69(13) |
| O(1A)-Si(1A)-C(23A)  | 100.41(11) | C(2A)-O(1A)-Si(1A)   | 130.28(16) |
| C(26A)-Si(1A)-C(23A) | 107.90(16) | O(1A)-C(2A)-C(9A)    | 111.0(2)   |
| O(1A)-Si(1A)-C(29A)  | 111.19(11) | O(1A)-C(2A)-C(3A)    | 108.32(19) |
| C(26A)-Si(1A)-C(29A) | 110.64(14) | C(9A)-C(2A)-C(3A)    | 111.8(2)   |
| C(4A)-C(3A)-C(2A)    | 113.5(2)   | C(27A)-C(26A)-Si(1A) | 113.7(2)   |
| C(4A)-C(3A)-C(12A)   | 108.2(2)   | C(28A)-C(26A)-Si(1A) | 118.0(3)   |
| C(2A)-C(3A)-C(12A)   | 110.0(2)   | C(31A)-C(29A)-C(30A) | 109.7(3)   |
| O(10A)-C(4A)-C(3A)   | 107.78(19) | C(31A)-C(29A)-Si(1A) | 116.5(2)   |
| O(10A)-C(4A)-C(5A)   | 108.12(19) | C(30A)-C(29A)-Si(1A) | 112.0(2)   |
| C(3A)-C(4A)-C(5A)    | 115.4(2)   | O(1B)-Si(1B)-C(23B)  | 103.14(10) |
| O(11A)-C(5A)-N(6A)   | 121.2(2)   | O(1B)-Si(1B)-C(29B)  | 109.98(10) |
| O(11A)-C(5A)-C(4A)   | 118.0(2)   | C(23B)-Si(1B)-C(29B) | 111.33(12) |
| N(6A)-C(5A)-C(4A)    | 120.8(2)   | O(1B)-Si(1B)-C(26B)  | 111.56(11) |
| C(5A)-N(6A)-C(13A)   | 116.6(2)   | C(23B)-Si(1B)-C(26B) | 112.60(12) |
| C(5A)-N(6A)-C(7A)    | 123.0(2)   | C(29B)-Si(1B)-C(26B) | 108.21(12) |
| C(13A)-N(6A)-C(7A)   | 118.39(18) | C(2B)-O(1B)-Si(1B)   | 125.65(16) |
| N(6A)-C(7A)-C(12A)   | 108.14(18) | O(1B)-C(2B)-C(9B)    | 110.4(2)   |
| N(6A)-C(7A)-C(20A)   | 111.16(19) | O(1B)-C(2B)-C(3B)    | 109.65(19) |
| C(12A)-C(7A)-C(20A)  | 109.53(19) | C(9B)-C(2B)-C(3B)    | 111.5(2)   |
| N(6A)-C(7A)-C(8A)    | 108.45(19) | C(12B)-C(3B)-C(4B)   | 108.2(2)   |
| C(12A)-C(7A)-C(8A)   | 109.1(2)   | C(12B)-C(3B)-C(2B)   | 109.5(2)   |
| C(20A)-C(7A)-C(8A)   | 110.4(2)   | C(4B)-C(3B)-C(2B)    | 113.4(2)   |
| C(9A)-C(8A)-C(7A)    | 112.4(2)   | O(10B)-C(4B)-C(5B)   | 108.99(19) |
| C(2A)-C(9A)-C(8A)    | 110.4(2)   | O(10B)-C(4B)-C(3B)   | 106.88(19) |
| C(3A)-C(12A)-C(7A)   | 110.16(19) | C(5B)-C(4B)-C(3B)    | 116.1(2)   |
| N(6A)-C(13A)-C(14A)  | 113.9(2)   | O(11B)-C(5B)-N(6B)   | 121.4(2)   |
| C(15A)-C(14A)-C(19A) | 118.3(3)   | O(11B)-C(5B)-C(4B)   | 117.8(2)   |
| C(15A)-C(14A)-C(13A) | 121.2(2)   | N(6B)-C(5B)-C(4B)    | 120.8(2)   |
| C(19A)-C(14A)-C(13A) | 120.4(2)   | C(5B)-N(6B)-C(13B)   | 116.7(2)   |
| C(16A)-C(15A)-C(14A) | 120.6(3)   | C(5B)-N(6B)-C(7B)    | 122.9(2)   |
| C(17A)-C(16A)-C(15A) | 120.4(3)   | C(13B)-N(6B)-C(7B)   | 118.83(19) |
| C(18A)-C(17A)-C(16A) | 119.7(3)   | N(6B)-C(7B)-C(12B)   | 108.30(19) |
| C(17A)-C(18A)-C(19A) | 120.0(3)   | N(6B)-C(7B)-C(8B)    | 108.60(19) |
| C(18A)-C(19A)-C(14A) | 121.1(3)   | C(12B)-C(7B)-C(8B)   | 109.6(2)   |
| C(21A)-C(20A)-C(7A)  | 115.6(2)   | N(6B)-C(7B)-C(20B)   | 111.09(19) |
| C(22A)-C(21A)-C(20A) | 125.3(3)   | C(12B)-C(7B)-C(20B)  | 109.3(2)   |
| C(25A)-C(23A)-C(24A) | 110.6(3)   | C(8B)-C(7B)-C(20B)   | 109.9(2)   |
| C(25A)-C(23A)-Si(1A) | 116.3(2)   | C(9B)-C(8B)-C(7B)    | 112.2(2)   |
| C(24A)-C(23A)-Si(1A) | 112.5(2)   | C(2B)-C(9B)-C(8B)    | 110.0(2)   |
| C(28)-C(26A)-C(27A)  | 122.5(5)   | C(3B)-C(12B)-C(7B)   | 110.0(2)   |

|                      |          |                      |            |
|----------------------|----------|----------------------|------------|
| C(28')-C(26A)-C(28A) | 36.6(5)  | N(6B)-C(13B)-C(14B)  | 114.7(2)   |
| C(27A)-C(26A)-C(28A) | 111.0(3) | C(15B)-C(14B)-C(19B) | 118.6(2)   |
| C(28')-C(26A)-Si(1A) | 123.6(4) | C(15B)-C(14B)-C(13B) | 121.2(2)   |
| C(19B)-C(14B)-C(13B) | 120.2(2) | C(25B)-C(23B)-Si(1B) | 112.98(18) |
| C(16B)-C(15B)-C(14B) | 120.3(3) | C(24B)-C(23B)-Si(1B) | 114.14(18) |
| C(17B)-C(16B)-C(15B) | 120.6(3) | C(27B)-C(26B)-C(28B) | 109.4(2)   |
| C(16B)-C(17B)-C(18B) | 119.8(3) | C(27B)-C(26B)-Si(1B) | 114.5(2)   |
| C(17B)-C(18B)-C(19B) | 120.0(3) | C(28B)-C(26B)-Si(1B) | 113.22(19) |
| C(18B)-C(19B)-C(14B) | 120.7(3) | C(31B)-C(29B)-C(30B) | 109.7(2)   |
| C(21B)-C(20B)-C(7B)  | 115.6(2) | C(31B)-C(29B)-Si(1B) | 112.66(18) |
| C(22B)-C(21B)-C(20B) | 125.1(3) | C(30B)-C(29B)-Si(1B) | 114.78(18) |
| C(25B)-C(23B)-C(24B) | 111.0(2) |                      |            |

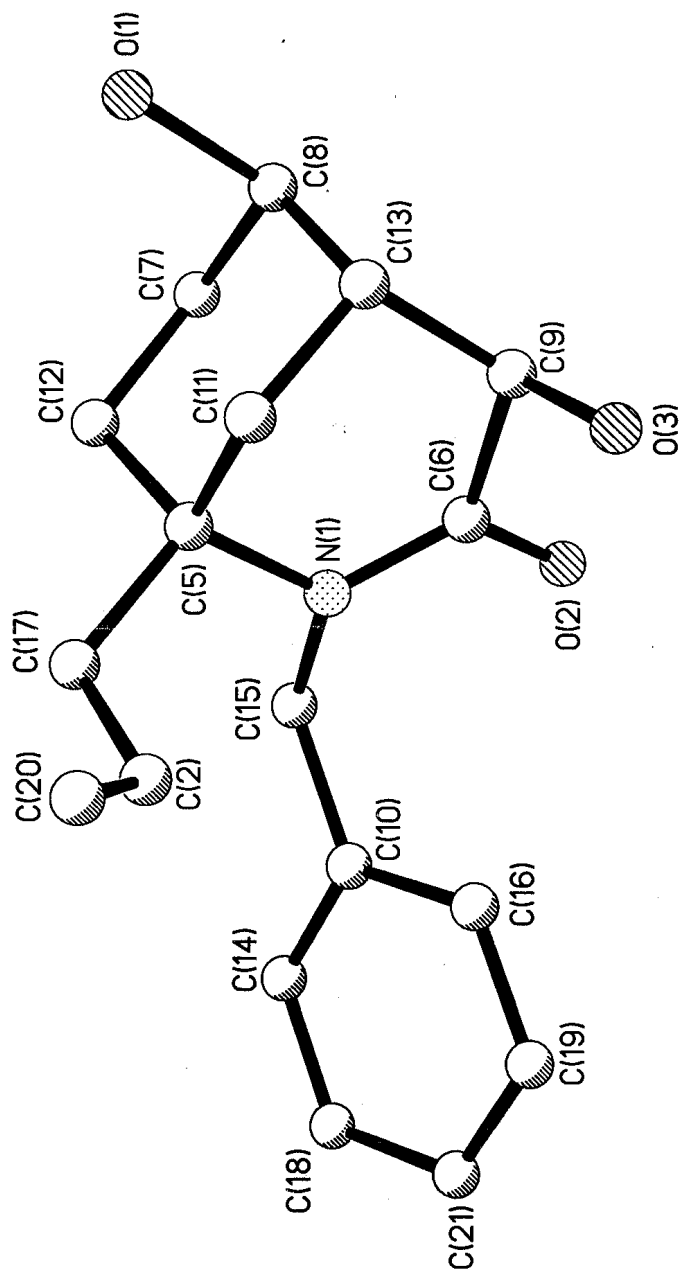

X-Ray Crystal Structure of Diol 32

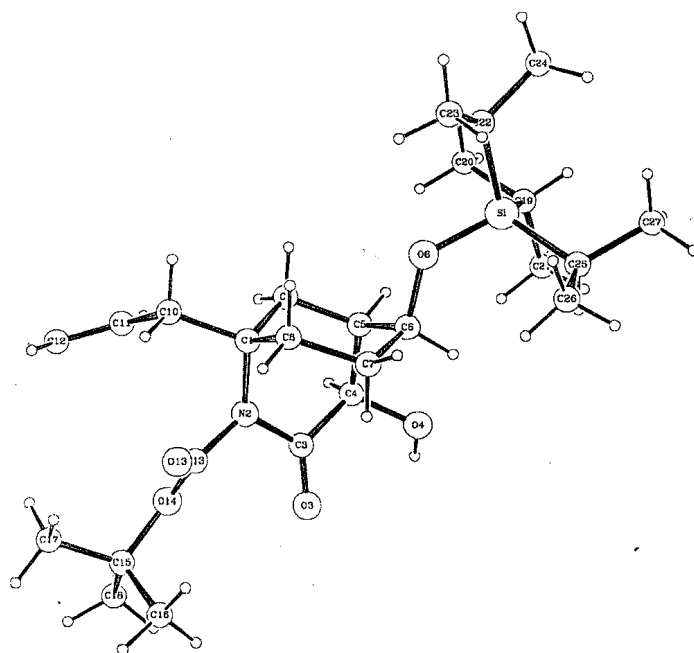

X-Ray Crystal Structure Data for  $\alpha$ -Hydroxyimide 34

Table 1. X-ray Data for  $\alpha$ -Hydroxyimide **34** at 295 K.

|                                                                 |                                                    |
|-----------------------------------------------------------------|----------------------------------------------------|
| Formula                                                         | C <sub>25</sub> H <sub>45</sub> NO <sub>5</sub> Si |
| Formula weight                                                  | 467.727                                            |
| Crystal size (mm)                                               | 0.16 x 0.32 x 0.60                                 |
| Crystal system                                                  | monoclinic                                         |
| Space group                                                     | <i>P</i> 2 <sub>1</sub> / <i>c</i>                 |
| <i>a</i> (Å)                                                    | 16.643(4)                                          |
| <i>b</i> (Å)                                                    | 11.474(1)                                          |
| <i>c</i> (Å)                                                    | 14.896(3)                                          |
| $\beta$ (°)                                                     | 95.07(2)                                           |
| <i>V</i> (Å <sup>3</sup> )                                      | 2833.4(10)                                         |
| <i>Z</i>                                                        | 4                                                  |
| <i>d</i> <sub>calc</sub> (g cm <sup>-3</sup> )                  | 1.096                                              |
| $\mu$ (Mo <i>K</i> $\alpha$ ) (cm <sup>-1</sup> )               | 1.087                                              |
| Absorption correction                                           | none                                               |
| Maximum $\theta$ (°)                                            | 25                                                 |
| Unique reflections                                              | 4973                                               |
| Observed reflections<br>[ <i>I</i> > 3.0 $\sigma$ ( <i>I</i> )] | 1014                                               |
| Number of variables                                             | 290                                                |
| <i>R</i>                                                        | 0.055                                              |
| <i>R</i> <sub>w</sub>                                           | 0.054                                              |
| ( $\Delta\rho$ ) <sub>max</sub> (e Å <sup>-3</sup> )            | 0.18                                               |
| ( $\Delta\rho$ ) <sub>min</sub> (e Å <sup>-3</sup> )            | -0.20                                              |

Table 2. Bond lengths (Å) for  $\alpha$ -Hydroxyimide 34.

| <u>Atom 1</u> | <u>Atom 2</u> | <u>Distance</u> | <u>Atom 1</u> | <u>Atom 2</u> | <u>Distance</u> |
|---------------|---------------|-----------------|---------------|---------------|-----------------|
| Si            | O6            | 1.634(5)        | C4            | C5            | 1.51(1)         |
| Si            | C19           | 1.88(1)         | C5            | C6            | 1.54(1)         |
| Si            | C22           | 1.86(1)         | C5            | C9            | 1.51(1)         |
| Si            | C25           | 1.87(1)         | C6            | C7            | 1.53(1)         |
| O3            | C3            | 1.18(1)         | C7            | C8            | 1.53(1)         |
| O4            | C4            | 1.41(1)         | C10           | C11           | 1.53(1)         |
| O6            | C6            | 1.441(9)        | C11           | C12           | 1.28(1)         |
| O13           | C13           | 1.19(1)         | C15           | C16           | 1.50(2)         |
| O14           | C13           | 1.33(1)         | C15           | C17           | 1.50(2)         |
| O14           | C15           | 1.47(1)         | C15           | C18           | 1.52(1)         |
| N2            | C1            | 1.50(1)         | C19           | C20           | 1.57(2)         |
| N2            | C3            | 1.41(1)         | C19           | C21           | 1.53(2)         |
| N2            | C13           | 1.41(1)         | C22           | C23           | 1.32(2)         |
| C1            | C8            | 1.51(1)         | C22           | C24           | 1.53(1)         |
| C1            | C9            | 1.50(1)         | C25           | C26           | 1.42(2)         |
| C1            | C10           | 1.56(1)         | C25           | C27           | 1.56(2)         |
| C3            | C4            | 1.54(1)         |               |               |                 |

Standard deviations are in parentheses.

Table 3. Bond angles (deg) for  $\alpha$ -Hydroxyimide 34.

| <u>Atom 1</u> | <u>Atom 2</u> | <u>Atom 3</u> | <u>Angle</u> | <u>Atom 1</u> | <u>Atom 2</u> | <u>Atom 3</u> | <u>Angle</u> |
|---------------|---------------|---------------|--------------|---------------|---------------|---------------|--------------|
| O6            | Si            | C19           | 112.4(4)     | O6            | C6            | C5            | 107.2(6)     |
| O6            | Si            | C22           | 102.2(4)     | O6            | C6            | C7            | 108.5(6)     |
| O6            | Si            | C25           | 109.8(4)     | C5            | C6            | C7            | 111.4(6)     |
| C19           | Si            | C22           | 107.3(5)     | C6            | C7            | C8            | 113.7(7)     |
| C19           | Si            | C25           | 110.1(5)     | C1            | C8            | C7            | 110.9(7)     |
| C22           | Si            | C25           | 115.0(5)     | C1            | C9            | C5            | 110.1(7)     |
| Si            | O6            | C6            | 127.0(5)     | C1            | C10           | C11           | 115.6(7)     |
| C13           | O14           | C15           | 121.6(6)     | C10           | C11           | C12           | 124(1)       |
| C1            | N2            | C3            | 124.2(6)     | O13           | C13           | O14           | 124.8(7)     |
| C1            | N2            | C13           | 116.7(6)     | O13           | C13           | N2            | 125.3(8)     |
| C3            | N2            | C13           | 115.0(6)     | O14           | C13           | N2            | 109.8(7)     |
| N2            | C1            | C8            | 111.2(7)     | O14           | C15           | C16           | 110.9(7)     |
| N2            | C1            | C9            | 107.3(6)     | O14           | C15           | C17           | 110.9(8)     |
| N2            | C1            | C10           | 109.1(6)     | O14           | C15           | C18           | 102.9(7)     |
| C8            | C1            | C9            | 110.0(6)     | C16           | C15           | C17           | 112.2(9)     |
| C8            | C1            | C10           | 110.7(7)     | C16           | C15           | C18           | 109.5(9)     |
| C9            | C1            | C10           | 108.5(6)     | C17           | C15           | C18           | 110.1(9)     |
| O3            | C3            | N2            | 123.6(7)     | Si            | C19           | C20           | 112.4(7)     |
| O3            | C3            | C4            | 122.5(7)     | Si            | C19           | C21           | 115.0(7)     |
| N2            | C3            | C4            | 113.8(6)     | C20           | C19           | C21           | 109.4(8)     |
| O4            | C4            | C3            | 108.2(6)     | Si            | C22           | C23           | 120.9(9)     |
| O4            | C4            | C5            | 110.4(6)     | Si            | C22           | C24           | 117.6(8)     |
| C3            | C4            | C5            | 116.0(7)     | C23           | C22           | C24           | 111.6(9)     |
| C4            | C5            | C6            | 112.2(7)     | Si            | C25           | C26           | 120.6(9)     |
| C4            | C             | C9            | 106.8(6)     | Si            | C25           | C27           | 109.8(8)     |
| C6            | C5            | C9            | 113.0(7)     | C26           | C25           | C27           | 115(1)       |

Standard deviations are in parentheses.
